# Supplementary material for: Nickel-catalyzed divergent formylation and carboxylation of aryl halides with isocyanides
Source: Royal Society of Chemistry journal article supplement (doi:10.1039/d3ob00327b), 2023-01-01

# Nickel-Catalyzed Divergent Formylation and Carboxylation of Aryl Halides with Isocyanides

Haoying Mao, Hongwei Qian, Zhichang He, Zhiguo Zhang, Hongwei Jin, Yunkui Liu and Bingwei Zhou\*

College of Chemical Engineering, Zhejiang University of Technology, Hangzhou, 310014, P. R. of China.

E-mail: [zhoubw@zjut.edu.cn](mailto:zhoubw@zjut.edu.cn)

## Table of Contents

|                                                                              |     |
|------------------------------------------------------------------------------|-----|
| 1. General Information                                                       | S2  |
| 2. List of Aryl Iodides                                                      | S3  |
| 3. Ni-Catalyzed Formylation/Carboxylation of Aryl Halides with Isocyanides   | S4  |
| 3.1 Optimization of the carboxylation reaction                               | S4  |
| 3.2 Optimization of the formylation reaction                                 | S5  |
| 3.3 Experimental details and characterization of aldehydes                   | S5  |
| 3.4 Experimental details and characterization of carboxylic acids            | S9  |
| 3.5 Unsuccessful examples                                                    | S14 |
| 4. Mechanistic Studies                                                       | S15 |
| 4.1 Investigation of the possible intermediate in the carboxylation reaction | S15 |
| 4.2 Investigation of the other possible carbonyl sources                     | S15 |
| 4.3 Detection of <i>tert</i> -octylamine <b>7a</b>                           | S16 |
| 4.4 O <sup>18</sup> -labelling experiment                                    | S16 |
| 4.5 Deuterium-labelling experiment                                           | S18 |
| 5. References                                                                | S21 |
| 6. <sup>1</sup> H NMR spectra                                                | S22 |

## 1. General Information

Unless otherwise noted, all reactions were carried out in flame-dried reaction vessels with Teflon screw caps under nitrogen. Solvents were purified and dried according to standard methods prior to use. All commercially available reagents were obtained from chemical suppliers and used after proper purification if necessary. Flash column chromatography was performed on silica gel (200-300 mesh) with the indicated solvent mixtures. TLC analysis was performed on pre-coated, glass-backed silica gel plates and visualized with UV light.

The  $^1\text{H}$  NMR spectra were recorded on a Bruker 400 AV or 500 AV spectrometers. Chemical shifts ( $\delta$ ) were reported as parts per million (ppm) downfield from tetramethylsilane and the following abbreviations were used to identify the multiplicities: s = singlet, d = doublet, t = triplet, q = quartet, m = multiplet, dd = doublet of doublets, dt = doublet of triplets, dq = doublet of quartets, br = broad and all combinations thereof can be explained by their integral parts. Coupling constant ( $J$ ) was reported in hertz unit (Hz)..

## 2. List of Aryl Iodides

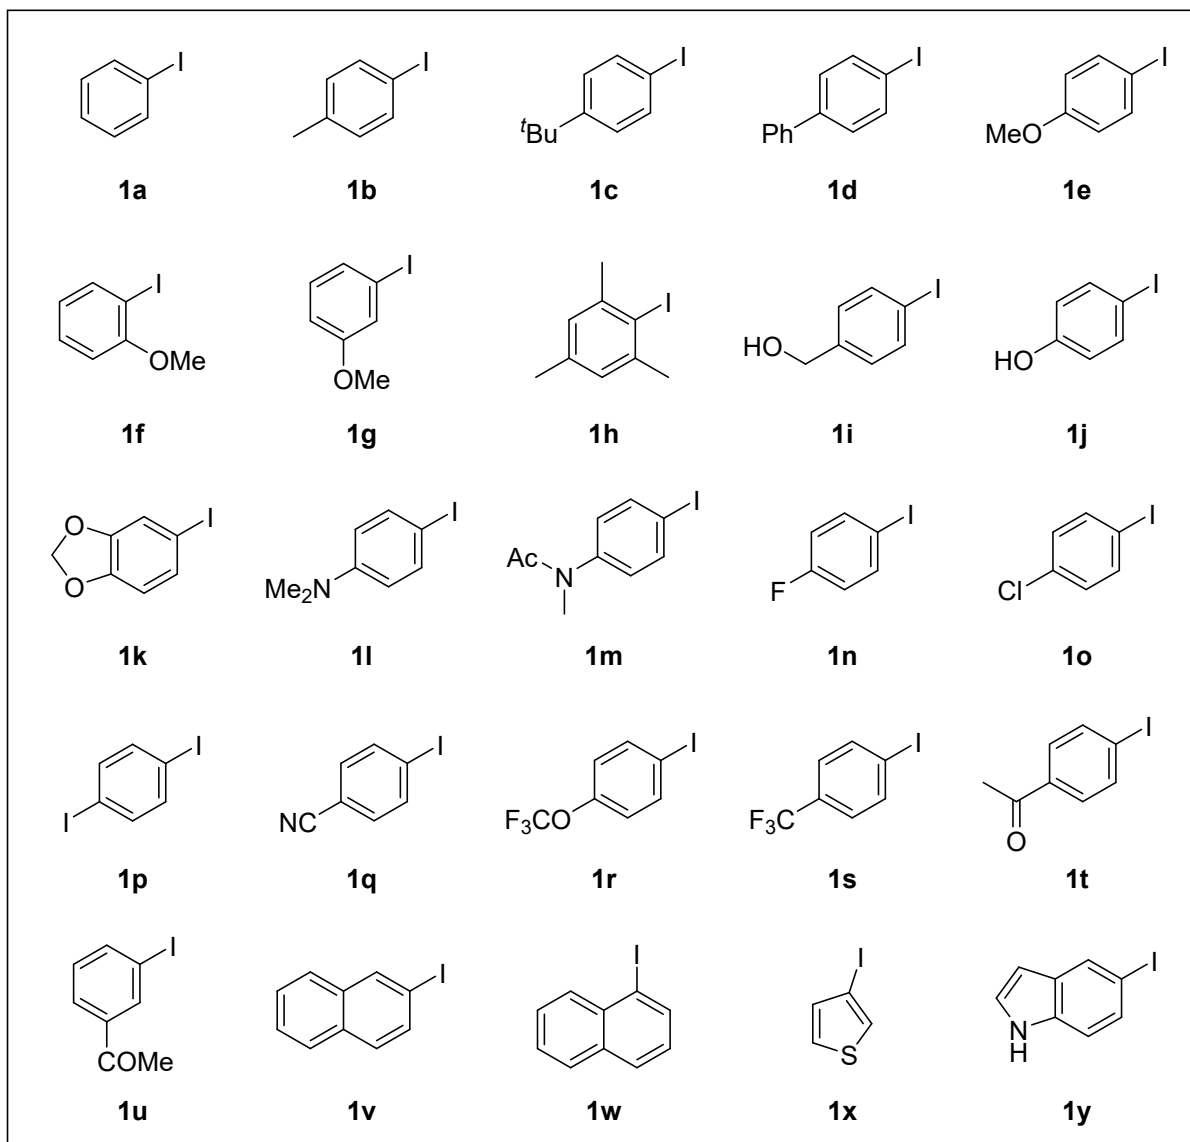

The substrate **1m** was prepared according to the known literature.<sup>1</sup> Other aryl iodides are commercially available and used as received.

### 3. Nickel-Catalyzed Formylation/Carboxylation of Aryl Halides with Isocyanides.

#### 3.1 Optimization of the carboxylation reaction

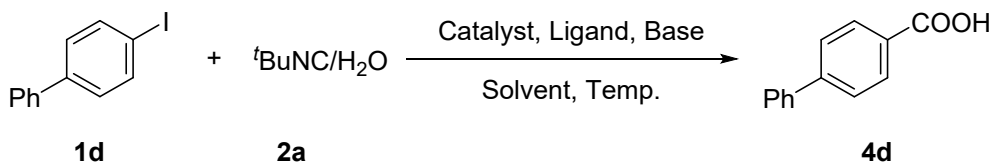

| Entry | Catalyst (mol%)                              | Ligand (mol%)  | Base (equiv)                        | Solvent | Temp. (°C) | Yield (%) |
|-------|----------------------------------------------|----------------|-------------------------------------|---------|------------|-----------|
| 1     | NiBr <sub>2</sub> (5)                        | <b>L1</b> (5)  | HCOONa (2)                          | DMF     | 120        | 85        |
| 2     | NiI <sub>2</sub> (5)                         | <b>L1</b> (5)  | HCOONa (2)                          | DMF     | 120        | 63        |
| 3     | NiCl <sub>2</sub> (5)                        | <b>L1</b> (5)  | HCOONa (2)                          | DMF     | 120        | 62        |
| 4     | Ni(OAc) <sub>2</sub> • 4H <sub>2</sub> O (5) | <b>L1</b> (5)  | HCOONa (2)                          | DMF     | 120        | 70        |
| 5     | Ni(OTf) <sub>2</sub> (5)                     | <b>L1</b> (5)  | HCOONa (2)                          | DMF     | 120        | 60        |
| 6     | Ni(acac) <sub>2</sub> (5)                    | <b>L1</b> (5)  | HCOONa (2)                          | DMF     | 120        | 65        |
| 7     | NiBr <sub>2</sub> (10)                       | <b>L1</b> (10) | HCOONa (2)                          | DMF     | 120        | 85        |
| 8     | -                                            | <b>L1</b> (5)  | HCOONa (2)                          | DMF     | 120        | 0         |
| 9     | NiBr <sub>2</sub> (5)                        | <b>L2</b> (5)  | HCOONa (2)                          | DMF     | 120        | 75        |
| 10    | NiBr <sub>2</sub> (5)                        | <b>L3</b> (5)  | HCOONa (2)                          | DMF     | 120        | 80        |
| 11    | NiBr <sub>2</sub> (5)                        | <b>L4</b> (5)  | HCOONa (2)                          | DMF     | 120        | 78        |
| 12    | NiBr <sub>2</sub> (5)                        | <b>L5</b> (5)  | HCOONa (2)                          | DMF     | 120        | 42        |
| 13    | NiBr <sub>2</sub> (5)                        | <b>L6</b> (5)  | HCOONa (2)                          | DMF     | 120        | 45        |
| 14    | NiBr <sub>2</sub> (5)                        | <b>L7</b> (5)  | HCOONa (2)                          | DMF     | 120        | 50        |
| 15    | NiBr <sub>2</sub> (5)                        | <b>L8</b> (5)  | HCOONa (2)                          | DMF     | 120        | 62        |
| 16    | NiBr <sub>2</sub> (5)                        | <b>L9</b> (5)  | HCOONa (2)                          | DMF     | 120        | 55        |
| 17    | NiBr <sub>2</sub> (5)                        | <b>L10</b> (5) | HCOONa (2)                          | DMF     | 120        | 50        |
| 18    | NiBr <sub>2</sub> (5)                        | <b>L11</b> (5) | HCOONa (2)                          | DMF     | 120        | 53        |
| 19    | NiBr <sub>2</sub> (5)                        | -              | HCOONa (2)                          | DMF     | 120        | 55        |
| 20    | NiBr <sub>2</sub> (5)                        | <b>L1</b> (5)  | AcOONa (2)                          | DMF     | 120        | 45        |
| 21    | NiBr <sub>2</sub> (5)                        | <b>L1</b> (5)  | EtONa (2)                           | DMF     | 120        | 60        |
| 22    | NiBr <sub>2</sub> (5)                        | <b>L1</b> (5)  | Na <sub>2</sub> CO <sub>3</sub> (2) | DMF     | 120        | 0         |
| 23    | NiBr <sub>2</sub> (5)                        | <b>L1</b> (5)  | <sup>t</sup> BuONa (2)              | DMF     | 120        | 38        |
| 24    | NiBr <sub>2</sub> (5)                        | <b>L1</b> (5)  | -                                   | DMF     | 120        | 0         |
| 25    | NiBr <sub>2</sub> (5)                        | <b>L1</b> (5)  | HCOONa (1)                          | DMF     | 120        | 70        |
| 26    | NiBr <sub>2</sub> (5)                        | <b>L1</b> (5)  | HCOONa (0.5)                        | DMF     | 120        | 55        |
| 27    | NiBr <sub>2</sub> (5)                        | <b>L1</b> (5)  | HCOONa (2)                          | NMP     | 120        | 68        |
| 28    | NiBr <sub>2</sub> (5)                        | <b>L1</b> (5)  | HCOONa (2)                          | DMA     | 120        | 65        |
| 29    | NiBr <sub>2</sub> (5)                        | <b>L1</b> (5)  | HCOONa (2)                          | DMSO    | 120        | 70        |
| 30    | NiBr <sub>2</sub> (5)                        | <b>L1</b> (5)  | HCOONa (2)                          | Toluene | 120        | trace     |
| 31    | NiBr <sub>2</sub> (5)                        | <b>L1</b> (5)  | HCOONa (2)                          | THF     | 120        | trace     |

|    |                       |               |            |     |     |                 |
|----|-----------------------|---------------|------------|-----|-----|-----------------|
| 32 | NiBr <sub>2</sub> (5) | <b>L1</b> (5) | HCOONa (2) | DMF | 90  | 68              |
| 33 | NiBr <sub>2</sub> (5) | <b>L1</b> (5) | HCOONa (2) | DMF | 150 | 84              |
| 34 | NiBr <sub>2</sub> (5) | <b>L1</b> (5) | HCOONa (2) | DMF | 120 | 75 <sup>b</sup> |

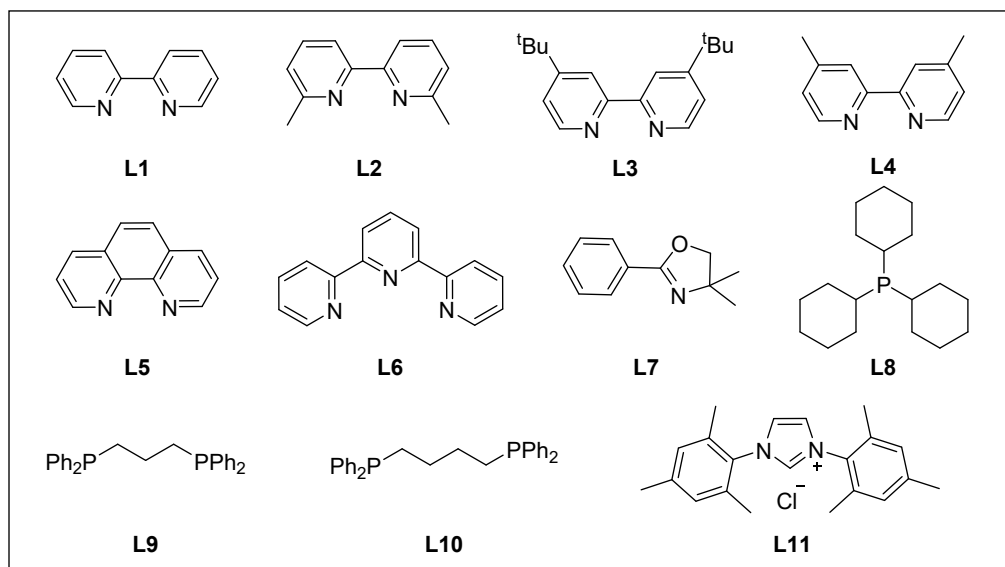

<sup>a</sup>Reaction conditions: **1d** (0.4 mmol), **2a** (0.6 mmol), Solvent (1 mL), 12 h. <sup>b</sup>For 24 h.

### 3.2 Optimization of the formylation reaction

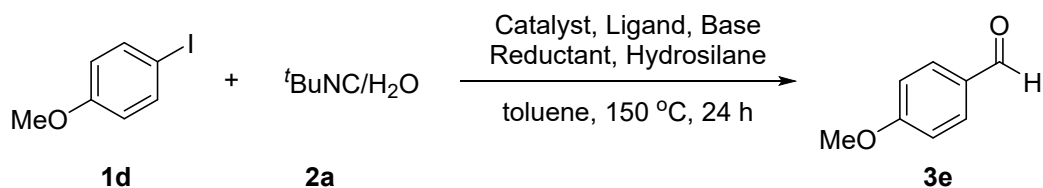

| Entry | Catalyst/<br>(mol%)    | Ligand/<br>(mol%) | Base            | Hydrosilane              | Reductant | Yield of<br><b>3e</b> /% |
|-------|------------------------|-------------------|-----------------|--------------------------|-----------|--------------------------|
| 1     | NiBr <sub>2</sub> (20) | <b>L1</b> (24)    | <i>t</i> -BuONa | Me <sub>2</sub> PhSiH    | Zn (2)    | 80                       |
| 2     | NiBr <sub>2</sub> (20) | <b>L1</b> (24)    | <i>t</i> -BuONa | Me <sub>2</sub> PhSiH    | Zn (1)    | 69                       |
| 3     | NiBr <sub>2</sub> (20) | <b>L1</b> (24)    | <i>t</i> -BuONa | Me <sub>2</sub> PhSiH    | Zn (0.3)  | 65                       |
| 4     | NiBr <sub>2</sub> (20) | <b>L1</b> (24)    | <i>t</i> -BuONa | Me <sub>2</sub> PhSiH    | -         | 57                       |
| 5     | NiBr <sub>2</sub> (20) | <b>L1</b> (24)    | <i>t</i> -BuOK  | Me <sub>2</sub> PhSiH    | Zn (2)    | 25                       |
| 6     | NiBr <sub>2</sub> (20) | <b>L1</b> (24)    | <i>t</i> -BuOLi | Me <sub>2</sub> PhSiH    | Zn (2)    | 23                       |
| 7     | NiBr <sub>2</sub> (20) | <b>L1</b> (24)    | <i>t</i> -BuONa | Me <sub>2</sub> PhSiH    | Mn (2)    | 75                       |
| 8     | NiBr <sub>2</sub> (20) | <b>L1</b> (24)    | <i>t</i> -BuONa | Me <sub>2</sub> PhSiH    | Mg (2)    | 33                       |
| 9     | NiBr <sub>2</sub> (10) | <b>L1</b> (12)    | <i>t</i> -BuONa | Me <sub>2</sub> PhSiH    | Zn (2)    | 78                       |
| 10    | NiBr <sub>2</sub> (5)  | <b>L1</b> (6)     | <i>t</i> -BuONa | Me <sub>2</sub> PhSiH    | Zn (2)    | 51                       |
| 11    | -                      | <b>L1</b> (12)    | <i>t</i> -BuONa | Me <sub>2</sub> PhSiH    | Zn (2)    | 0                        |
| 12    | NiBr <sub>2</sub> (10) | <b>L1</b> (12)    | <i>t</i> -BuONa | Et <sub>3</sub> SiH      | Zn (2)    | 57                       |
| 13    | NiBr <sub>2</sub> (10) | <b>L1</b> (12)    | <i>t</i> -BuONa | Ph <sub>3</sub> SiH      | Zn (2)    | 43                       |
| 14    | NiBr <sub>2</sub> (10) | <b>L1</b> (12)    | <i>t</i> -BuONa | (EtO) <sub>2</sub> MeSiH | Zn (2)    | 27                       |
| 15    | NiBr <sub>2</sub> (10) | <b>L1</b> (12)    | <i>t</i> -BuONa | -                        | Zn (2)    | 0                        |
| 16    | NiBr <sub>2</sub> (10) | <b>L1</b> (12)    | <i>t</i> -BuONa | Me <sub>2</sub> PhSiH    | Zn (2)    | 62 <sup>b</sup>          |
| 17    | NiBr <sub>2</sub> (10) | <b>L3</b> (12)    | <i>t</i> -BuONa | Me <sub>2</sub> PhSiH    | Zn (2)    | 38                       |

|    |                        |                 |                 |                       |        |    |
|----|------------------------|-----------------|-----------------|-----------------------|--------|----|
| 18 | NiBr <sub>2</sub> (10) | <b>L4</b> (12)  | <i>t</i> -BuONa | Me <sub>2</sub> PhSiH | Zn (2) | 53 |
| 19 | NiBr <sub>2</sub> (10) | <b>L5</b> (12)  | <i>t</i> -BuONa | Me <sub>2</sub> PhSiH | Zn (2) | 48 |
| 20 | NiBr <sub>2</sub> (10) | <b>L8</b> (12)  | <i>t</i> -BuONa | Me <sub>2</sub> PhSiH | Zn (2) | 36 |
| 21 | NiBr <sub>2</sub> (10) | <b>L11</b> (12) | <i>t</i> -BuONa | Me <sub>2</sub> PhSiH | Zn (2) | 0  |

<sup>a</sup>Reaction conditions: **1d** (0.4 mmol), **2a** (0.48 mmol), Catalyst, Ligand (1.2 equiv to catalyst), Base (1 equiv), Zn (2 equiv), Hydrosilane (3 equiv), toluene (1 mL), at 150 °C for 24 h. <sup>b</sup>At 120 °C.

### 3.3 Experimental details and characterization of aromatic aldehydes

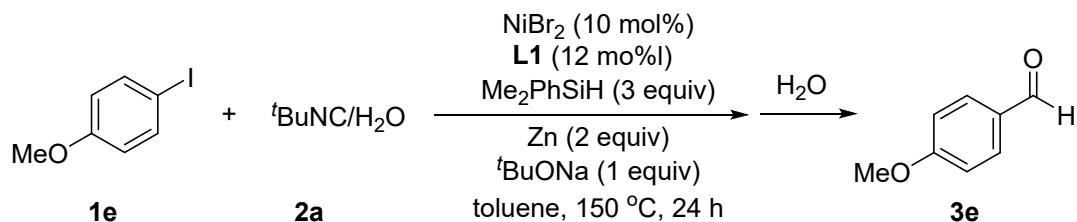

To a 25 ml flame-dried Schlenk tube containing a stirring bar was added 1-iodo-4-methoxybenzene (0.4 mmol, 93.6 mg), NiBr<sub>2</sub> (10 mol%, 0.04 mmol, 8.8 mg), **L1** (12 mol%, 0.048 mmol, 7.488 mg), Zn (0.8 mmol, 52 mg), *t*-BuONa (0.4 mmol, 38.4 mg), toluene (1 mL), *t*-BuNC (0.48 mmol, 40 mg), and dimethylphenylsilane (1.2 mmol, 163 mg) sequentially under nitrogen. The tube was sealed and stirred at 150 °C for 24 h. After completion, H<sub>2</sub>O (0.2 ml) was added to the reaction. The resulting mixture was concentrated and purified by silica gel column chromatography to provide the product **3e** in 78% yield.

#### benzaldehyde (**3a**)<sup>2</sup>

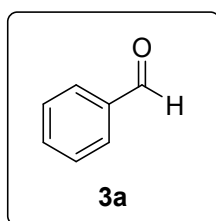

Following the general procedure, compound **3a** was obtained as yellow oil (19 mg, 45% yield).

<sup>1</sup>H NMR (400 MHz, CDCl<sub>3</sub>) δ 10.01 (s, 1H), 7.91 – 7.84 (m, 2H), 7.66 – 7.59 (m, 1H), 7.52 (t, *J* = 7.5 Hz, 2H).

#### 4-methylbenzaldehyde (**3b**)<sup>1</sup>

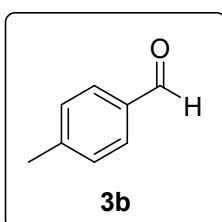

Following the general procedure, compound **3b** was obtained as yellow oil (30 mg, 63% yield).

<sup>1</sup>H NMR (400 MHz, CDCl<sub>3</sub>) δ 9.95 (s, 1H), 7.76 (d, *J* = 8.1 Hz, 2H), 7.32 (d, *J* = 8.0 Hz, 2H), 2.42 (s, 3H).

#### 4-(*tert*-butyl)benzaldehyde (**3c**)<sup>1</sup>

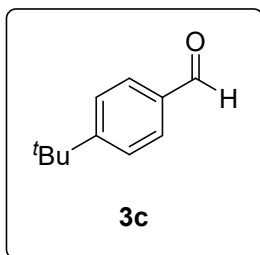

Following the general procedure, compound **3c** was obtained as yellow oil (56 mg, 89% yield).

**<sup>1</sup>H NMR (400 MHz, CDCl<sub>3</sub>)** δ 9.98 (s, 1H), 7.82 (d, *J* = 8.2 Hz, 2H), 7.55 (d, *J* = 8.2 Hz, 2H), 1.36 (s, 9H). **<sup>13</sup>C NMR (126 MHz, CDCl<sub>3</sub>)** δ 191.90, 158.31, 133.98, 129.59, 125.88, 35.22, 30.95.

#### [1,1'-biphenyl]-4-carbaldehyde (**3d**)<sup>1</sup>

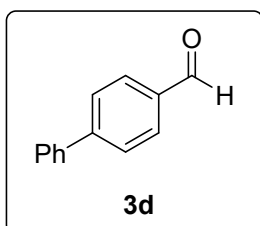

Following the general procedure, compound **3d** was obtained as yellow oil (40 mg, 55% yield).

**<sup>1</sup>H NMR (400 MHz, CDCl<sub>3</sub>)** δ 10.05 (s, 1H), 7.98 – 7.92 (m, 2H), 7.74 (d, *J* = 8.2 Hz, 2H), 7.65 – 7.60 (m, 2H), 7.51 – 7.45 (m, 2H), 7.44 – 7.38 (m, 1H).

#### 4-methoxybenzaldehyde (**3e**)<sup>1</sup>

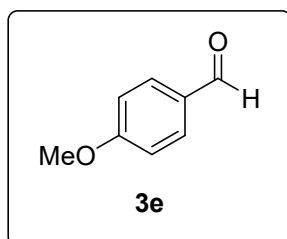

Following the general procedure, compound **3e** was obtained as yellow oil (36 mg, 78% yield).

**<sup>1</sup>H NMR (400 MHz, CDCl<sub>3</sub>)** δ 9.89 (s, 1H), 7.86 – 7.82 (m, 2H), 7.03 – 6.99 (m, 2H), 3.89 (s, 3H). **<sup>13</sup>C NMR (126 MHz, CDCl<sub>3</sub>)** δ 190.67, 164.50, 131.84, 129.83, 114.19, 55.44.

#### 2-methoxybenzaldehyde (**3f**)<sup>2</sup>

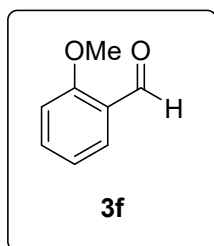

Following the general procedure, compound **3f** was obtained as yellow oil (26 mg, 47% yield).

**<sup>1</sup>H NMR (400 MHz, CDCl<sub>3</sub>)** δ 10.44 (d, *J* = 0.7 Hz, 1H), 7.78 (dd, *J*<sub>1</sub> = 7.7, *J*<sub>2</sub> = 1.9 Hz, 1H), 7.53 – 7.48 (m, 1H), 6.96 (dd, *J*<sub>1</sub> = 15.4, *J*<sub>2</sub> = 7.9 Hz, 2H), 3.86 (s, 3H).

#### 3-methoxybenzaldehyde (**3g**)<sup>3</sup>

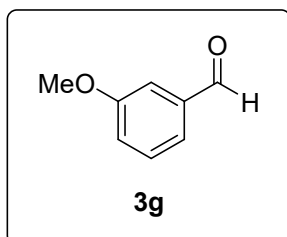

Following the general procedure, compound **3g** was obtained as yellow oil (34 mg, 66% yield).

**<sup>1</sup>H NMR (400 MHz, CDCl<sub>3</sub>)** δ 9.96 (s, 1H), 7.47 – 7.42 (m, 2H), 7.38 (d, *J* = 2.1 Hz, 1H), 7.19 – 7.14 (m, 1H), 3.84 (s, 3H).

#### benzo[d][1,3]dioxole-5-carbaldehyde (**3h**)<sup>1</sup>

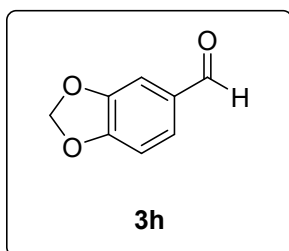

Following the general procedure, compound **3h** was obtained as yellow oil (34 mg, 56% yield).

**<sup>1</sup>H NMR (400 MHz, CDCl<sub>3</sub>)** δ 9.81 (s, 1H), 7.44 – 7.39 (m, 1H), 7.34 (d, *J* = 1.5 Hz, 1H), 6.96 – 6.92 (m, 1H), 6.08 (d, *J* = 3.1 Hz, 2H).

#### 4-(dimethylamino)benzaldehyde (**3i**)<sup>4</sup>

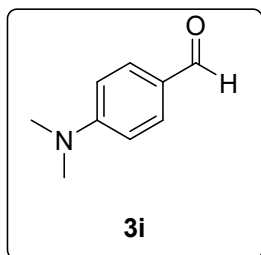

Following the general procedure, compound **3i** was obtained as yellow oil (32 mg, 53% yield).

**<sup>1</sup>H NMR (400 MHz, CDCl<sub>3</sub>)** δ 9.74 (s, 1H), 7.74 (d, *J* = 8.9 Hz, 2H), 6.70 (d, *J* = 8.9 Hz, 2H), 3.08 (s, 6H). **<sup>13</sup>C NMR (126 MHz, CDCl<sub>3</sub>)** δ 190.23, 154.27, 131.89, 125.05, 110.91, 39.98.

#### N-(4-formylphenyl)-N-methylacetamide (**3j**)<sup>5</sup>

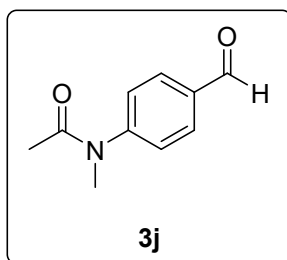

Following the general procedure, compound **3j** was obtained as yellow oil (33 mg, 47% yield).

**<sup>1</sup>H NMR (400 MHz, CDCl<sub>3</sub>)** δ 10.04 (s, 1H), 7.96 (d, *J* = 8.3 Hz, 2H), 7.40 (d, *J* = 8.3 Hz, 2H), 3.33 (s, 3H), 1.99 (s, 3H).

#### 4-chlorobenzaldehyde (**3k**)<sup>1</sup>

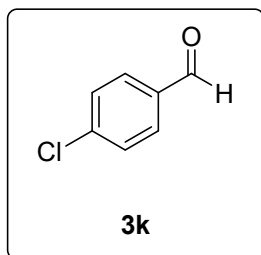

Following the general procedure, compound **3k** was obtained as yellow oil (24 mg, 43% yield).

**<sup>1</sup>H NMR (400 MHz, CDCl<sub>3</sub>)** δ 9.99 (s, 1H), 7.85 – 7.81 (m, 2H), 7.56 – 7.47 (m, 2H). **<sup>13</sup>C NMR (126 MHz, CDCl<sub>3</sub>)** δ 190.85, 140.94, 134.68, 130.89, 129.43.

#### 2,4,6-trimethylbenzaldehyde (**3l**)<sup>6</sup>

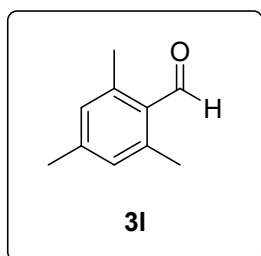

Following the general procedure, compound **3l** was obtained as yellow oil (36 mg, 61% yield).

**<sup>1</sup>H NMR (400 MHz, CDCl<sub>3</sub>)** δ 10.56 (s, 1H), 6.90 (s, 2H), 2.58 (s, 6H), 2.32 (s, 3H).

#### 2-naphthaldehyde (**3m**)<sup>1</sup>



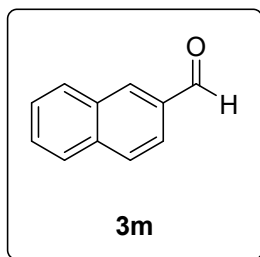

Following the general procedure, compound **3m** was obtained as yellow oil (33 mg, 53% yield).

**<sup>1</sup>H NMR (400 MHz, CDCl<sub>3</sub>)** δ 10.13 (s, 1H), 8.30 (s, 1H), 8.00 – 7.86 (m, 4H), 7.66 – 7.54 (m, 2H). **<sup>13</sup>C NMR (126 MHz, CDCl<sub>3</sub>)** δ 192.21, 136.39, 134.50, 134.05, 132.58, 129.47,

129.07, 129.04, 128.03, 127.04, 122.70.

#### 1-naphthaldehyde (**3n**)<sup>1</sup>

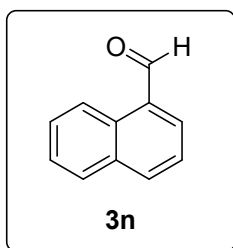

Following the general procedure, compound **3n** was obtained as yellow oil (32 mg, 51% yield).

**<sup>1</sup>H NMR (400 MHz, CDCl<sub>3</sub>)** δ 10.32 (d, *J* = 2.7 Hz, 1H), 9.22 (d, *J* = 8.6 Hz, 1H), 8.01 (d, *J* = 8.2 Hz, 1H), 7.87 (dd, *J*<sub>1</sub> = 17.1, *J*<sub>2</sub> = 7.5 Hz, 2H), 7.64 (t, *J* = 7.6 Hz, 1H), 7.54 (t, *J* = 7.4 Hz, 2H).

#### thiophene-3-carbaldehyde (**3o**)<sup>7</sup>

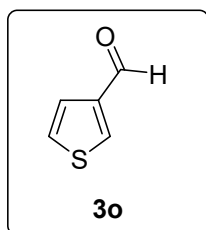

Following the general procedure, compound **3o** was obtained as yellow oil (13 mg, 30% yield).

**<sup>1</sup>H NMR (400 MHz, CDCl<sub>3</sub>)** δ 9.93 (s, 1H), 8.14 (dd, *J*<sub>1</sub> = 2.9, *J*<sub>2</sub> = 1.2 Hz, 1H), 7.54 (dd, *J*<sub>1</sub> = 5.1, *J*<sub>2</sub> = 1.1 Hz, 1H), 7.41 – 7.36 (m, 1H).

#### 1H-indole-5-carbaldehyde (**3p**)<sup>8</sup>

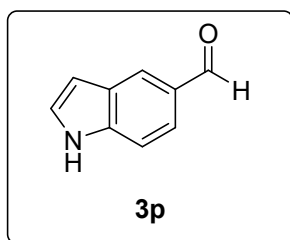

Following the general procedure, compound **3p** was obtained as yellow oil (35 mg, 60% yield).<sup>c</sup>

**<sup>1</sup>H NMR (400 MHz, CDCl<sub>3</sub>)** δ 10.04 (s, 1H), 8.82 (s, 1H), 8.19 (s, 1H), 7.78 (dd, *J*<sub>1</sub> = 8.5, *J*<sub>2</sub> = 1.2 Hz, 1H), 7.49 (d, *J* = 8.5 Hz, 1H), 7.33 (t, *J* = 2.8 Hz, 1H), 6.71 (s, 1H).

### 3.4 Experimental details and characterization of aromatic carboxylic acids

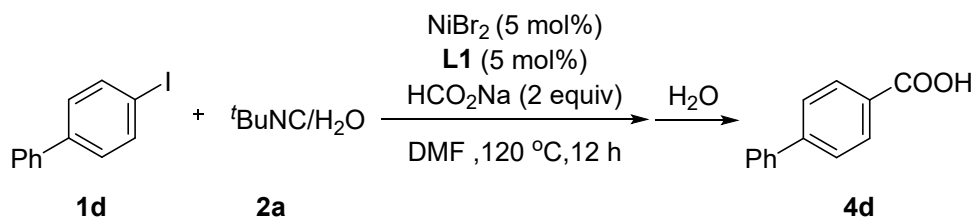

Under the positive nitrogen atmosphere, **1d** (0.4 mmol, 112 mg), **2a** (0.6 mmol, 49.8 mg),  $\text{NiBr}_2$  (5 mol%, 4.4 mg), **L1** (5 mol%, 3.1 mg),  $\text{HCO}_2\text{Na}$  (0.8 mmol, 54.4 mg), and  $\text{DMF}$  (1 mL) were added to 25 mL Schlenk tube. The reaction mixture was stirred at 120 °C for 12 hours. After the completion,  $\text{H}_2\text{O}$  (1 mL) was added to the reaction and the resulting mixture was extracted with ethyl acetate (5 mL $\times$ 2). The combined organic layer was dried over the anhydrous  $\text{Na}_2\text{SO}_4$ . The solvent was removed under vacuum and the residue was purified by column chromatography (PE : EA = 5:1) to give the desired product in 84% yield as white solid.

#### benzoic acid (**4a**)<sup>9</sup>

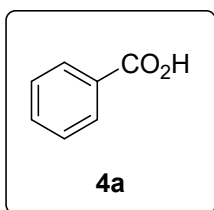

Following the general procedure: 10 mol% of  $\text{NiBr}_2$  and 10 mol% bipyridine were used. Compound **4a** was obtained as a white solid in 68% yield (33 mg); mp = 120 °C.

$^1\text{H NMR}$  (500 MHz,  $\text{DMSO}-d_6$ ):  $\delta$  12.96 (br, 0.7H), 7.95 (d,  $J$  = 7.0 Hz, 2H), 7.63 (t,  $J$  = 6.9 Hz, 1H), 7.51 (t,  $J$  = 7.7 Hz, 2H).  $^{13}\text{C NMR}$  (126 MHz,  $\text{DMSO}-d_6$ )  $\delta$  167.37, 132.85, 130.85, 129.27, 128.57.

#### p-methylacetyl urea benzoic acid (**4b**)<sup>9</sup>

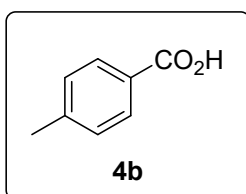

Following the general procedure: 10 mol% of  $\text{NiBr}_2$  and 10 mol% bipyridine were used. Compound **4b** was obtained as a white solid in 65% yield (35 mg); mp = 175 °C.

$^1\text{H NMR}$  (400 MHz,  $\text{DMSO}-d_6$ ):  $\delta$  7.83 (d,  $J$  = 7.9 Hz, 2H), 7.28 (d,  $J$  = 7.9 Hz, 2H), 2.35 (s, 3H).

#### 4-(tert-butyl)benzoic acid (**4c**)<sup>10</sup>

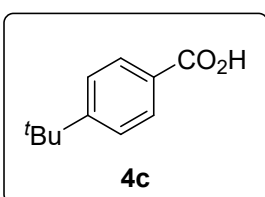

Following the general procedure: 10 mol% of  $\text{NiBr}_2$  and 10 mol% bipyridine were used. Compound **4c** was obtained as a white solid in 65% yield (46 mg); mp = 160 °C.

**<sup>1</sup>H NMR (500 MHz, DMSO-*d*<sub>6</sub>):** δ 12.78 (br, 0.56H), 7.88 (d, *J* = 8.5 Hz, 2H), 7.51 (d, *J* = 8.4 Hz, 2H), 1.29 (s, 9H).

#### [1,1'-biphenyl]-4-carboxylic acid (**4d**)<sup>10</sup>

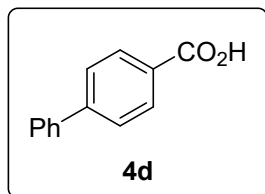

Following the general procedure: 10 mol% of NiBr<sub>2</sub> and 10 mol% bipyridine were used. Compound **4d** was obtained as a white solid in 84% yield (66 mg); mp = 220 °C.

**<sup>1</sup>H NMR (500 MHz, DMSO-*d*<sub>6</sub>):** δ 13.00 (br, 0.58H), 8.04 (d, *J* = 8.3 Hz, 2H), 7.81 (d, *J* = 8.3 Hz, 2H), 7.74 (d, *J* = 7.4 Hz, 2H), 7.51 (t, *J* = 7.6 Hz, 2H), 7.43 (t, *J* = 7.3 Hz, 1H).

#### 4-methoxybenzoic acid (**4e**)<sup>9</sup>

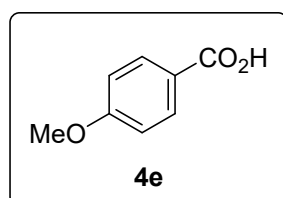

Following the general procedure, compound **4e** was obtained as a white solid in 69% yield (42 mg); mp = 180 °C.

**<sup>1</sup>H NMR (500 MHz, DMSO-*d*<sub>6</sub>):** δ 12.63 (br, 0.89H), 7.90 (d, *J* = 8.9 Hz, 2H), 7.02 (d, *J* = 8.8 Hz, 2H), 3.83 (s, 3H).

#### 4-(hydroxymethyl)benzoic acid (**4f**)<sup>11</sup>

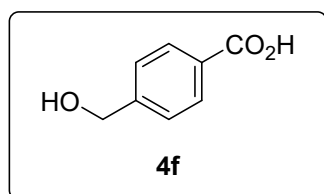

Following the general procedure, compound **4f** was obtained as a white solid in 72% yield (43 mg); mp = 175 °C.

**<sup>1</sup>H NMR (400 MHz, DMSO-*d*<sub>6</sub>):** δ 7.92 (d, *J* = 8.0 Hz, 2H), 7.44 (d, *J* = 8.0 Hz, 2H), 5.41 (br, 1H), 4.58 (s, 2H). **<sup>13</sup>C NMR (126 MHz, DMSO-*d*<sub>6</sub>)** δ 167.69, 147.92, 129.50, 129.38, 126.52, 62.72.

#### 5-((trimethylsilyl)oxy)benzoic acid (**4g**)<sup>10</sup>

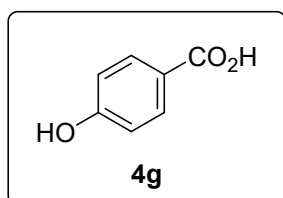

Following the general procedure, compound **4g** was obtained as a white solid in 53% yield (29 mg); mp = 278 °C.

**<sup>1</sup>H NMR (500 MHz, DMSO-*d*<sub>6</sub>):** δ 11.08 (br, 1.72H), 7.84 (d, *J* = 7.9 Hz, 2H), 7.30 (d, *J* = 7.9 Hz, 2H), 2.36 (s, 3H).

#### 4-fluorobenzoic acid (**4h**)<sup>9</sup>

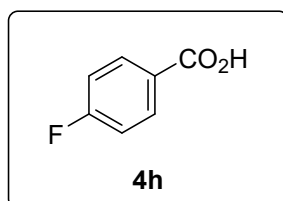

Following the general procedure, compound **4h** was obtained as a white solid in 42% yield (24 mg); mp = 180 °C;

**<sup>1</sup>H NMR (500 MHz, DMSO-*d*<sub>6</sub>):** δ 8.00 (dd, *J* = 8.0, 5.9 Hz, 2H), 7.30 (t, *J* = 8.6 Hz, 2H).

#### 4-iodobenzoic acid (4i)<sup>12</sup>

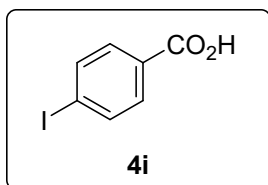

Following the general procedure, compound **4i** was obtained as a white solid in 61% yield (61 mg); mp = 265 °C.

**<sup>1</sup>H NMR (500 MHz, DMSO-*d*<sub>6</sub>):** δ 13.14 (br, 0.79H), 7.89 (t, *J* = 9.9 Hz, 2H), 7.71 (t, *J* = 7.9 Hz, 2H).

#### 4-cyanobenzoic acid (4j)<sup>10</sup>

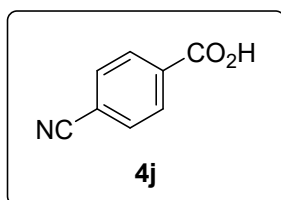

Following the general procedure, compound **4j** was obtained as a white solid in 72% yield (42 mg); mp = 215 °C.

**<sup>1</sup>H NMR (400 MHz, DMSO-*d*<sub>6</sub>):** δ 7.83 (d, *J* = 7.9 Hz, 2H), 7.28 (d, *J* = 7.9 Hz, 2H).

#### 4-(trifluoromethoxy)benzoic acid (4k)<sup>13</sup>

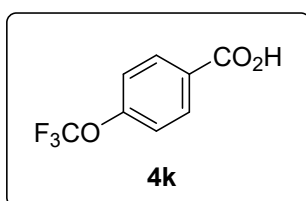

Following the general procedure, compound **4k** was obtained as a white solid in 58% yield (48 mg); mp = 150 °C.

**<sup>1</sup>H NMR (400 MHz, DMSO-*d*<sub>6</sub>):** δ 8.09 (d, *J* = 7.6 Hz, 2H), 7.51 (d, *J* = 8.2 Hz, 2H).

#### 4-(trifluoromethyl)benzoic acid (4l)<sup>9</sup>

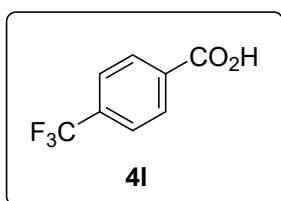

Following the general procedure, compound **4l** was obtained as a white solid in 48% yield (37 mg); mp = 210 °C.

**<sup>1</sup>H NMR (400 MHz, DMSO-*d*<sub>6</sub>):** δ 13.43 (br, 0.55H), 8.16 (d, *J* = 8.1 Hz, 2H), 7.90 (d, *J* = 8.3 Hz, 2H).

#### 4-acetylbenzoic acid (4m)<sup>14</sup>

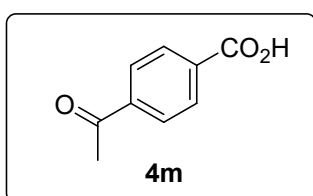

Following the general procedure, compound **4m** was obtained as a white solid in 57% yield (37 mg); mp = 205 °C.

**<sup>1</sup>H NMR (400 MHz, DMSO-*d*<sub>6</sub>):** δ 8.06 (s, 4H), 2.64 (s, 3H).

**<sup>13</sup>C NMR (126 MHz, DMSO-*d*<sub>6</sub>):** δ 197.76, 166.68, 139.82,

134.61, 129.56, 128.31, 26.99.

#### 5-(methoxycarbonyl)benzoic acid (4n)<sup>15</sup>

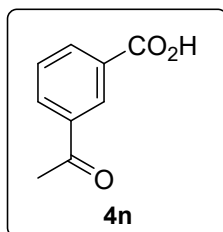

Following the general procedure, compound **4n** was obtained as a white solid in 76% yield (50 mg); mp = 234 °C.

**<sup>1</sup>H NMR (400 MHz, DMSO-*d*<sub>6</sub>):** δ 8.43 (s, 1H), 8.17 (t, *J* = 7.2 Hz, 2H), 7.65 (t, *J* = 7.7 Hz, 1H), 2.61 (s, 3H).

### 2-naphthoic acid (**4o**)<sup>13</sup>

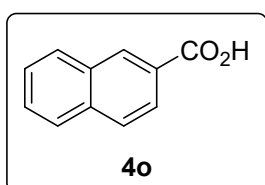

Following the general procedure, compound **4o** was obtained as a white solid in 56% yield (39 mg); mp = 180 °C.

**<sup>1</sup>H NMR (400 MHz, DMSO-*d*<sub>6</sub>):** δ 8.62 (s, 1H), 8.12 (d, *J* = 7.9 Hz, 1H), 8.03 – 7.97 (m, 3H), 7.69 – 7.58 (m, 2H).

### 1H-indole-5-carboxylic acid (**4p**)<sup>9</sup>

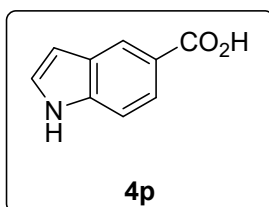

Following the general procedure, compound **4p** was obtained as a white solid in 70% yield (45 mg); mp = 205 °C.

**<sup>1</sup>H NMR (400 MHz, DMSO-*d*<sub>6</sub>):** δ 12.41 (br, 1H), 11.44 (s, 1H), 8.26 (s, 1H), 7.73 (dd, *J* = 8.6, 1.5 Hz, 1H), 7.46 (dd, *J* =

5.9, 2.7 Hz, 2H), 6.98 – 6.33 (m, 1H). **<sup>13</sup>C NMR (126 MHz, DMSO-*d*<sub>6</sub>):** δ 169.18, 138.82, 127.66, 127.41, 123.39, 122.74, 121.74, 111.68, 103.11.

### 3.5 Unsuccessful examples

In addition to the above examples, other aryl halides bearing various functional groups, heteroaromatic halides, and alkenyl/alkyl halides were investigated under the standard reaction conditions. Unfortunately, we failed to get a satisfying yield both in the formylation and carboxylation reactions.

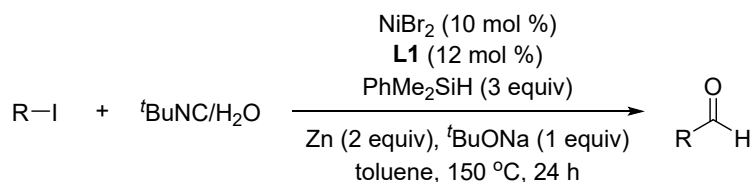

Trace or low yield

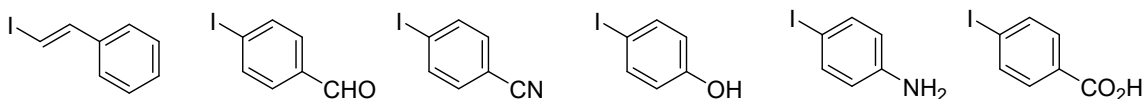

No reaction

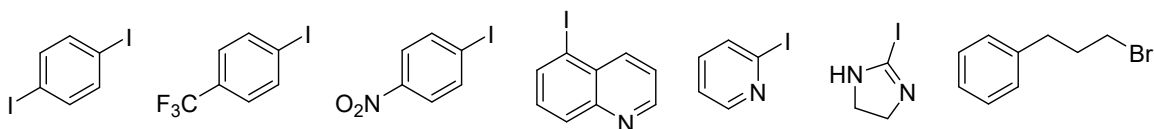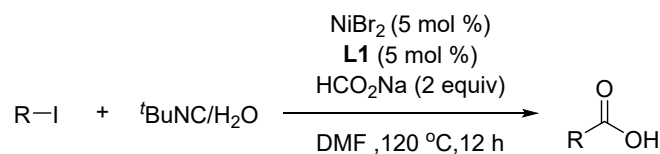

Trace or low yield

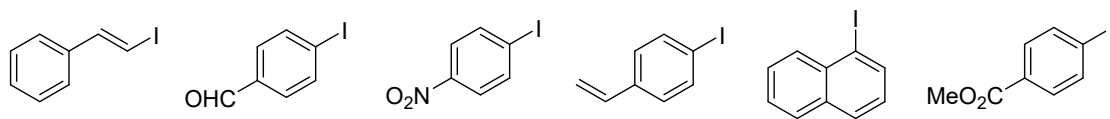

No reaction

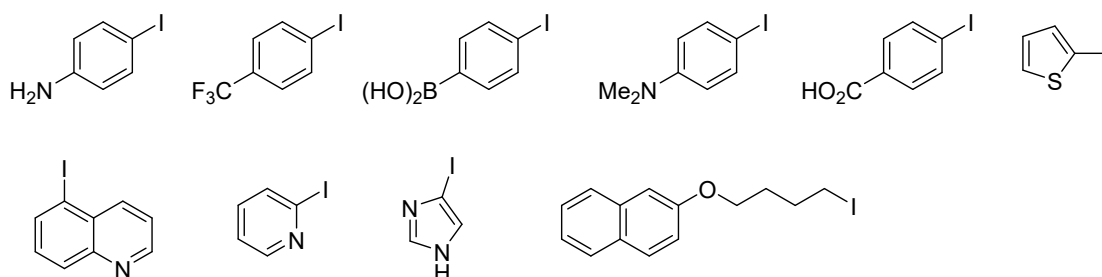

## 4. Mechanistic studies

### 4.1 Investigation of the possible intermediate in the carboxylation reaction

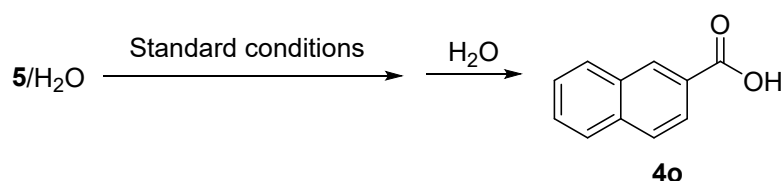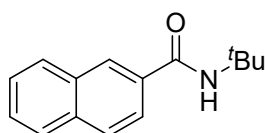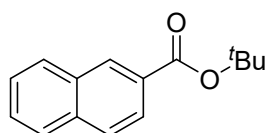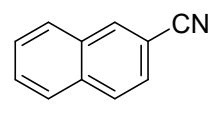

#### Experimental procedure:

Under the positive nitrogen atmosphere, **5** (0.4 mmol), NiBr<sub>2</sub> (5 mol%, 4.4 mg), 2,2-bipyridine **L1** (5 mol%, 3.1 mg), HCO<sub>2</sub>Na (0.8 mmol, 54.4 mg), and DMF (1 mL) were added to 25-mL Schlenk tube. The reaction mixture was stirred at 120 °C for 12 hours. After the completion, H<sub>2</sub>O (2 ml) was added to the reaction mixture and no product **4o** was detected by TLC analysis.

### 4.2 Investigation of the other possible carbonyl sources

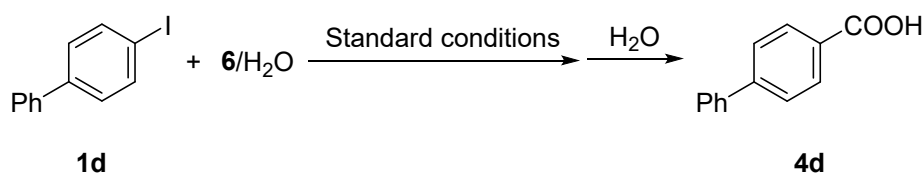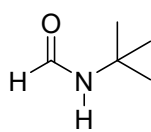

TMSCN

CuCN

CO (1 atm)

**6a: NR**

**6b: NR**

**6c: NR**

**6d: 40% (4d)**

#### Experimental procedure:

Under the positive nitrogen atmosphere, **1d** (0.4 mmol, 112 mg), NiBr<sub>2</sub> (10 mol%, 8.8 mg), **L1** (10 mol%, 6.2 mg), HCO<sub>2</sub>Na (0.8 mmol, 54.4 mg), **6a-d** (0.6 mmol, **6d**: CO balloon used) and DMF (1 mL) were added to 25-mL Schlenk tube. The reaction mixture was stirred at 120 °C for 12 hours. After the completion, H<sub>2</sub>O (2 ml) was added to the reaction mixture and only the reaction of **1d** with **6d** proceeded smoothly. The product was isolated in 40% yield.

### 4.3 Detection of *tert*-octylamine 7a

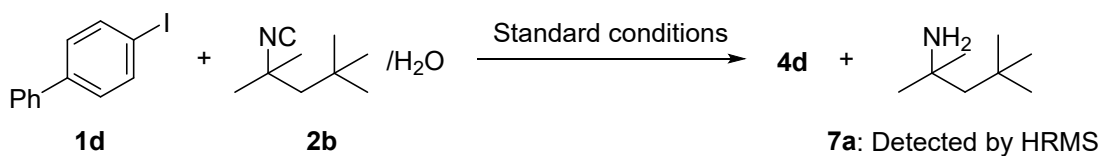

Under the positive nitrogen atmosphere, **1d** (0.4 mmol, 112 mg), **2b** (0.6 mmol, 83.4 mg), NiBr<sub>2</sub> (5 mol%, 4.4 mg), **L1** (5 mol%, 3.1 mg), HCO<sub>2</sub>Na (0.8 mmol, 54.4 mg), H<sub>2</sub>O (2 mmol, 40 mg) and DMF (1 mL) were added to 25 mL Schlenk tube. The reaction mixture was stirred at 120 °C for 12 hours. After the completion, the reaction mixture was directly subjected to the HRMS analysis.

ZBW-20230220 #11 RT: 0.15 AV: 1 NL: 2.39E5  
T: FTMS (1,1) + p ESI Full ms [50.00-1000.00]

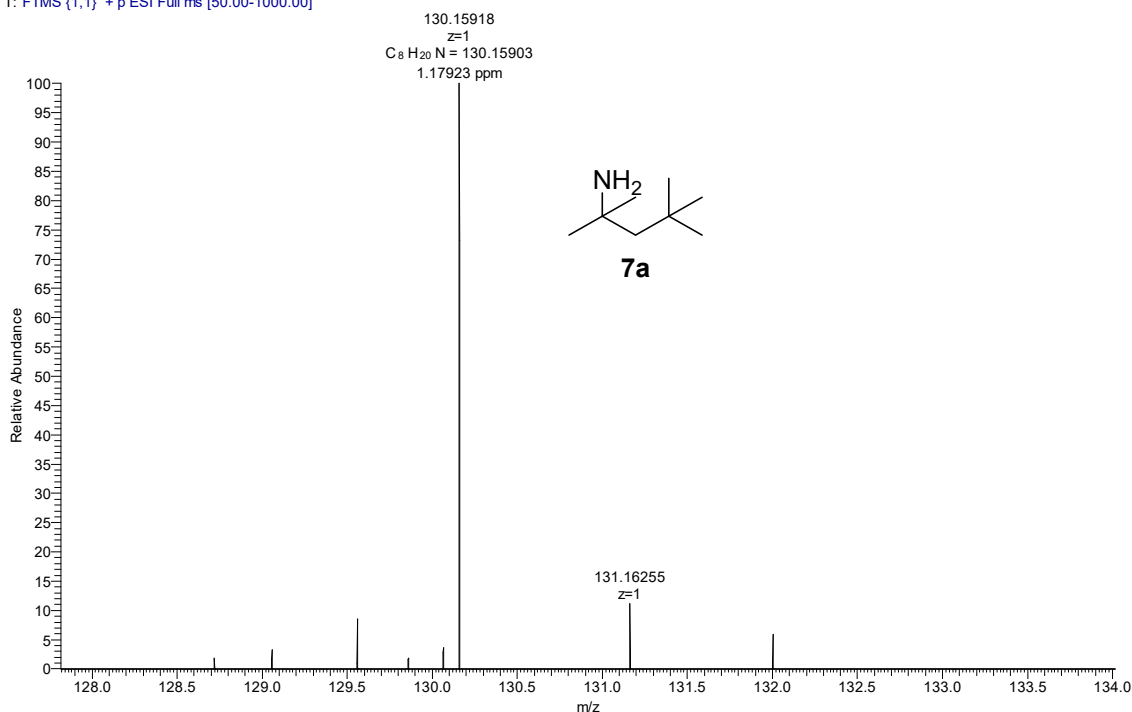

### 4.4 O<sup>18</sup>-labelling experiment

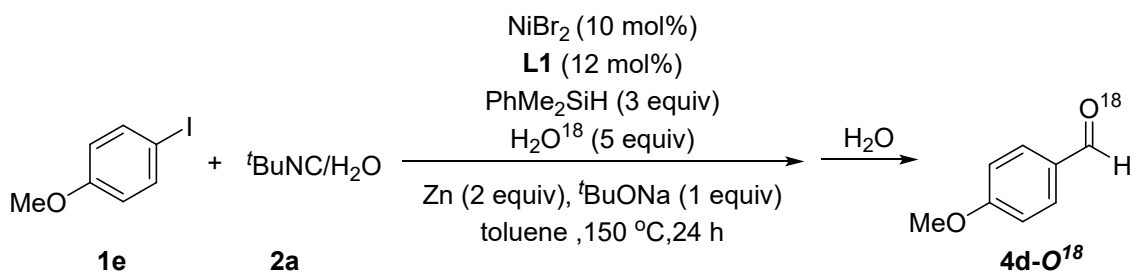

Under the positive nitrogen atmosphere, **1e** (0.4 mmol, 94 mg), **2a** (0.48 mmol, 40 mg), NiBr<sub>2</sub> (10 mol%, 8.8 mg), **L1** (12 mol%, 7.5 mg), PhMe<sub>2</sub>SiH (1.2 mmol, 163 mg),



Zn (0.8 mmol, 52 mg), <sup>t</sup>BuONa (0.4 mmol, 38.4 mg), H<sub>2</sub>O<sup>18</sup> (2 mmol, 40 mg) and toluene (1 mL) were added to 25 mL Schlenk tube. The reaction mixture was stirred at 150 r the completion,

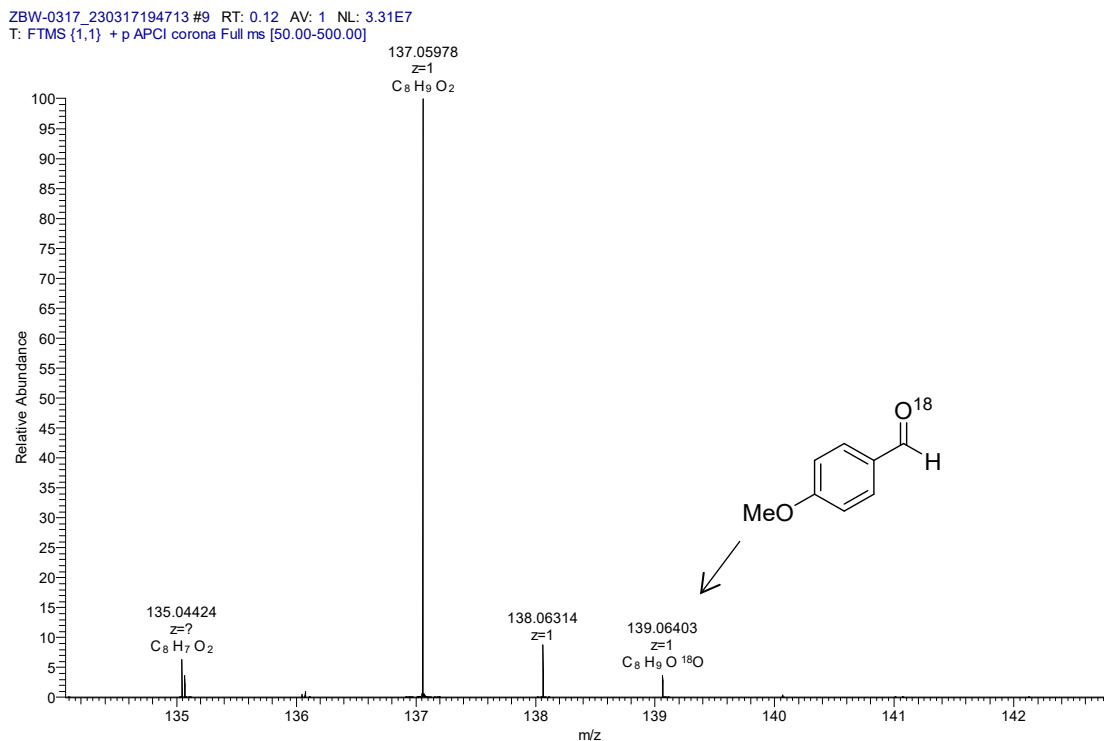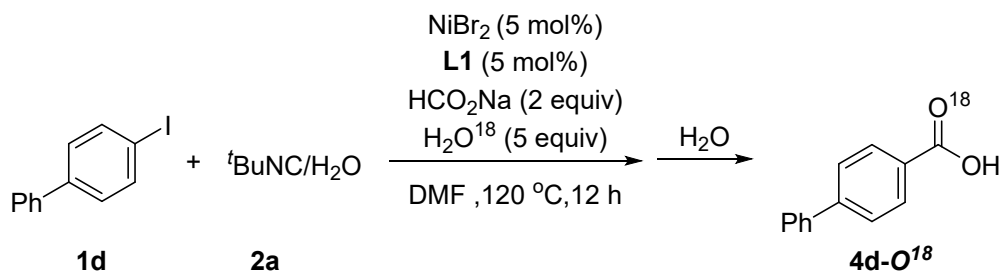

Under the positive nitrogen atmosphere, **1d** (0.4 mmol, 112 mg), NiBr<sub>2</sub> (5 mol%, 4.4 mg), **L1** (5 mol%, 3.1 mg), HCO<sub>2</sub>Na (0.8 mmol, 54.4 mg), H<sub>2</sub>O<sup>18</sup> (2 mmol, 40 mg) and DMF (1 mL) were added to 25 mL Schlenk tube. The reaction mixture was stirred at 120 °C for 12 hours. After the completion, the product was isolated in 75% yield and subjected to the HRMS analysis.

MHY-180 #14 RT: 0.18 AV: 1 NL: 2.21E6  
T: FTMS (1,2) -p ESI Full ms [100.00-1000.00]

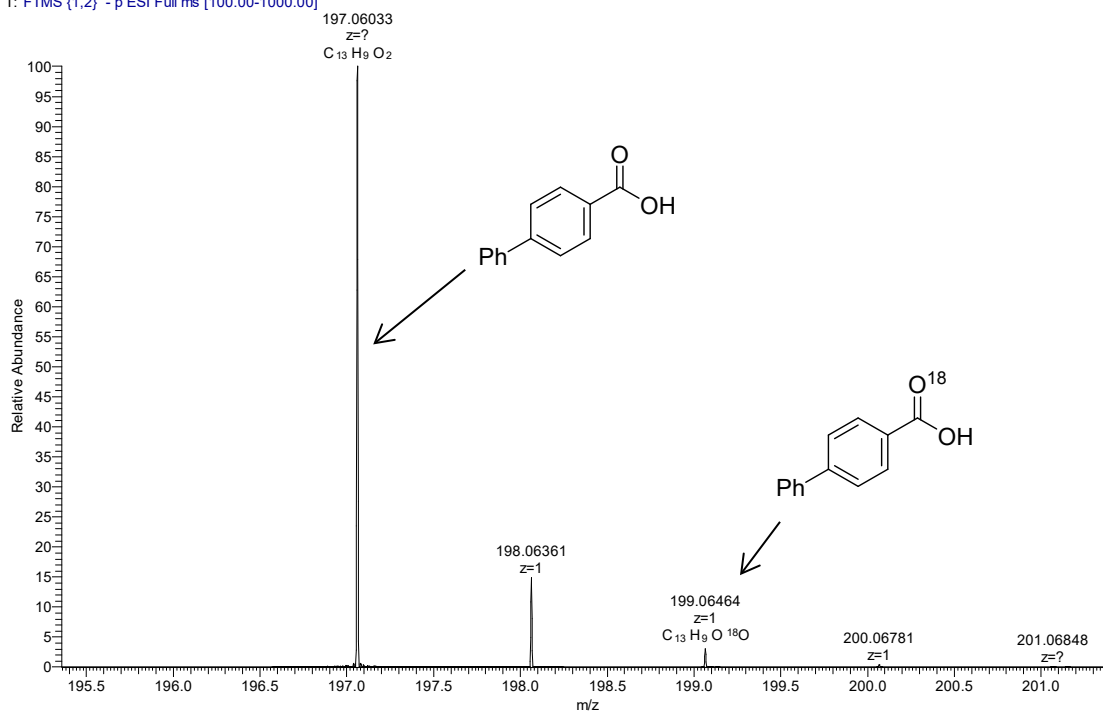

#### 4.5 Deuterium-labelling experiment

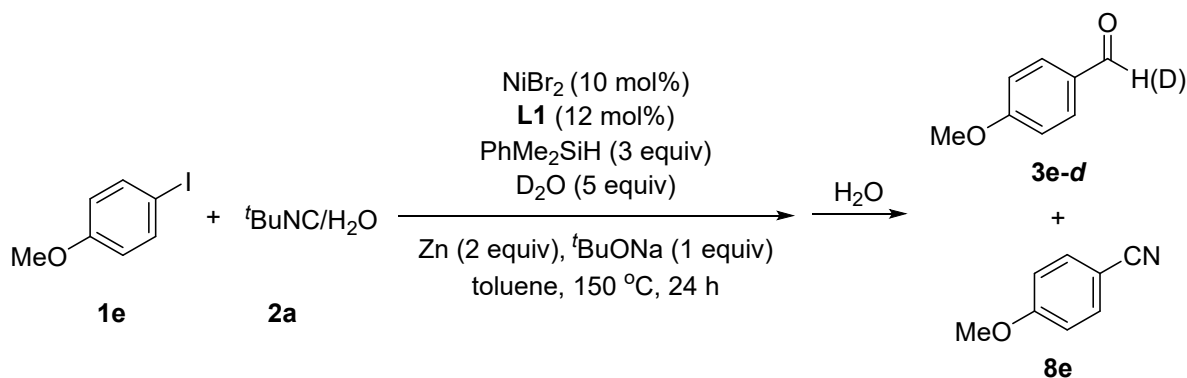

Under the positive nitrogen atmosphere, **1e** (0.4 mmol, 94 mg), **2a** (0.48 mmol, 40 mg), NiBr<sub>2</sub> (10 mol%, 8.8 mg), L1 (12 mol%, 7.5 mg), PhMe<sub>2</sub>SiH (1.2 mmol, 163 mg), Zn (0.8 mmol, 52 mg), <sup>t</sup>BuONa (0.4 mmol, 38.4 mg), D<sub>2</sub>O (2 mmol, 40 mg) and toluene (1 mL) were added to 25 mL Schlenk tube. The reaction mixture was stirred at 150 °C for 24 hours. After the completion, the inseparable mixture of **3e-d** and **8e** was isolated and directly subjected to the <sup>1</sup>H NMR analysis.

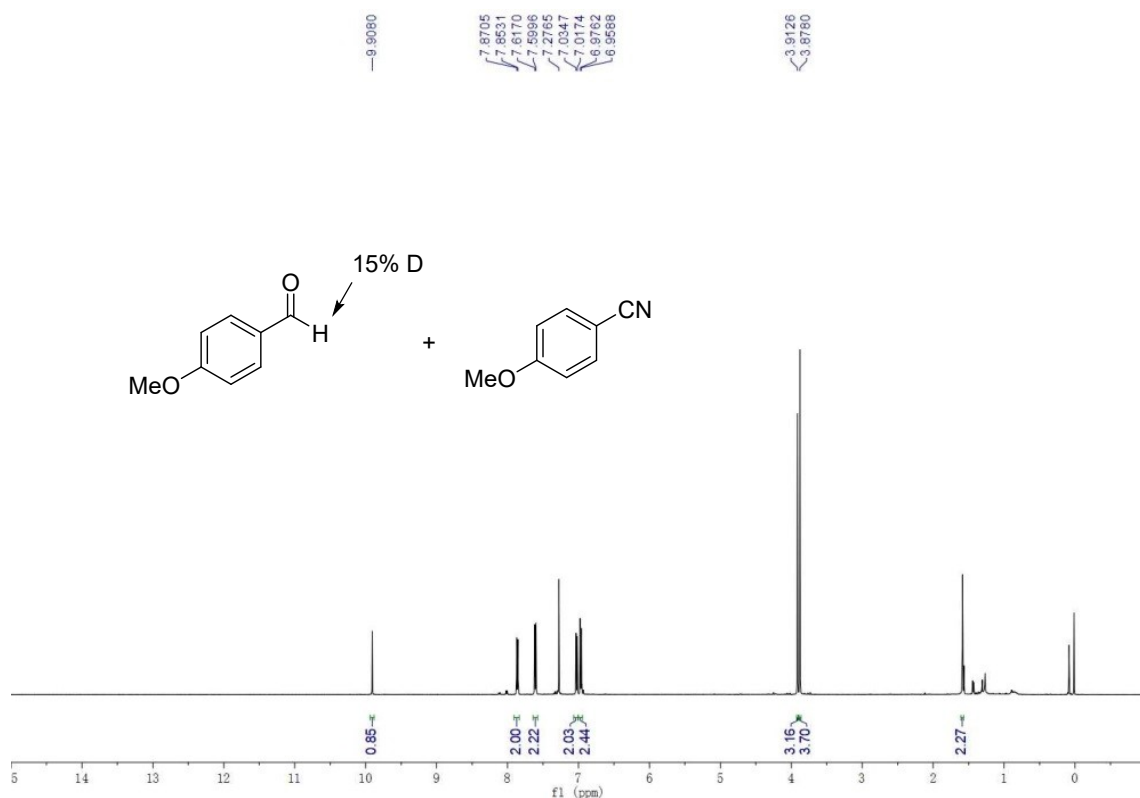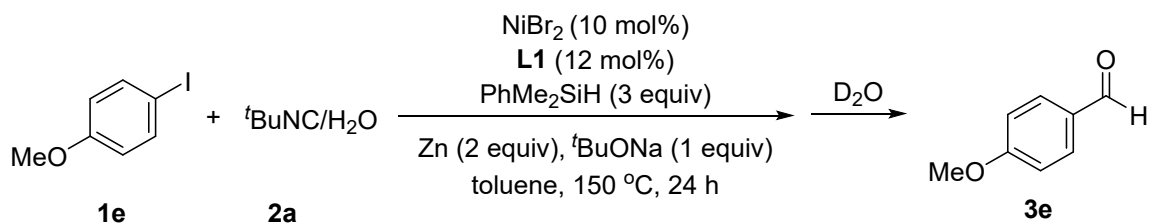

Under the positive nitrogen atmosphere, **1e** (0.4 mmol, 94 mg), **2a** (0.48 mmol, 40 mg), NiBr<sub>2</sub> (10 mol%, 8.8 mg), **L1** (12 mol%, 7.5 mg), PhMe<sub>2</sub>SiH (1.2 mmol, 163 mg), Zn (0.8 mmol, 52 mg), <sup>t</sup>BuONa (0.4 mmol, 38.4 mg) and toluene (1 mL) were added to 25 mL Schlenk tube. The reaction mixture was stirred at 150 °C for 24 hours. After the completion, D<sub>2</sub>O (2 mmol, 40 mg) was added to the 25 mL Schlenk tube and the reaction mixture was stirred at 150 °C for 1 hours. The product was isolated in 70% yield and characterized by <sup>1</sup>H NMR analysis.

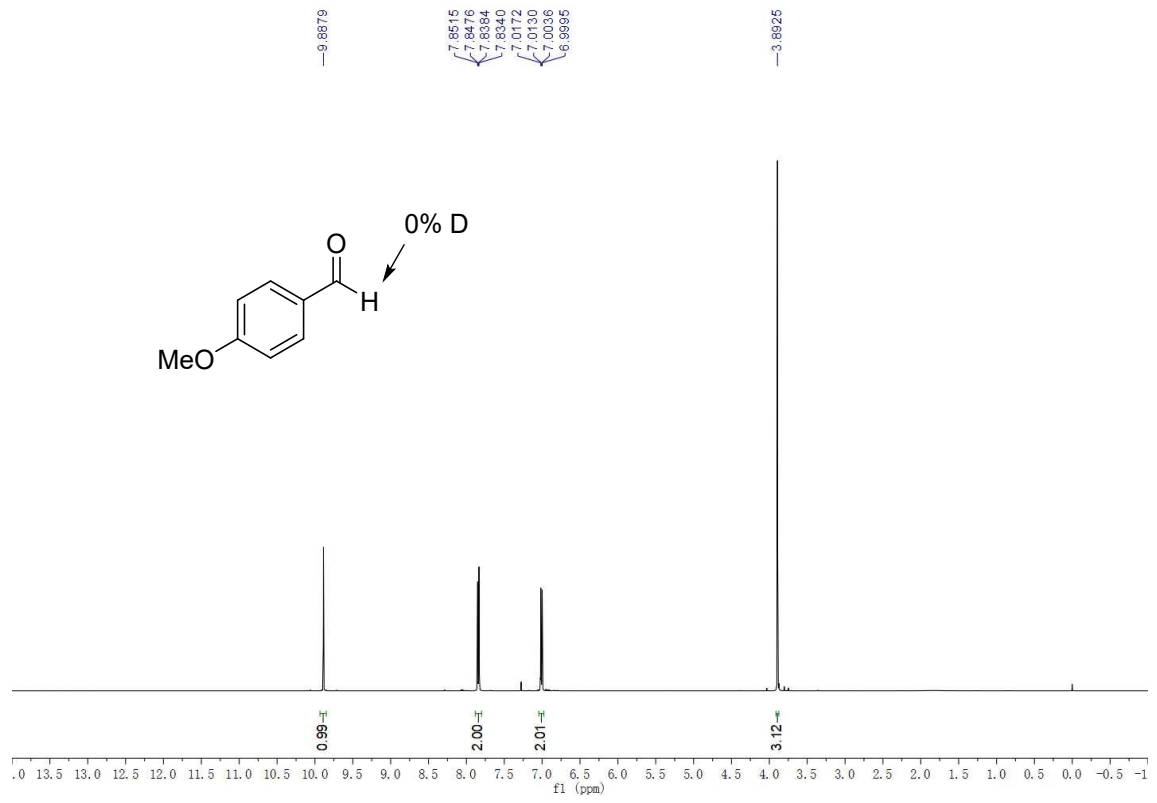

## 5. References

- [1] X. Jiang, J. Wang, Y. Zhang, Z. Chen, Y. Zhu, and S. Ji, *Org. Lett.*, 2014, **16**, 3492.
- [2] L. Ashfield and C. F. J. Barnard, *Org. Process. Res. Dev.*, 2007, **11**, 39.
- [3] F. Tobita, T. Yasukawa, Y. Yamashita and S. Kobayashi, *Catal. Sci. Technol.*, 2022, **12**, 1043.
- [4] P. Thiruvengadam and D. K. Chand, *J. Org. Chem.*, 2022, **87**, 6, 4061.
- [5] Z. Wu, H. Jiang, Y. Zhang, *Chem. Sci.*, 2021, **12**, 8531.
- [6] Z. Wei, S. Ru, Q. Zhao, H. Yu, G. Zhang and Y. Wei, *Green Chem.*, 2019, **21**, 4069.
- [7] J. Fetter, F. Bertha, L. Poszavacz, G. Simig, *J. Heterocyclic Chem.*, 2005, **42**, 137.
- [8] L. J. Gooßen, B. A. Khan, T. Fett and M. Treu, *Adv. Synth. Catal.*, 2010, **352**, 2166.
- [9] H. Yu, J. Ren, Y. Xie, X. Su, A. Wang, L. Yan, F. Jiang and Y. Wei, *Green Chem.*, 2022, **24**, 6511.
- [10] H. Shi, J. Li, T. Wang, M. Rudolph and A. S. K. Hashmi, *Green Chem.*, 2022, **24**, 5835.
- [11] Z. Yang, W. Cheng, Z. Li, *Catal. Commun.*, 2018, **117**, 38.
- [12] T. M. E. Dine, R. Jimmidi, A. Diaconu, M. Fransolet, C. Michiels, J. D. Winter, E. Gillon, A. Imbert, T. Coenye and S. P. Vincent, *J. Med. Chem.* 2021, **64**, 19, 14728.
- [13] K. Liu, S. Jiang, L. Lu, L. Tang, S. Tang, H. Tang, Z. Tang, W. He and X. Xu, *Green Chem.*, 2018, **20**, 3038.
- [14] D. Hua and X. Jiang, *Green Chem.*, 2022, **24**, 124.
- [15] J. Xia, K. W. Cormier and C. Chen, *Chem. Sci.* 2012, **3**, 2240.

## 6. $^1\text{H}$ NMR Spectra

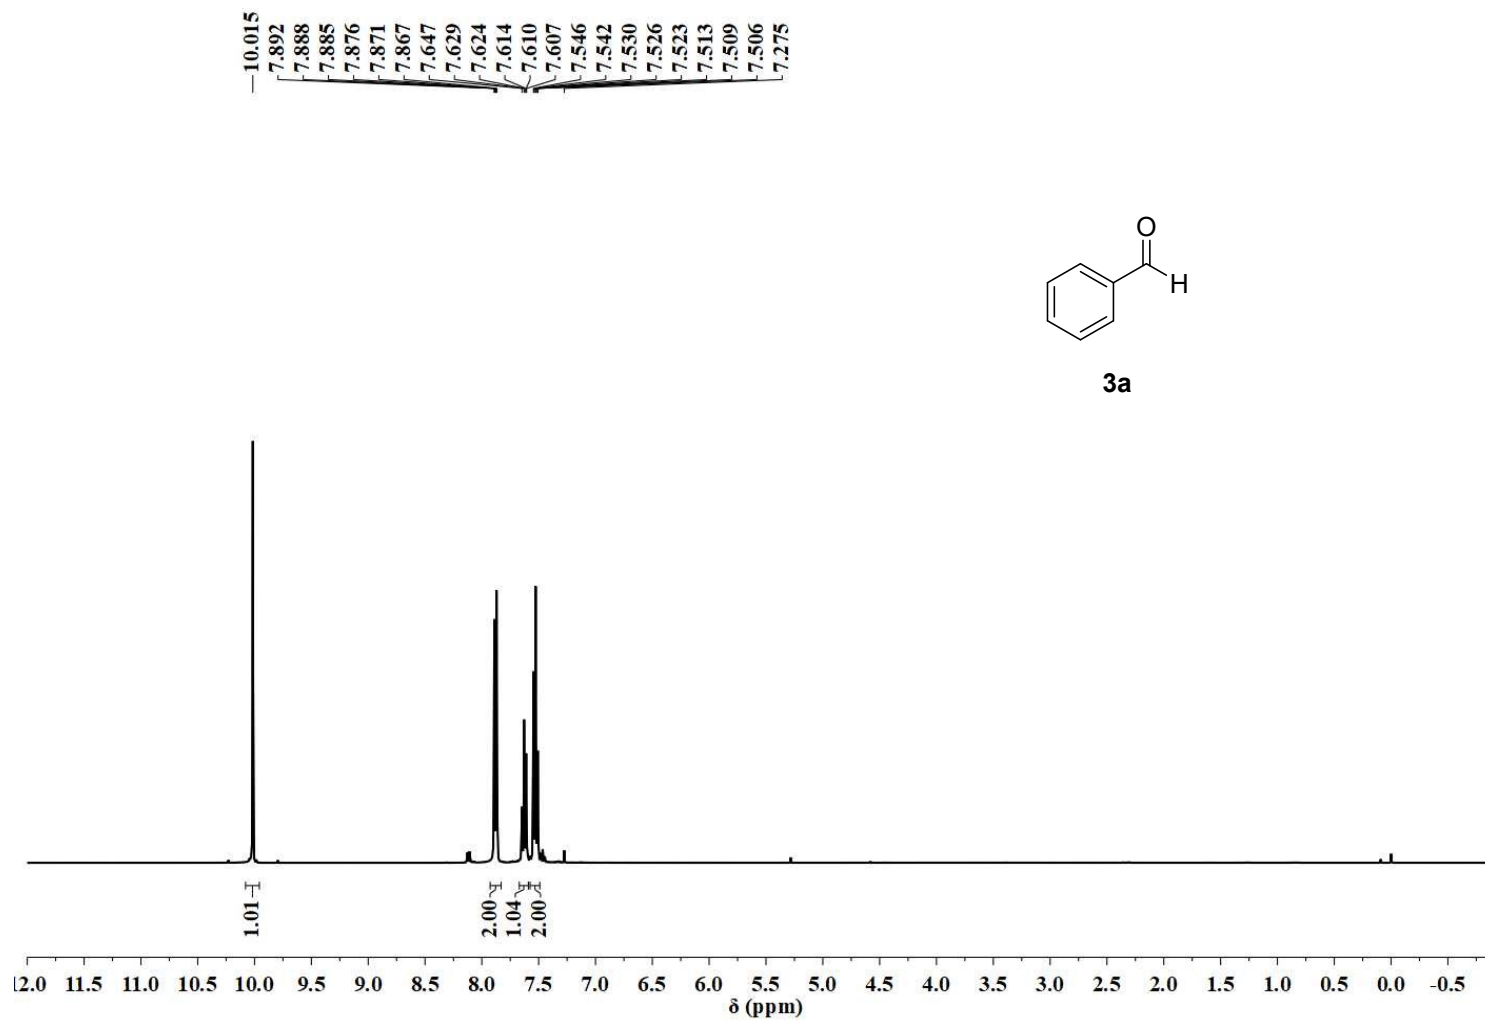

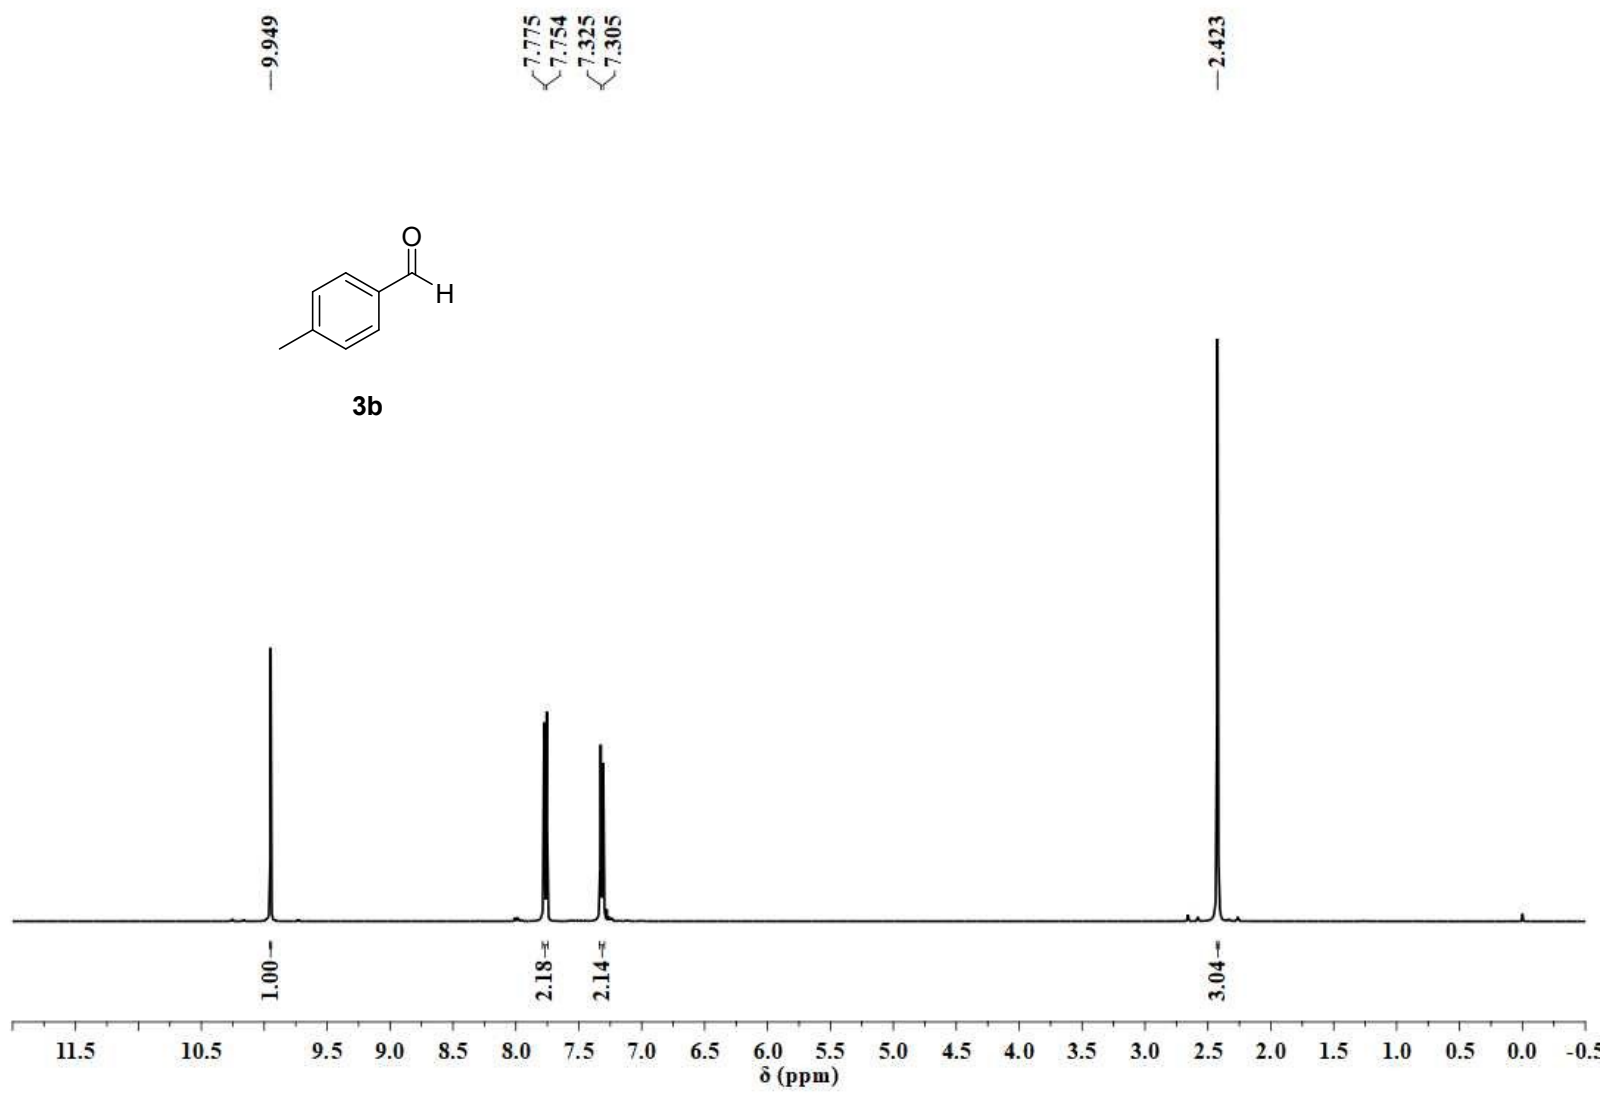

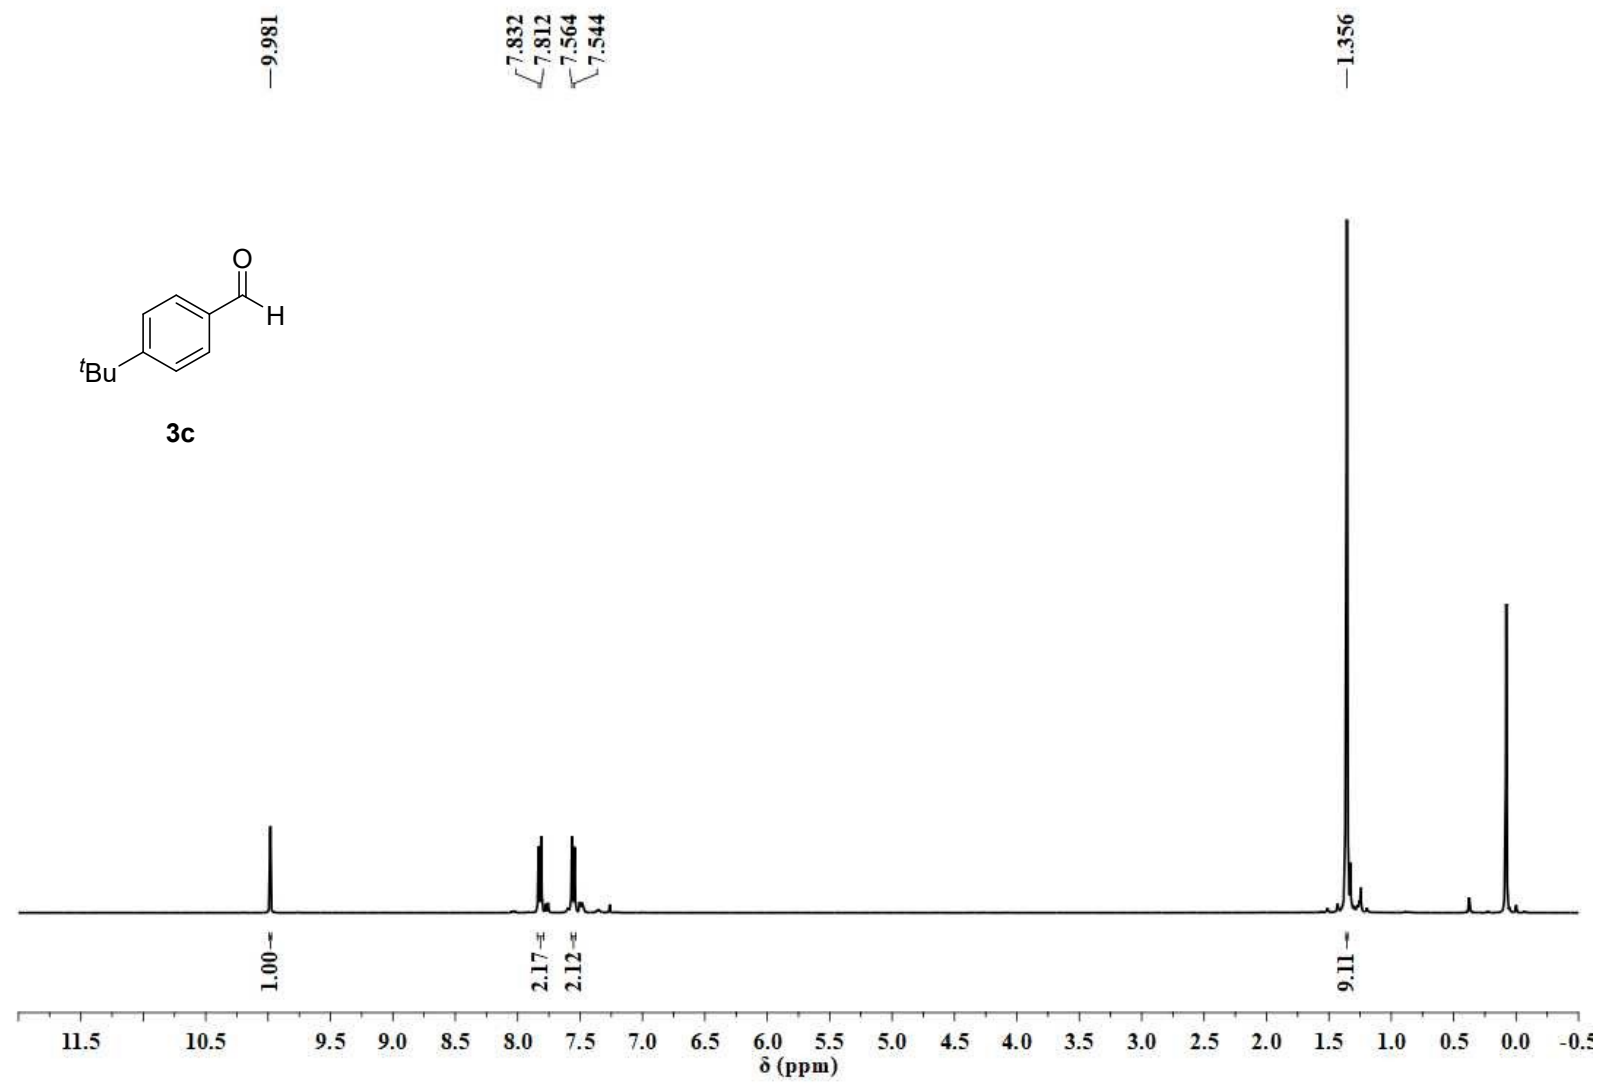



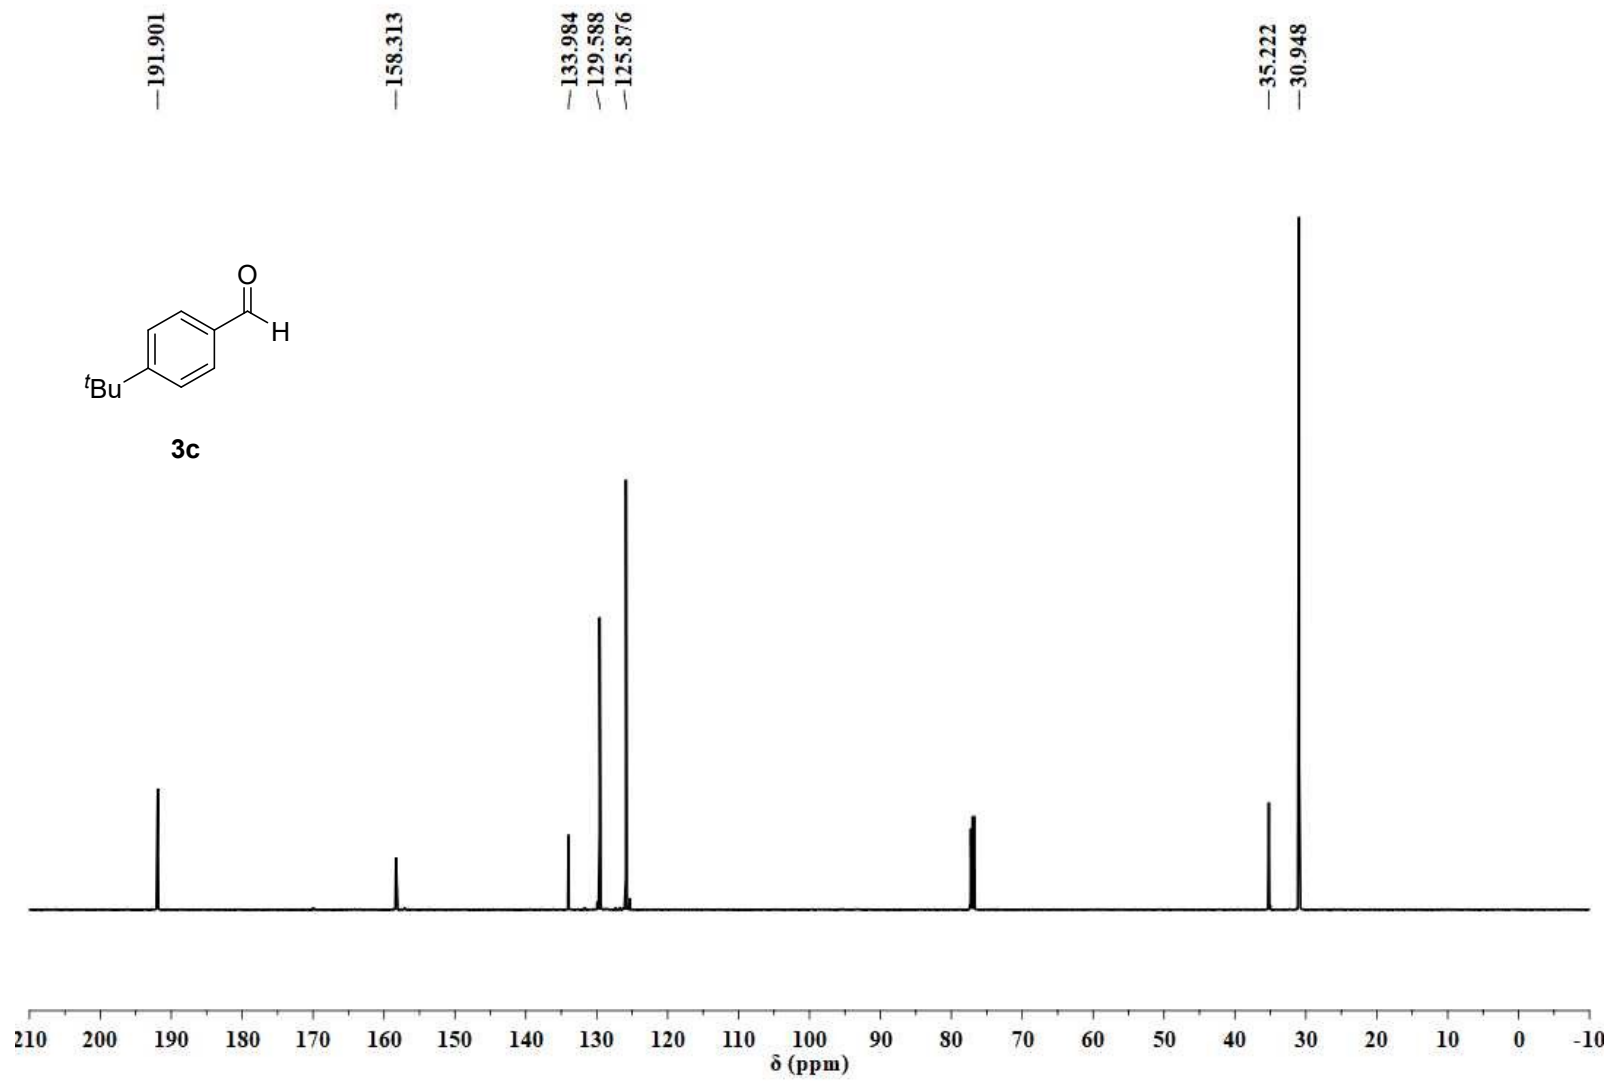

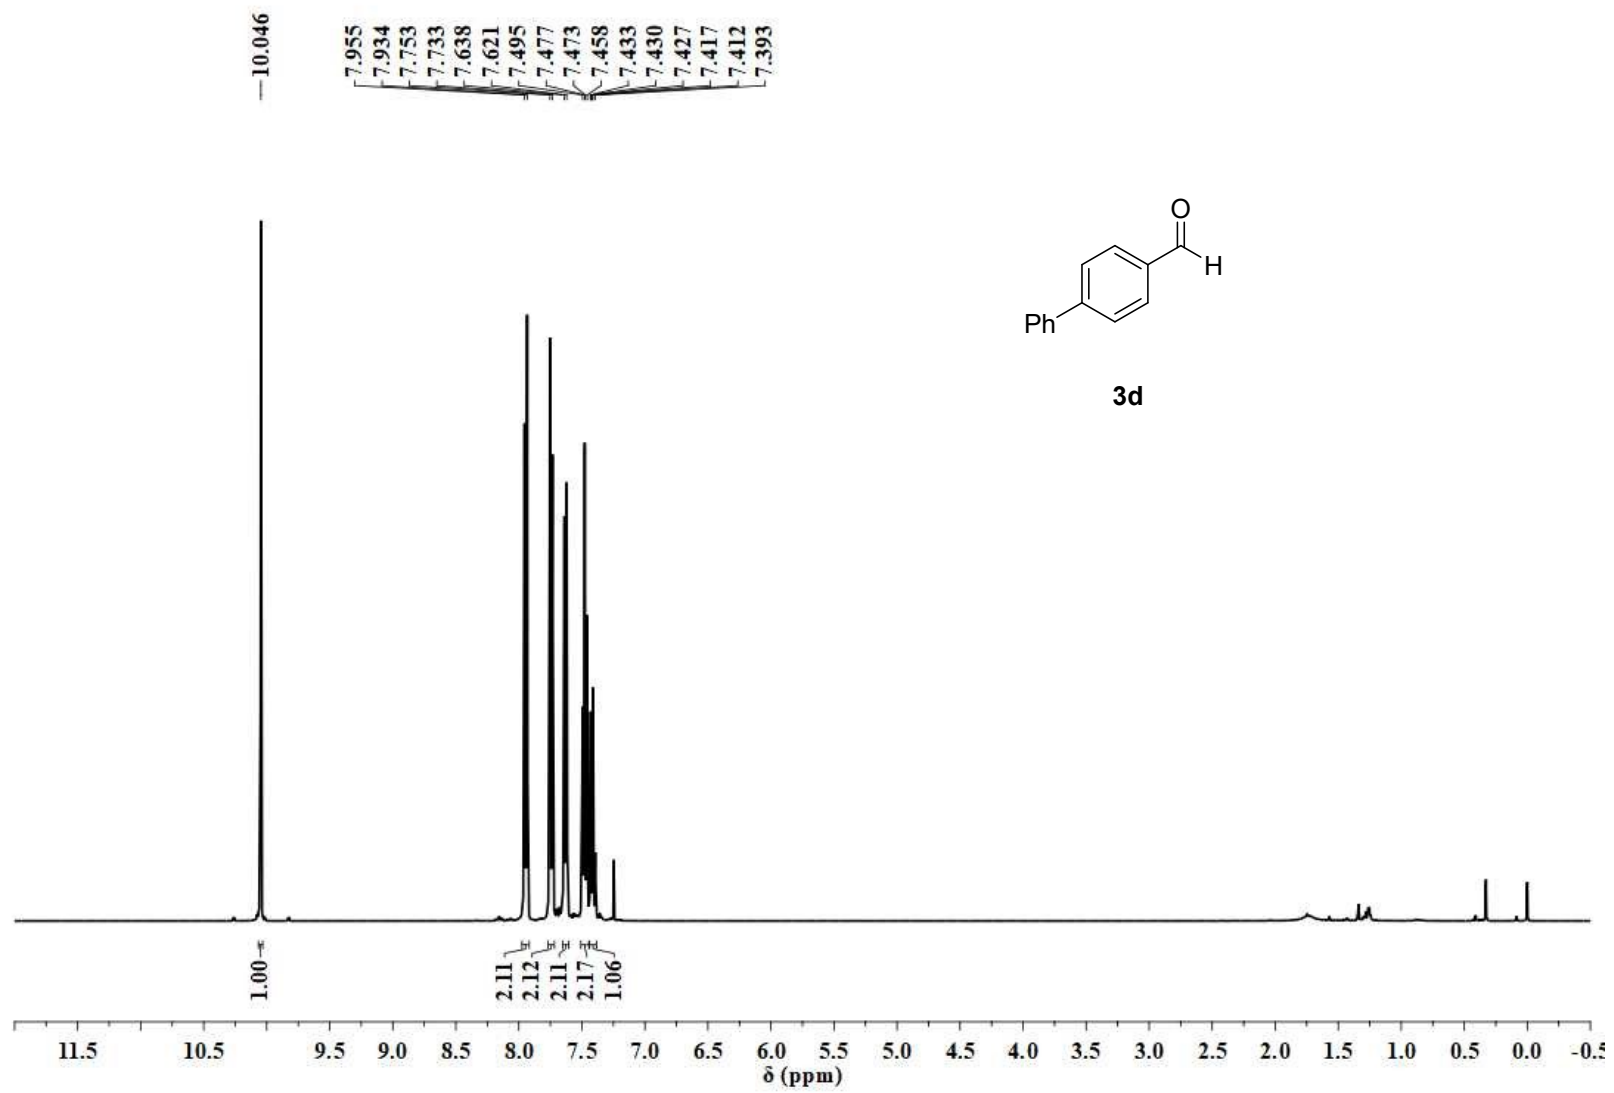

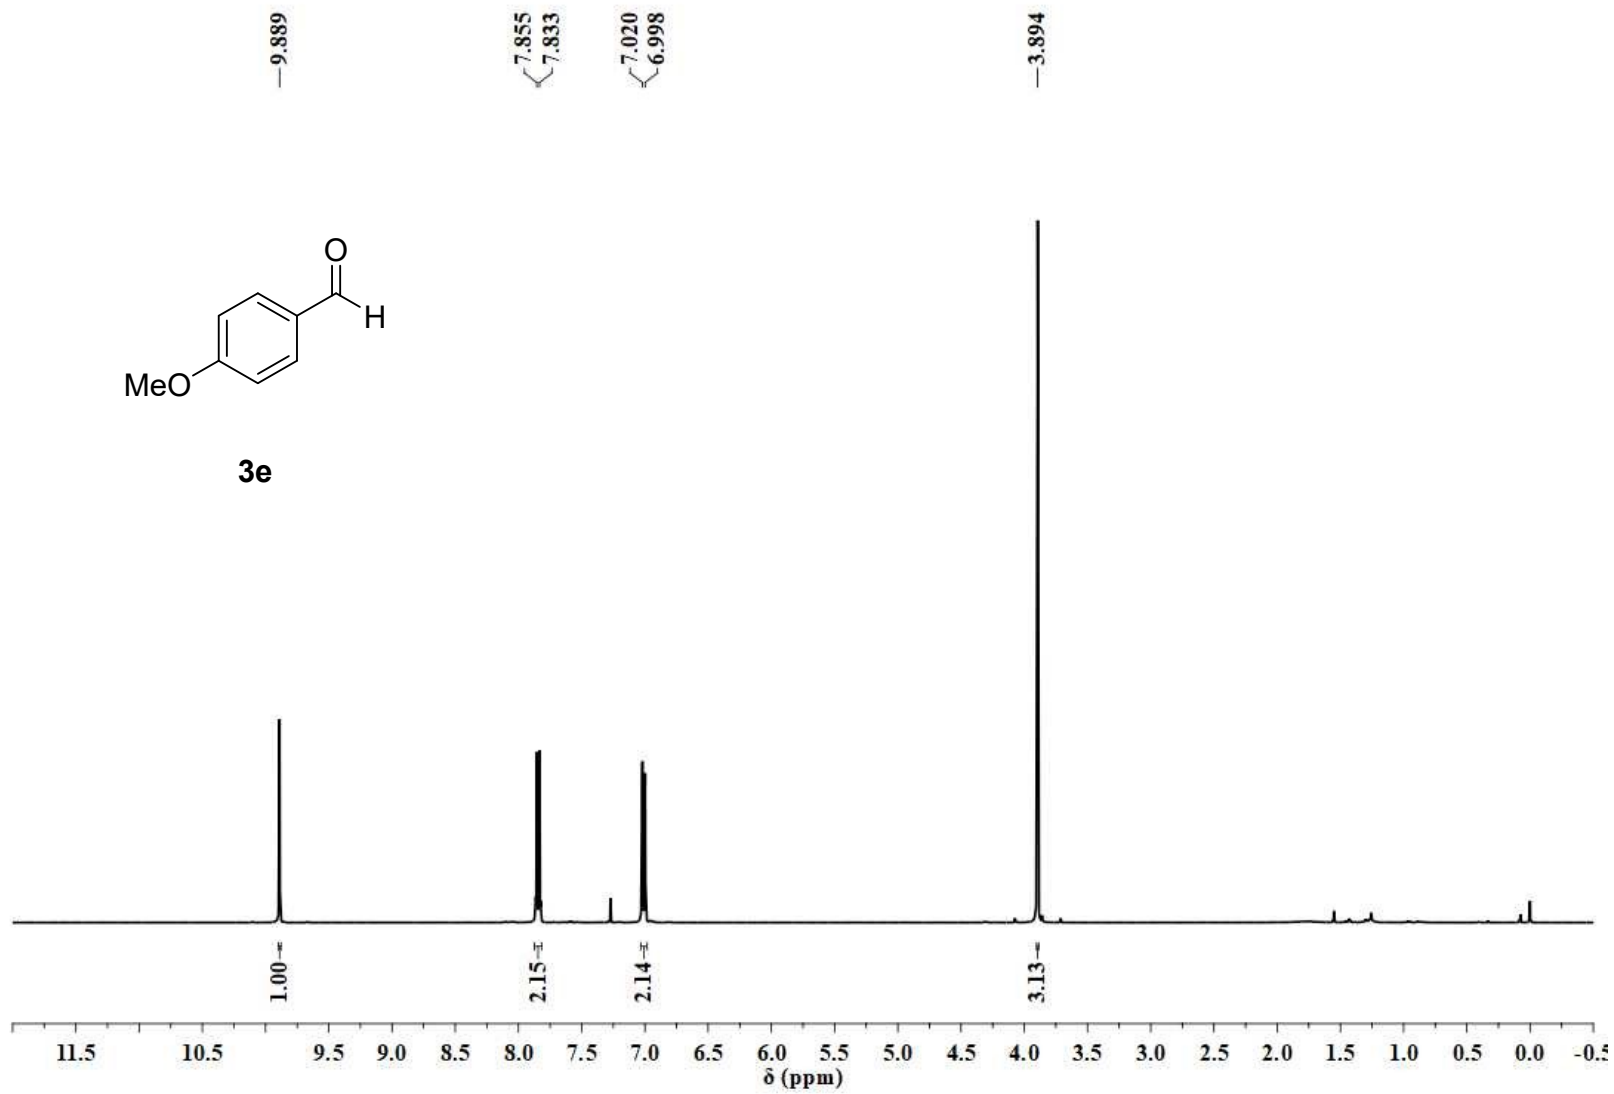

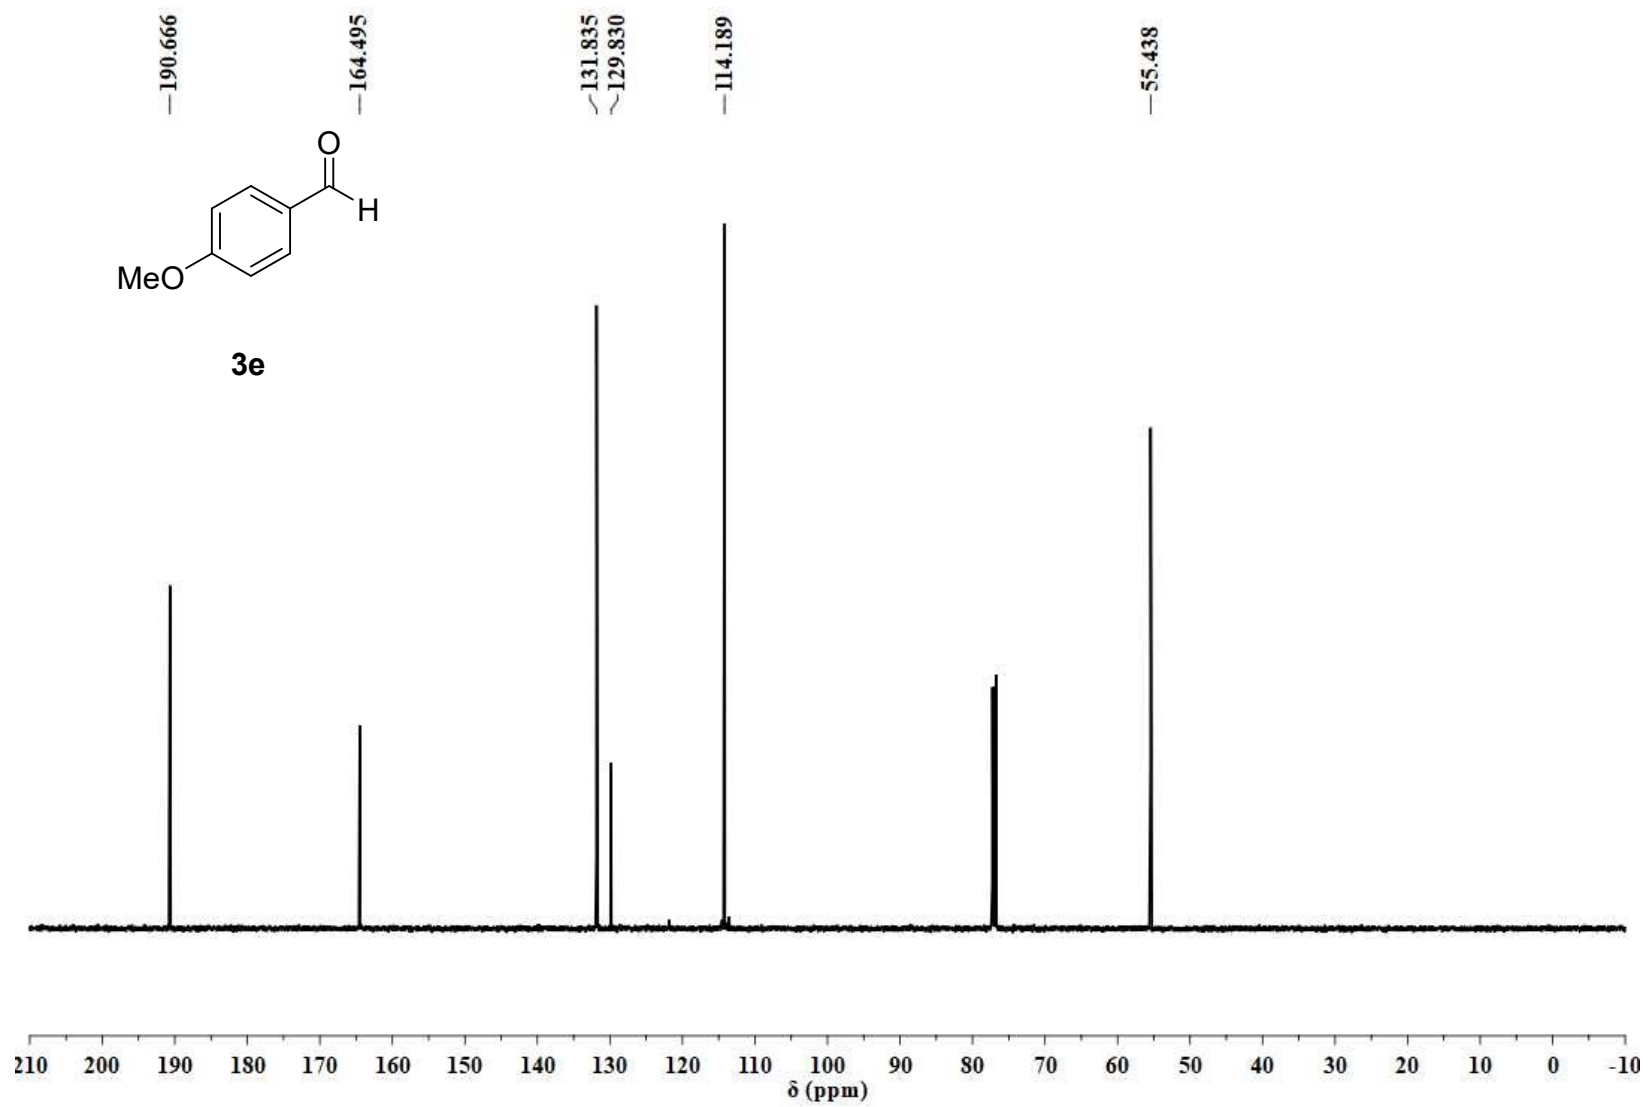

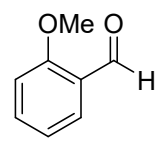

3f

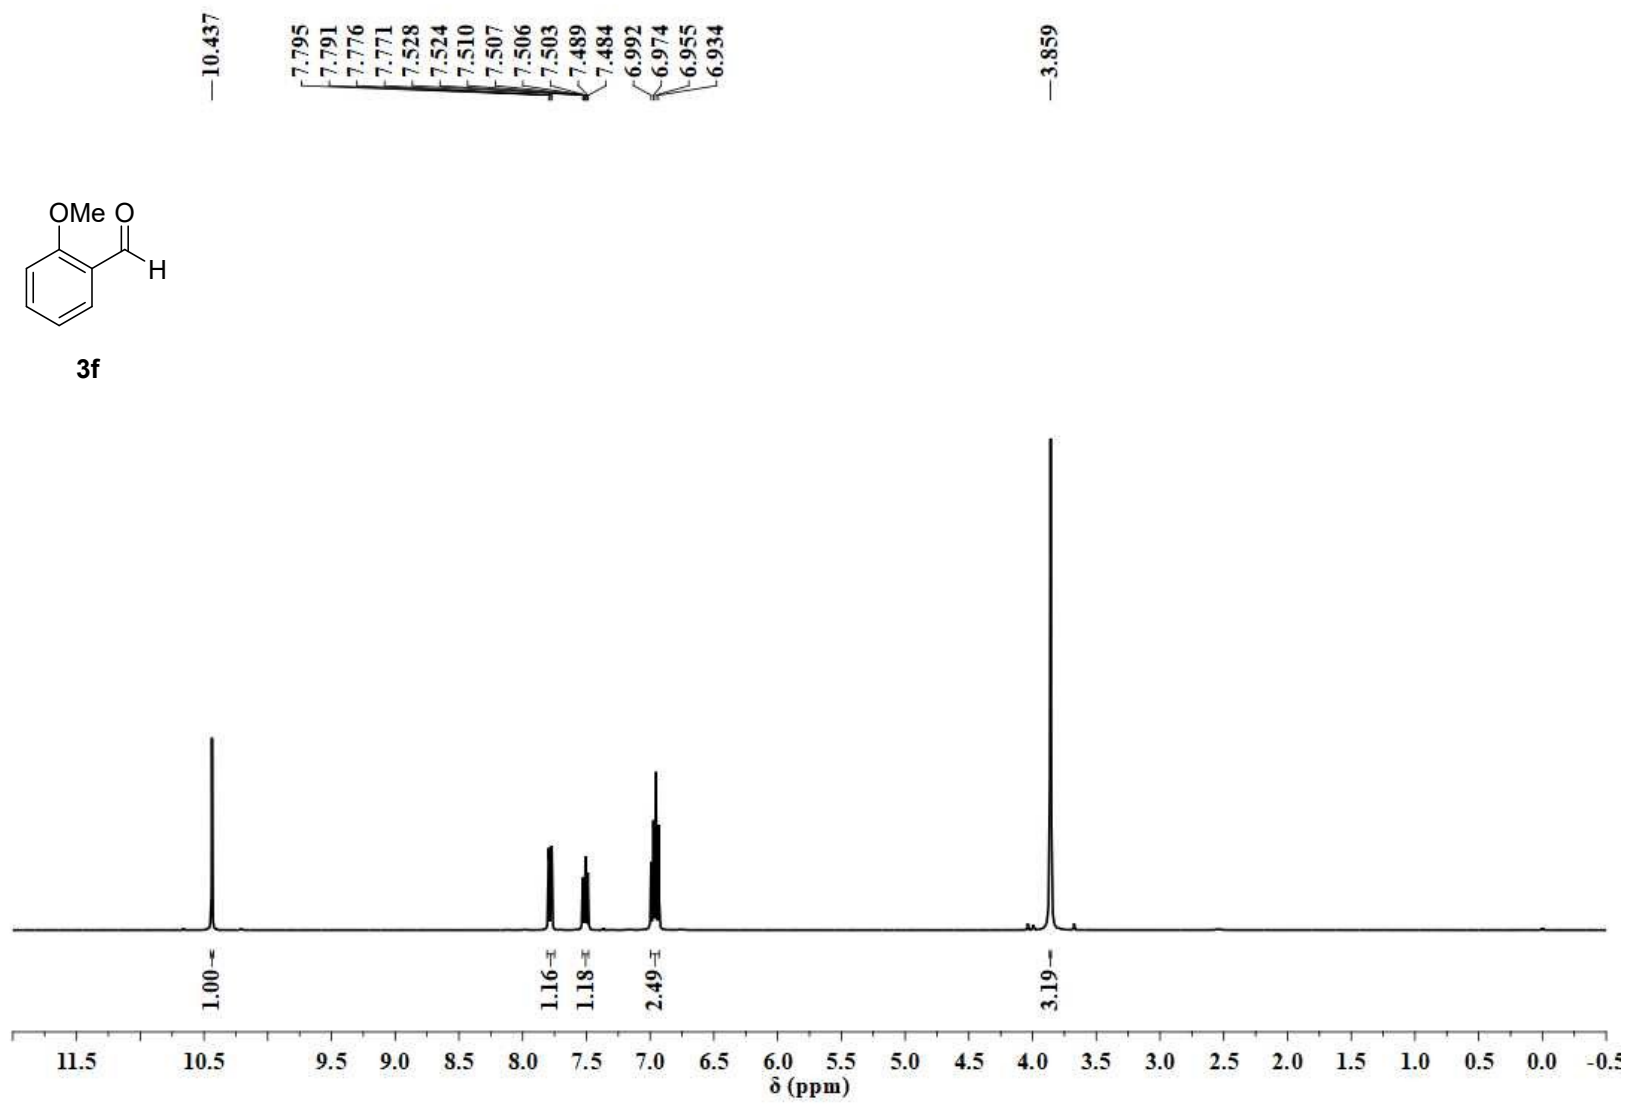

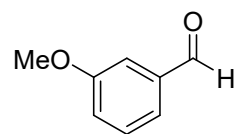

**3g**

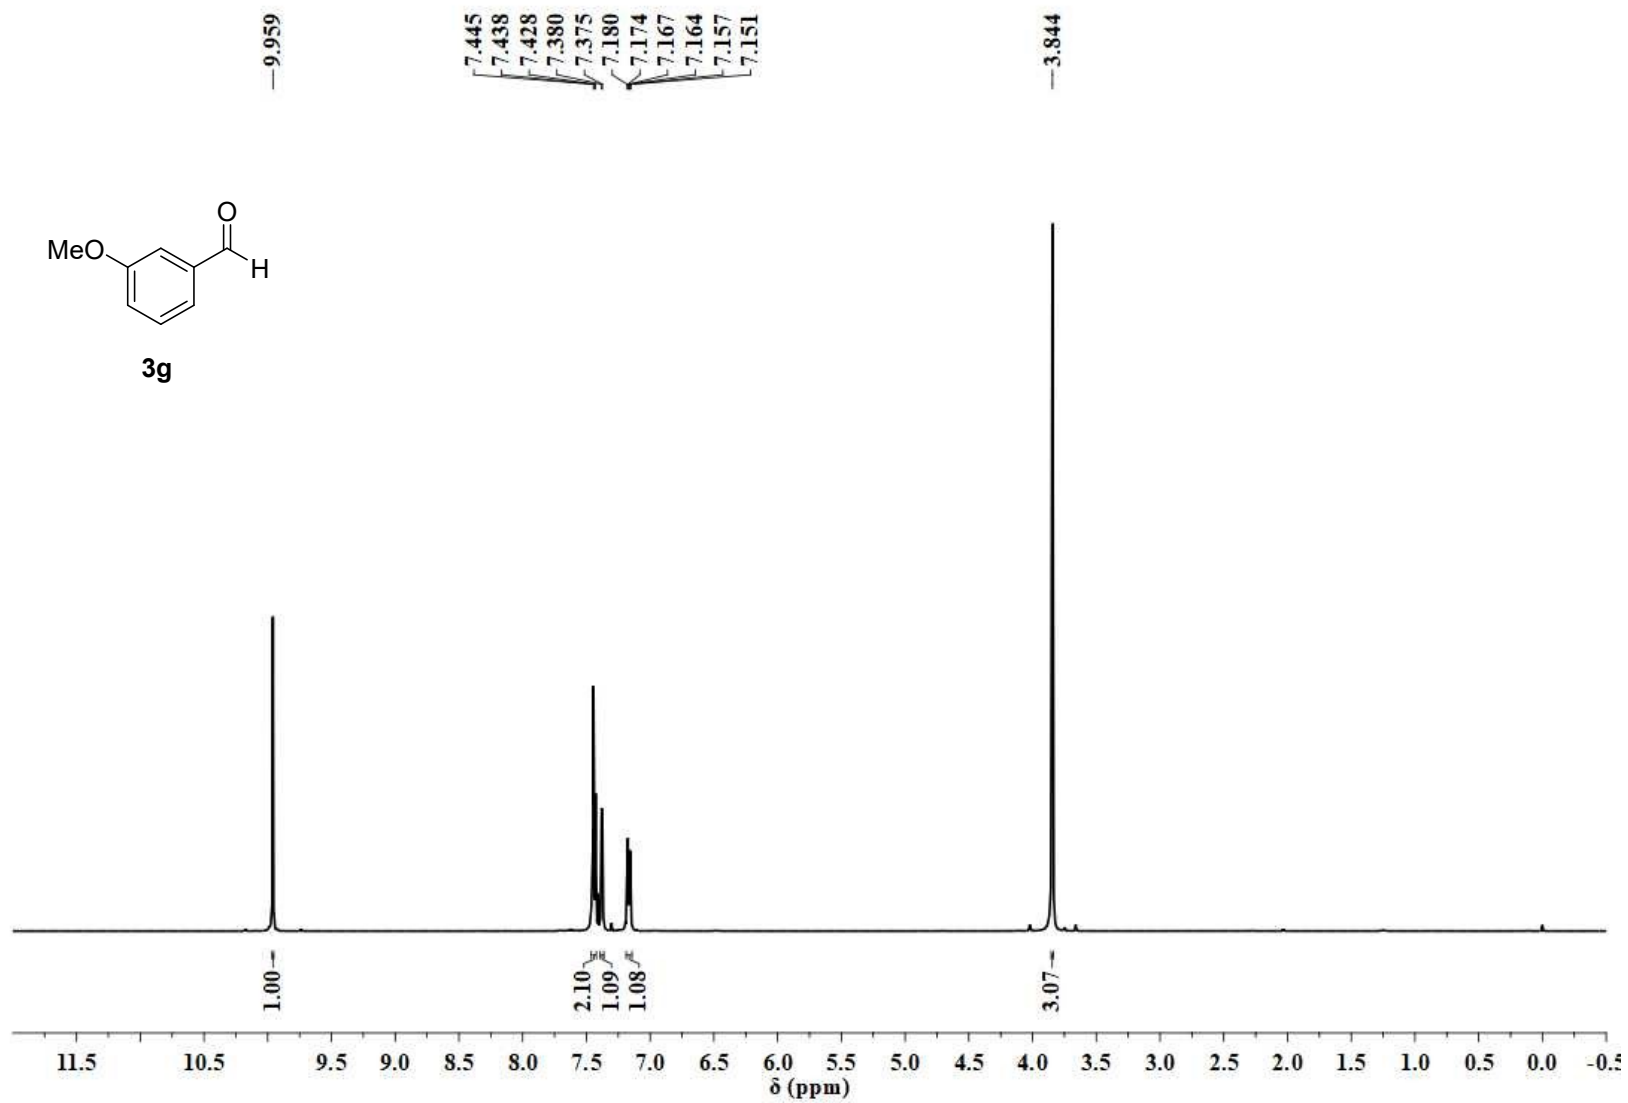

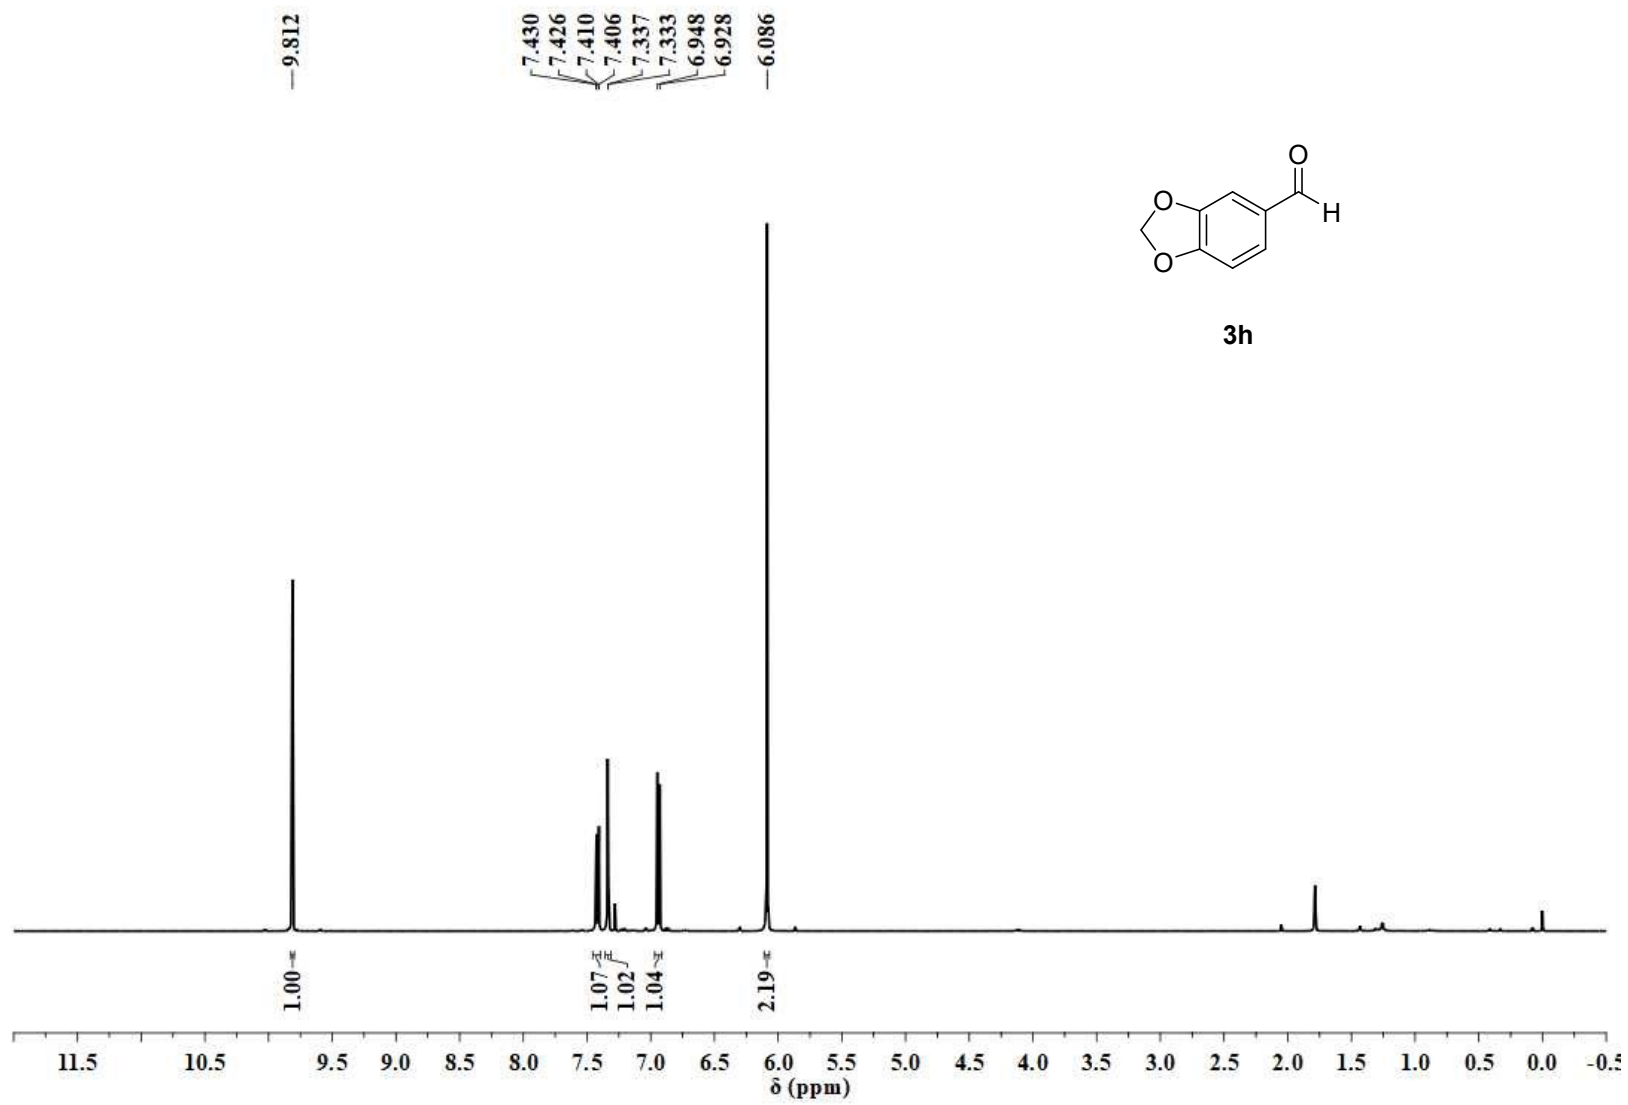

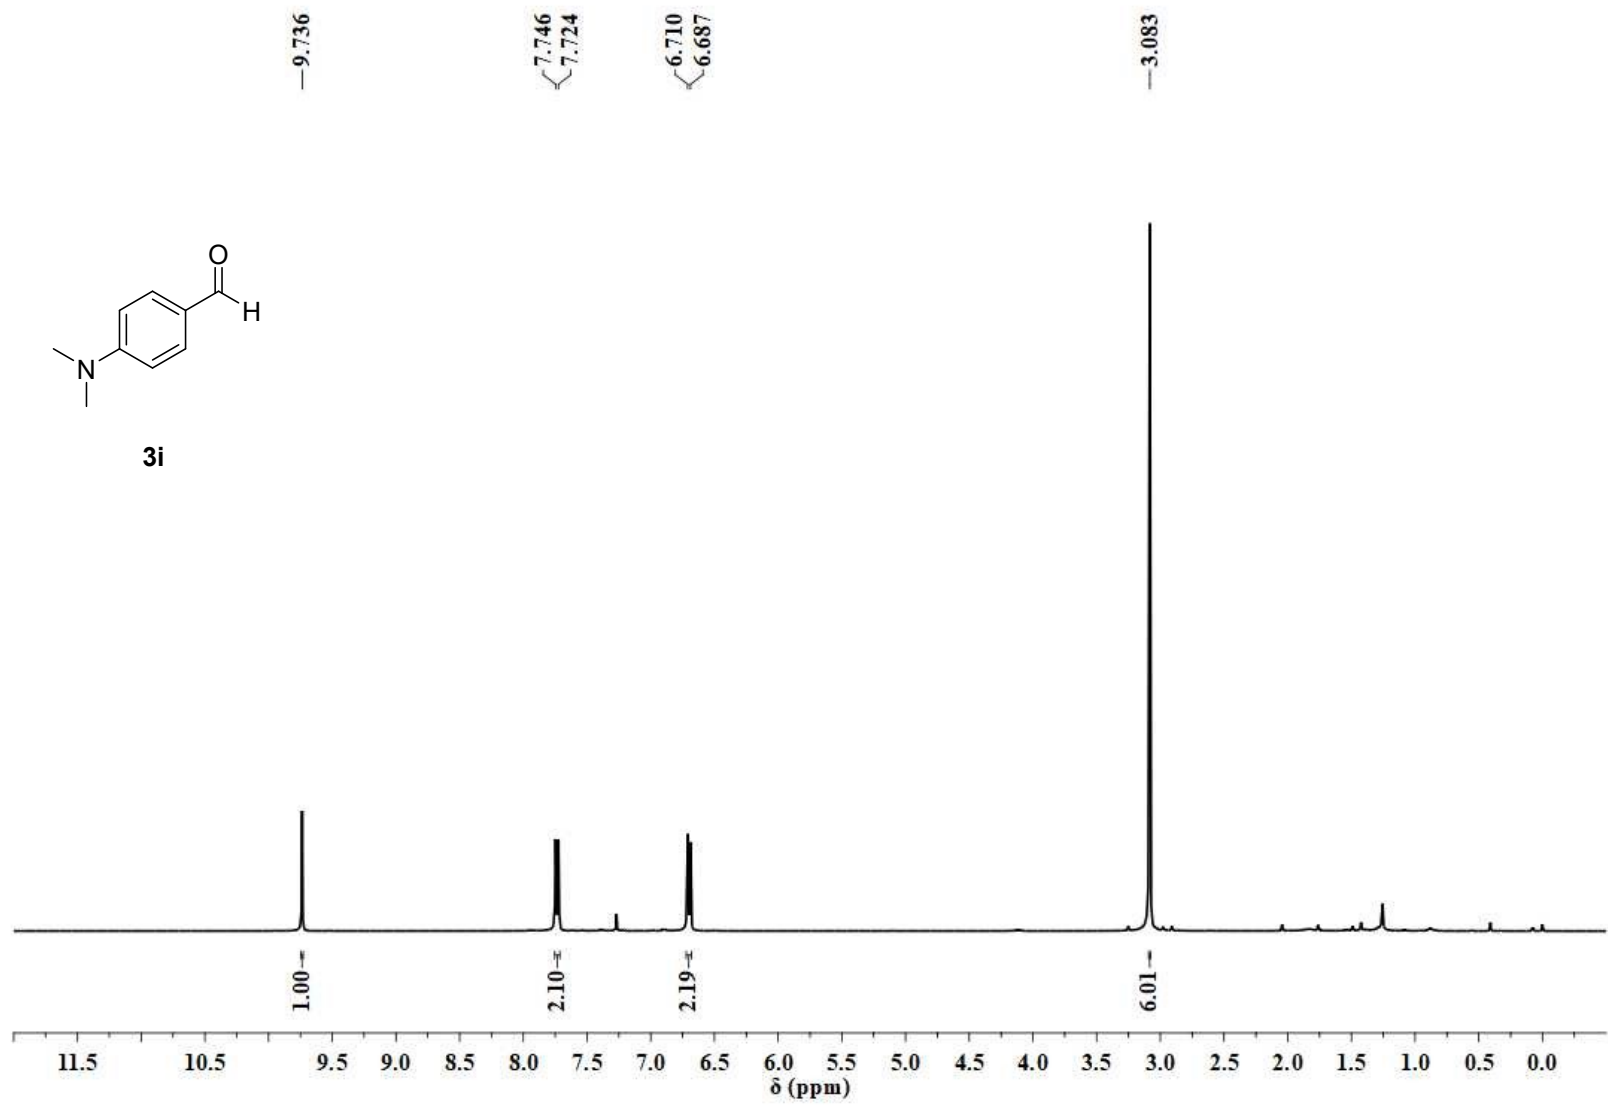



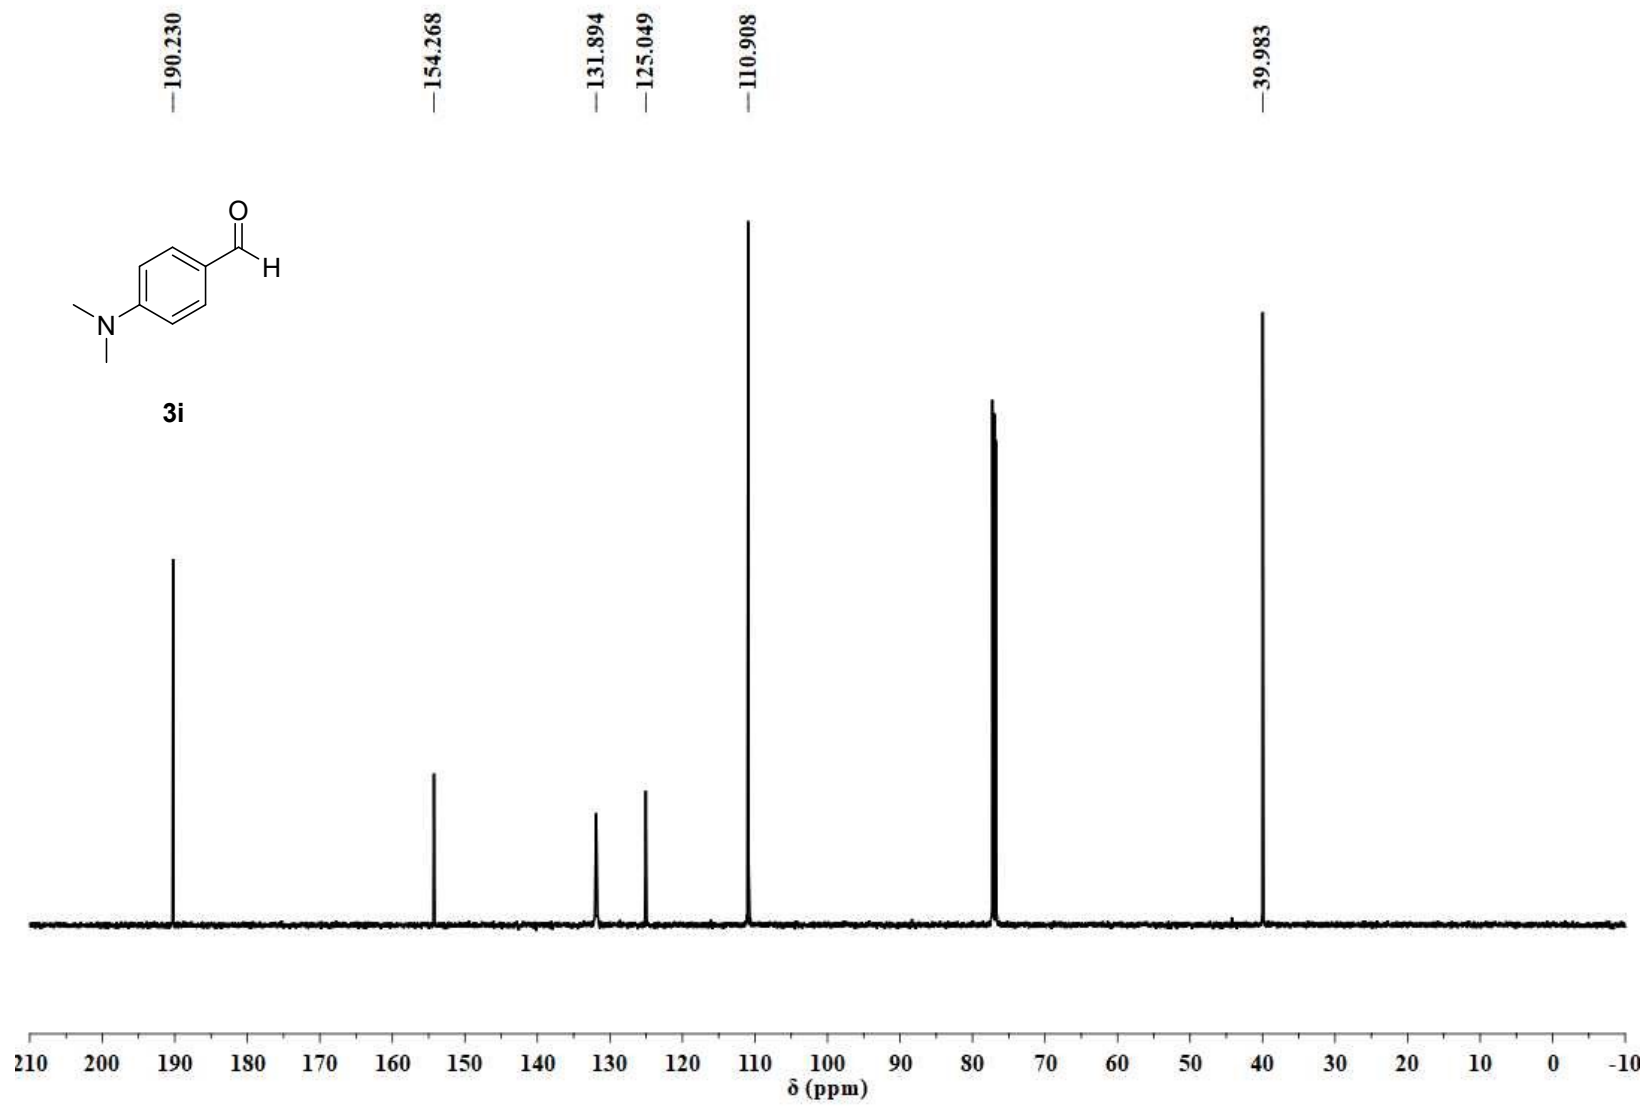

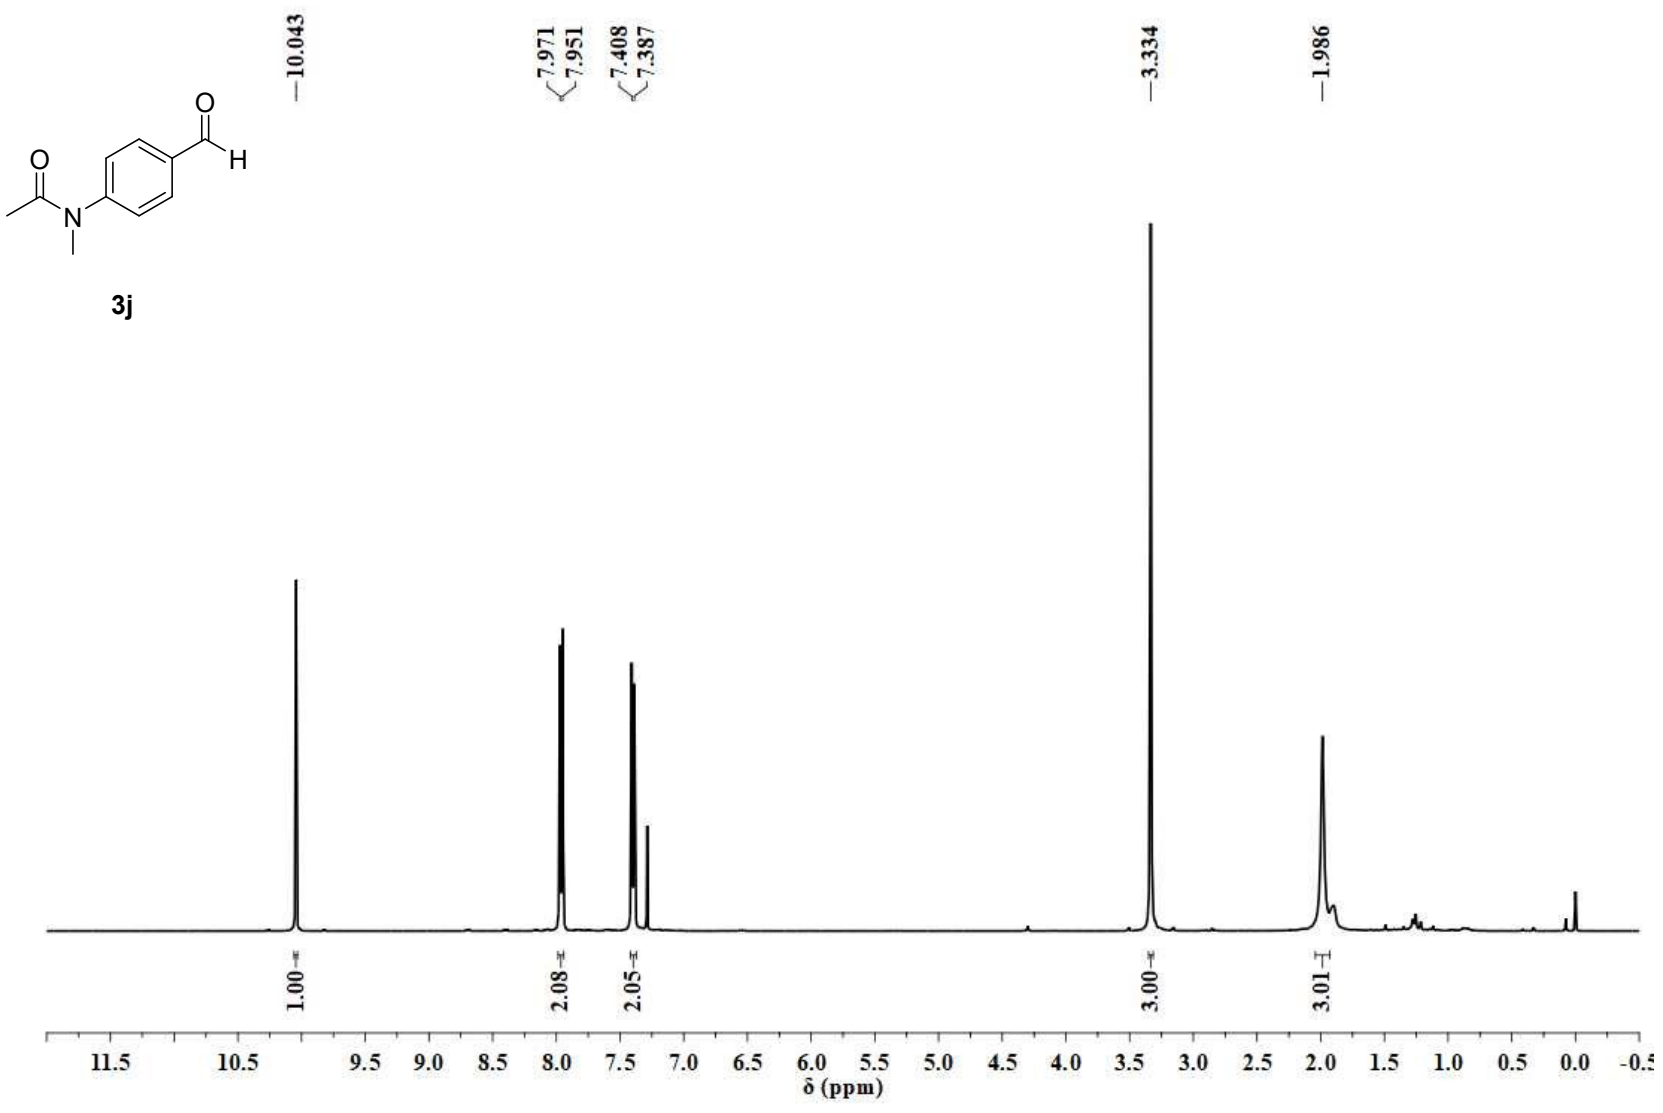

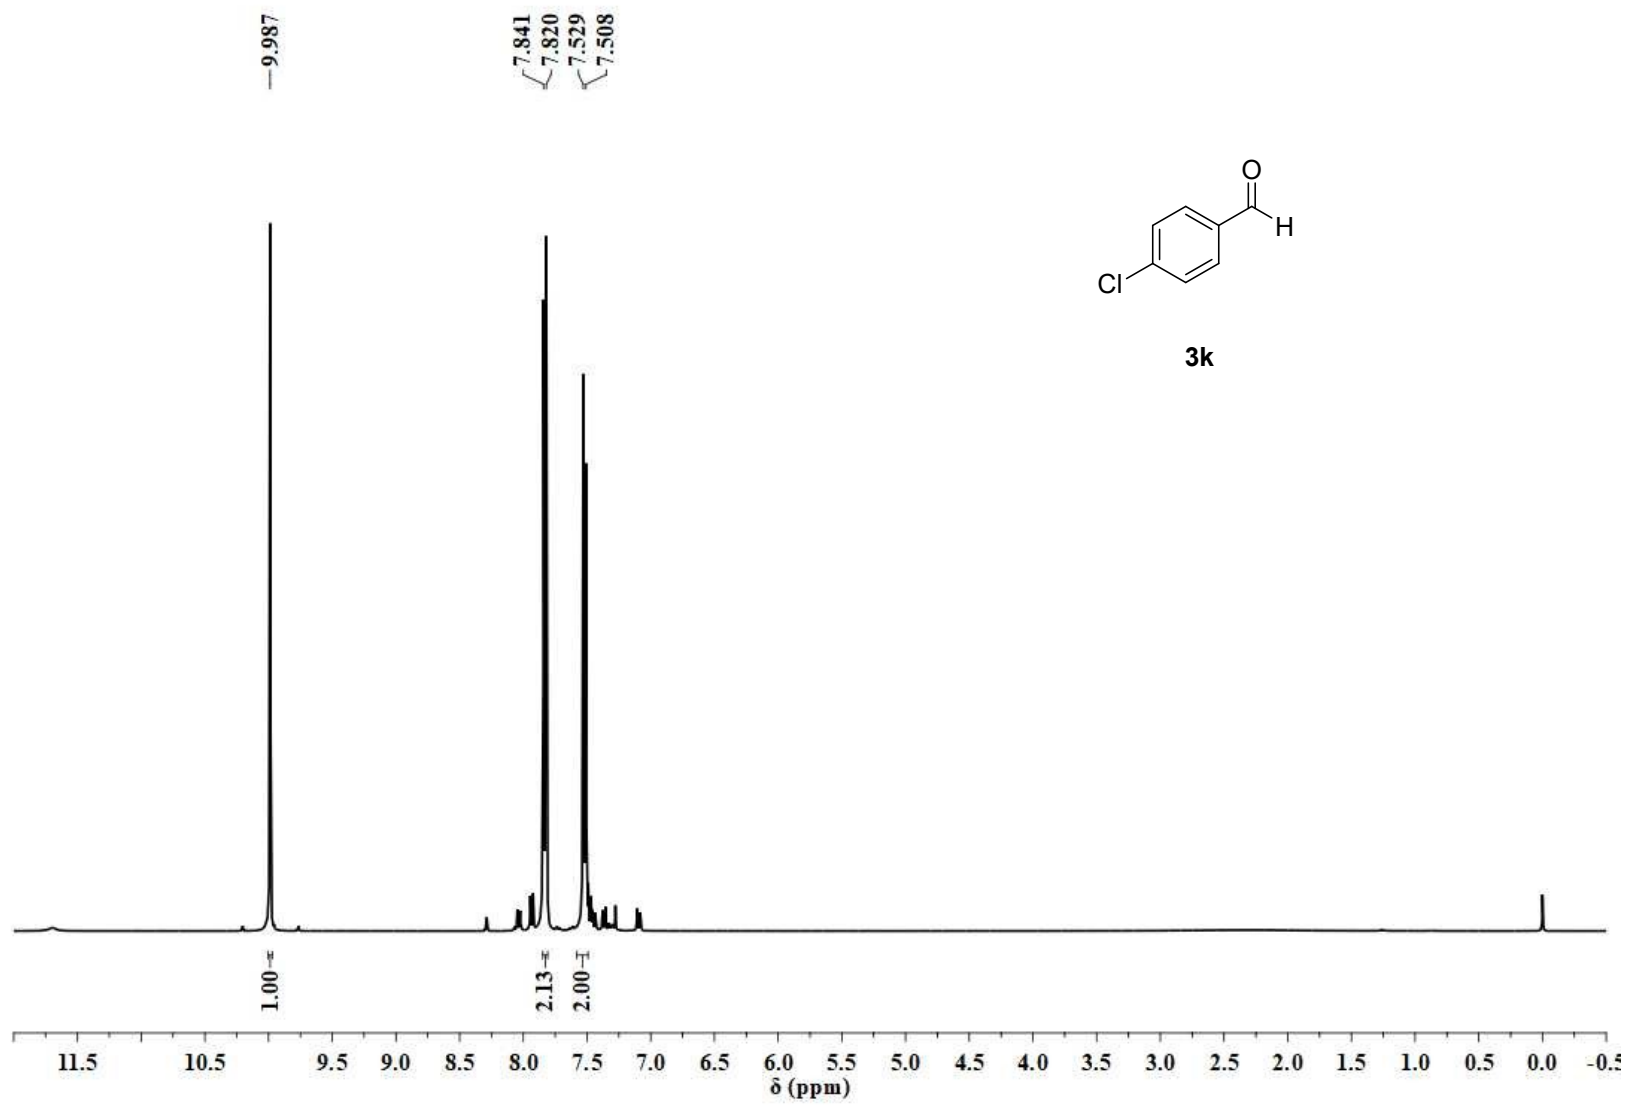

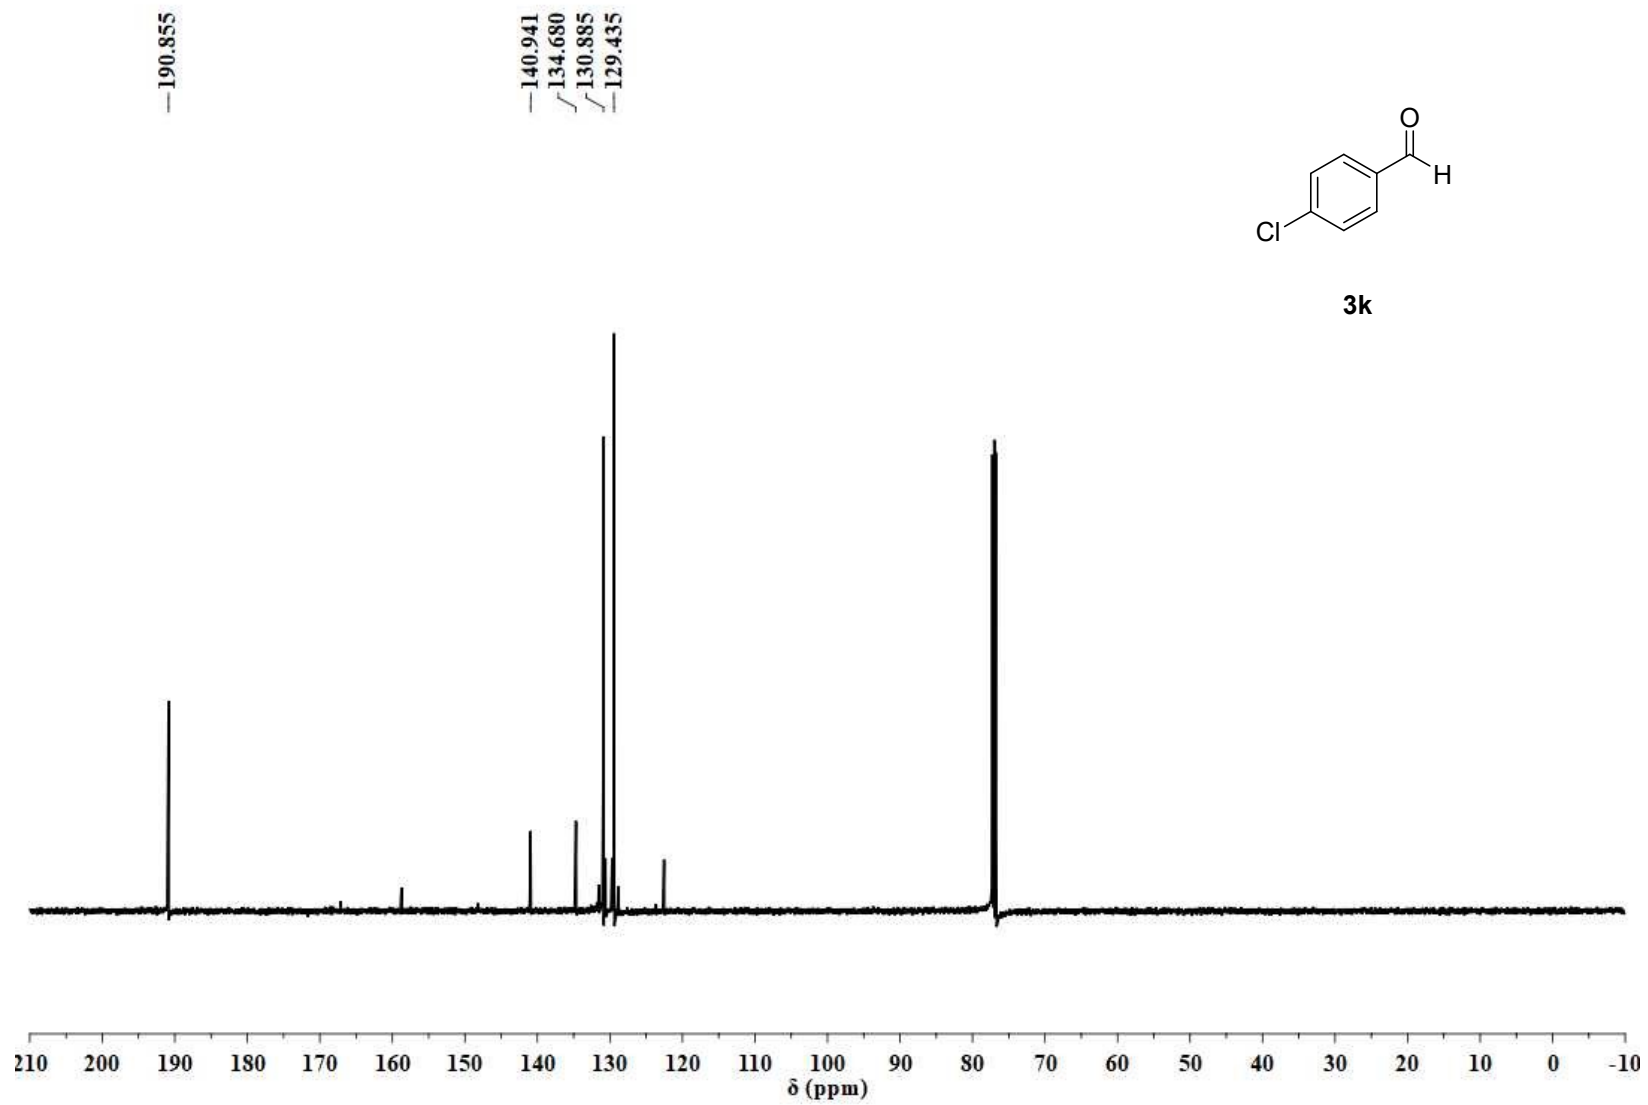

S36

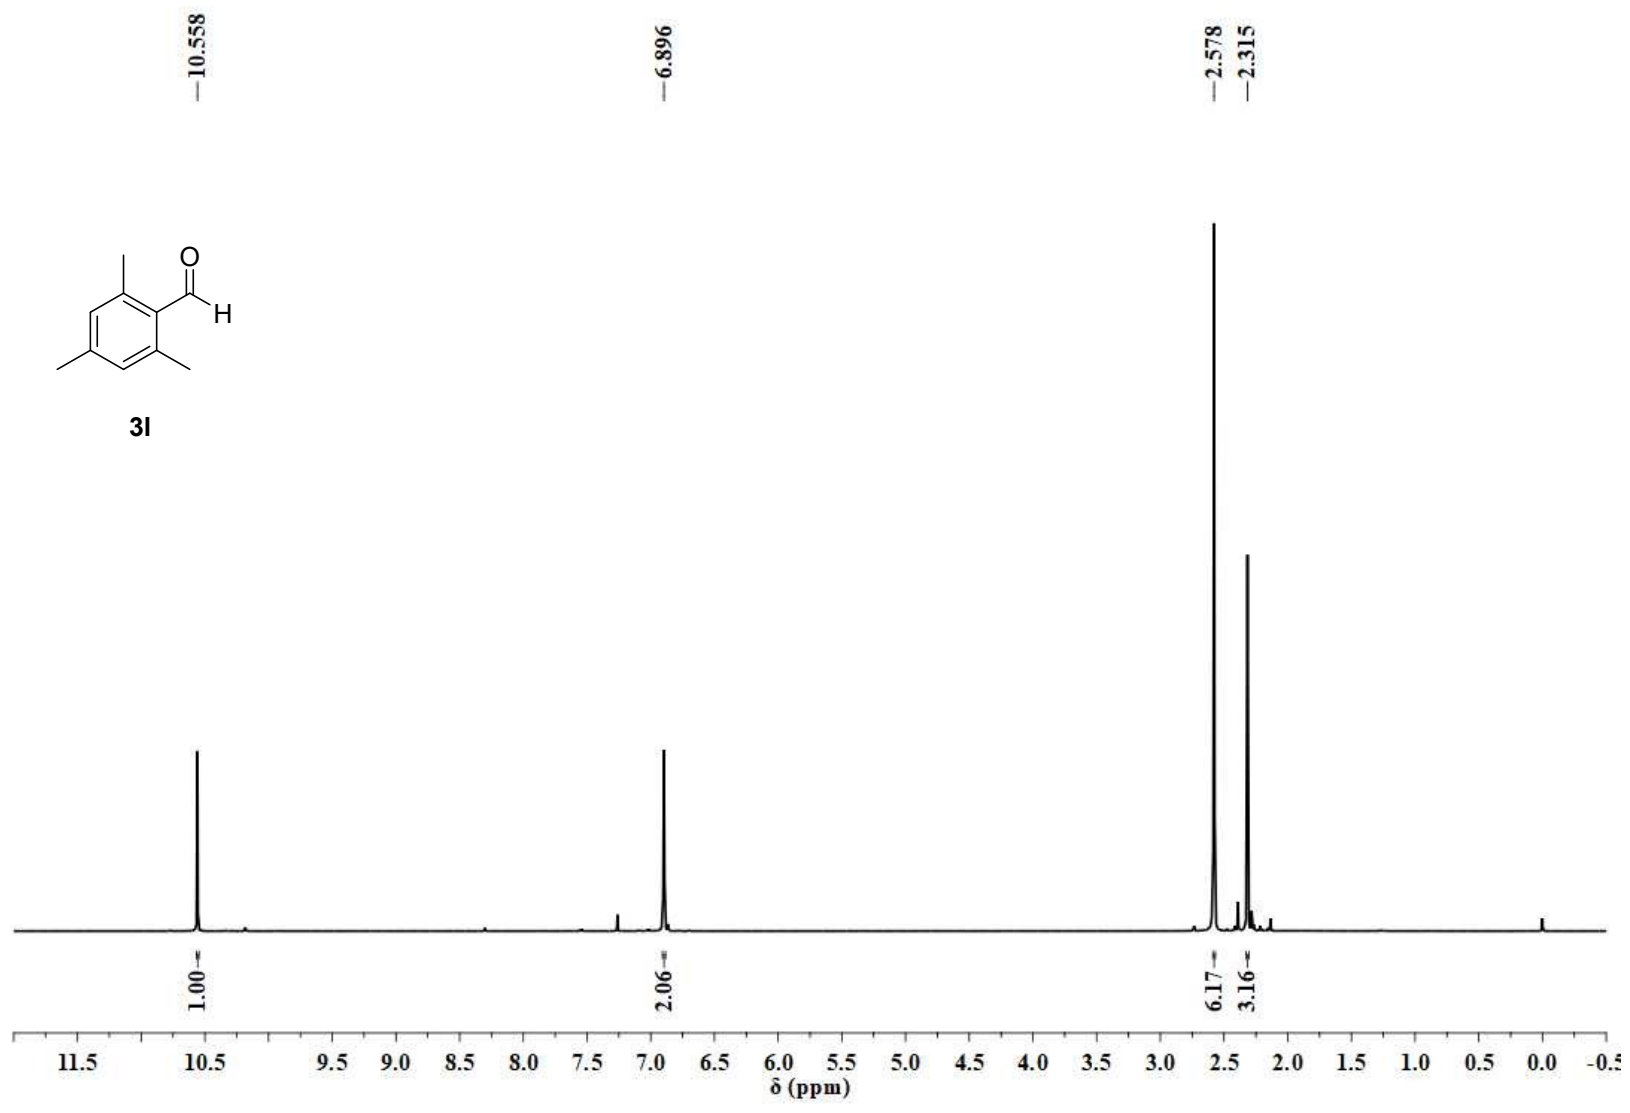

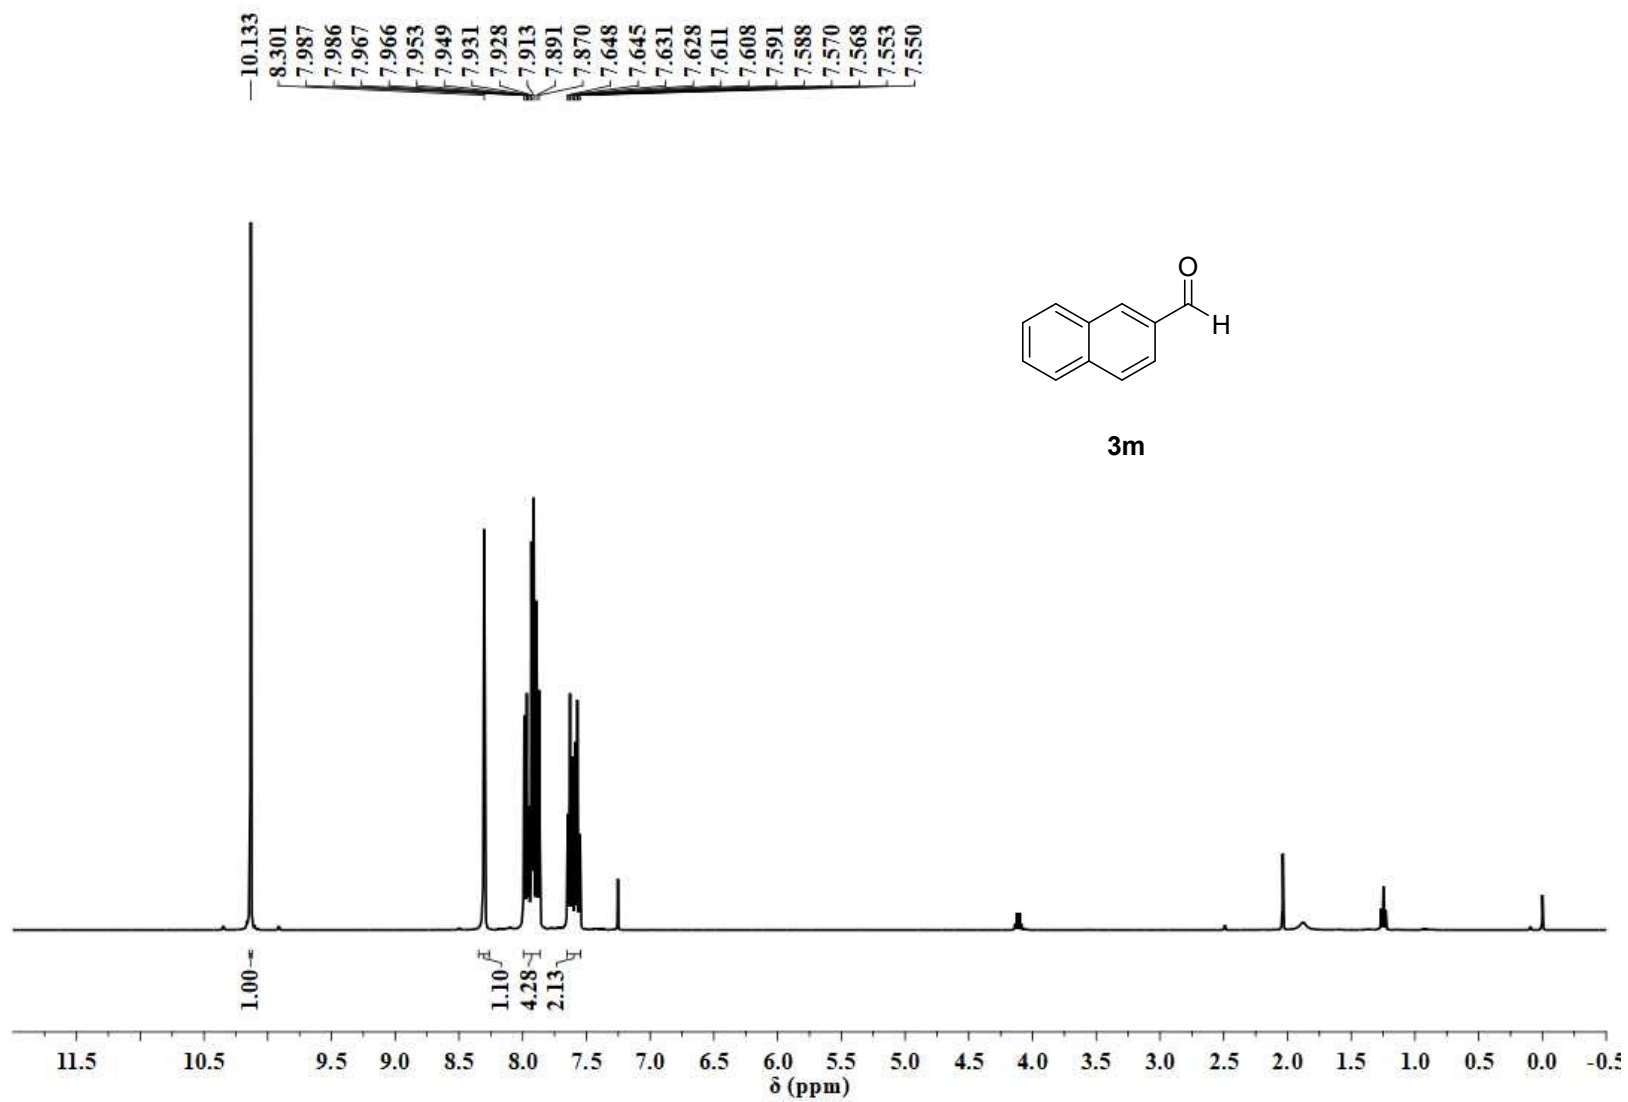

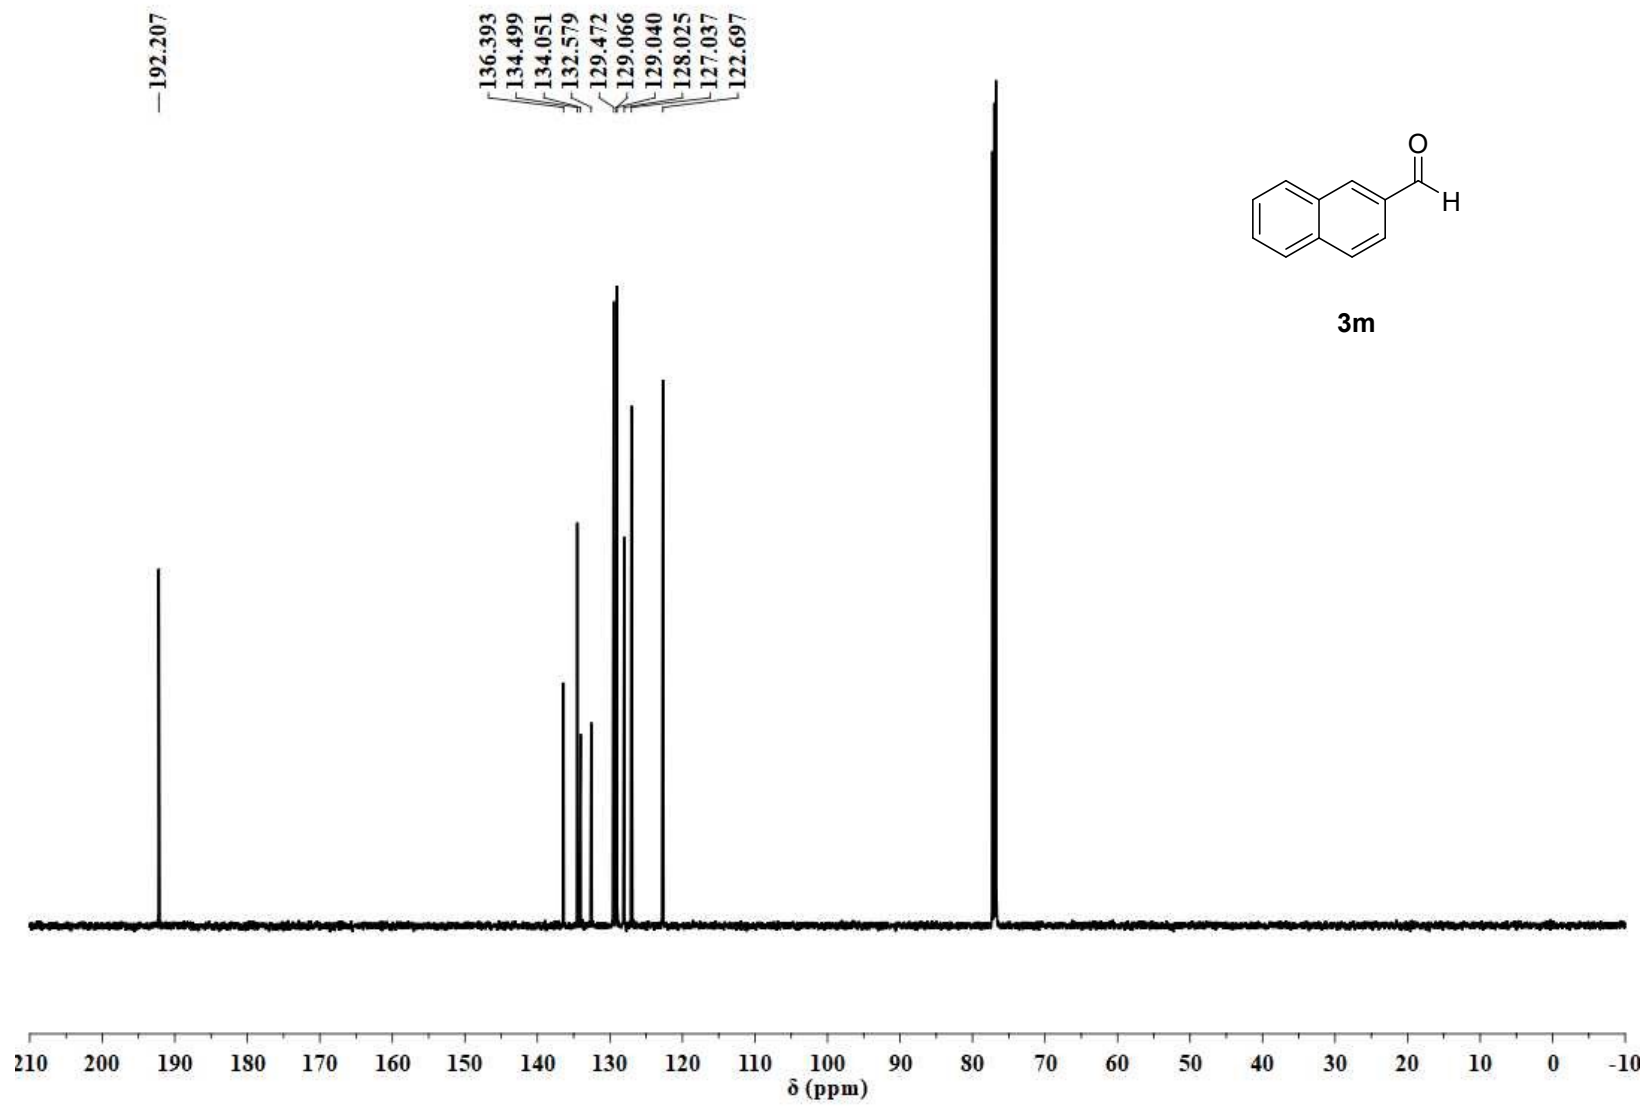

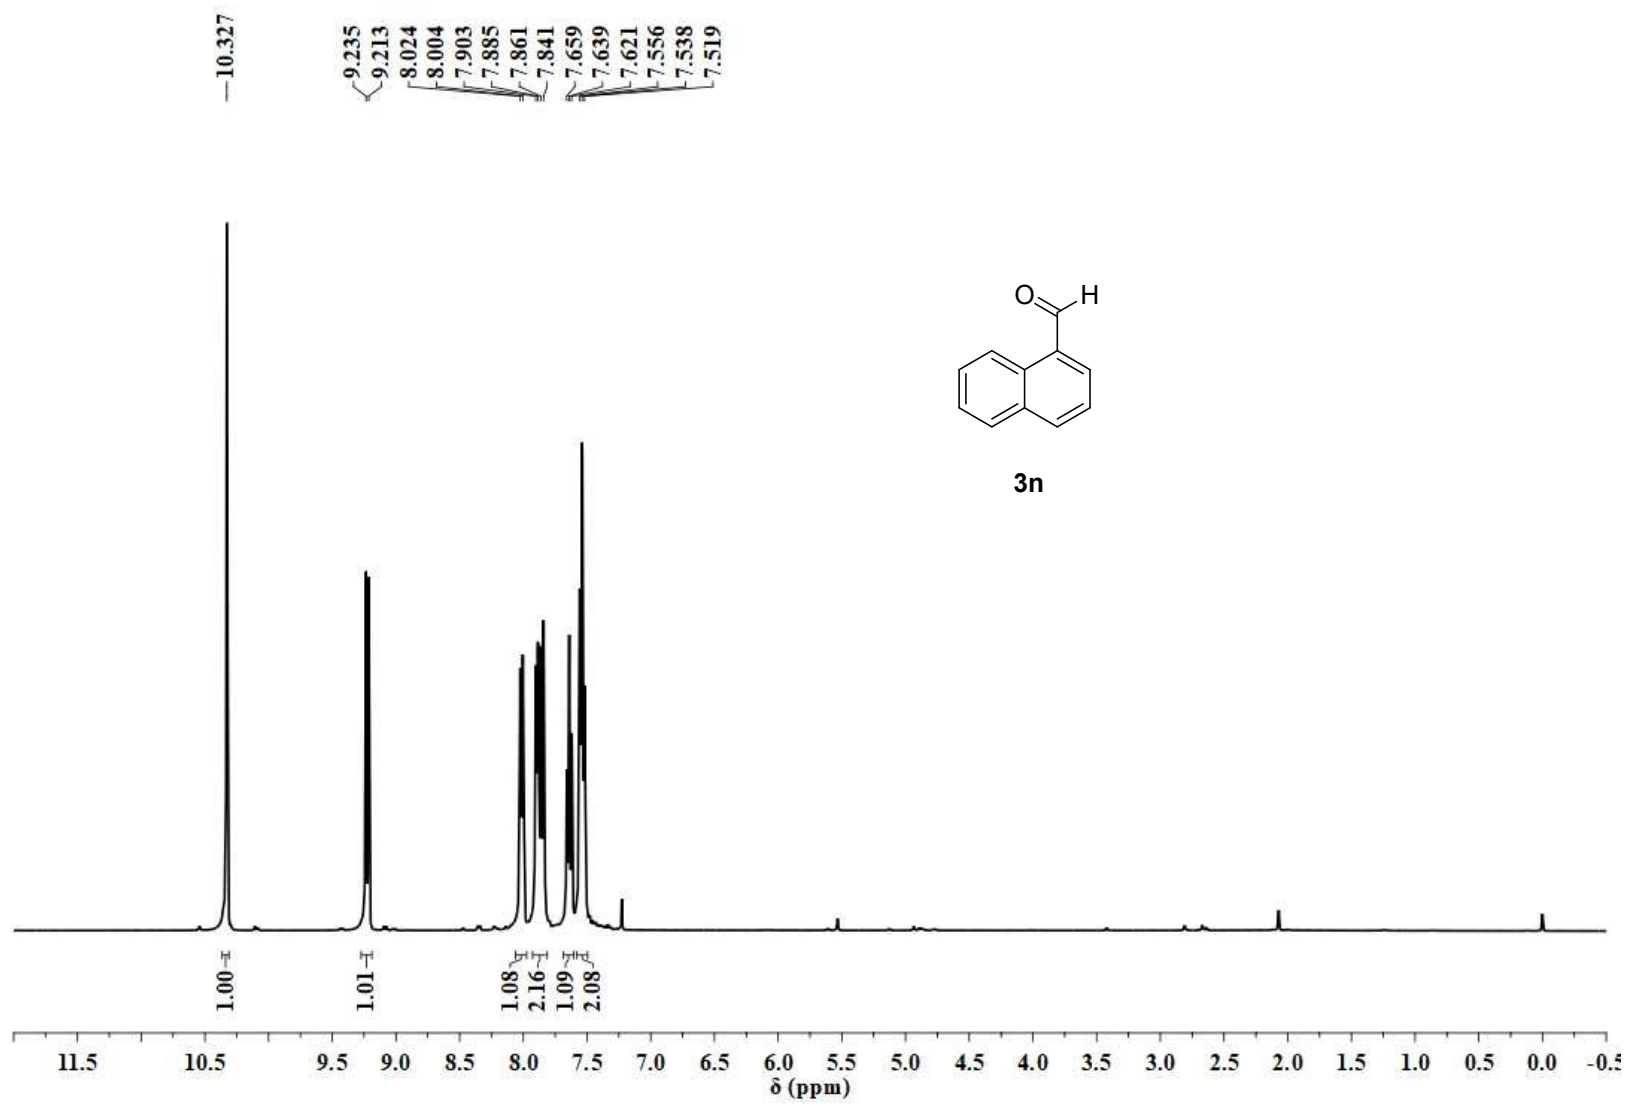



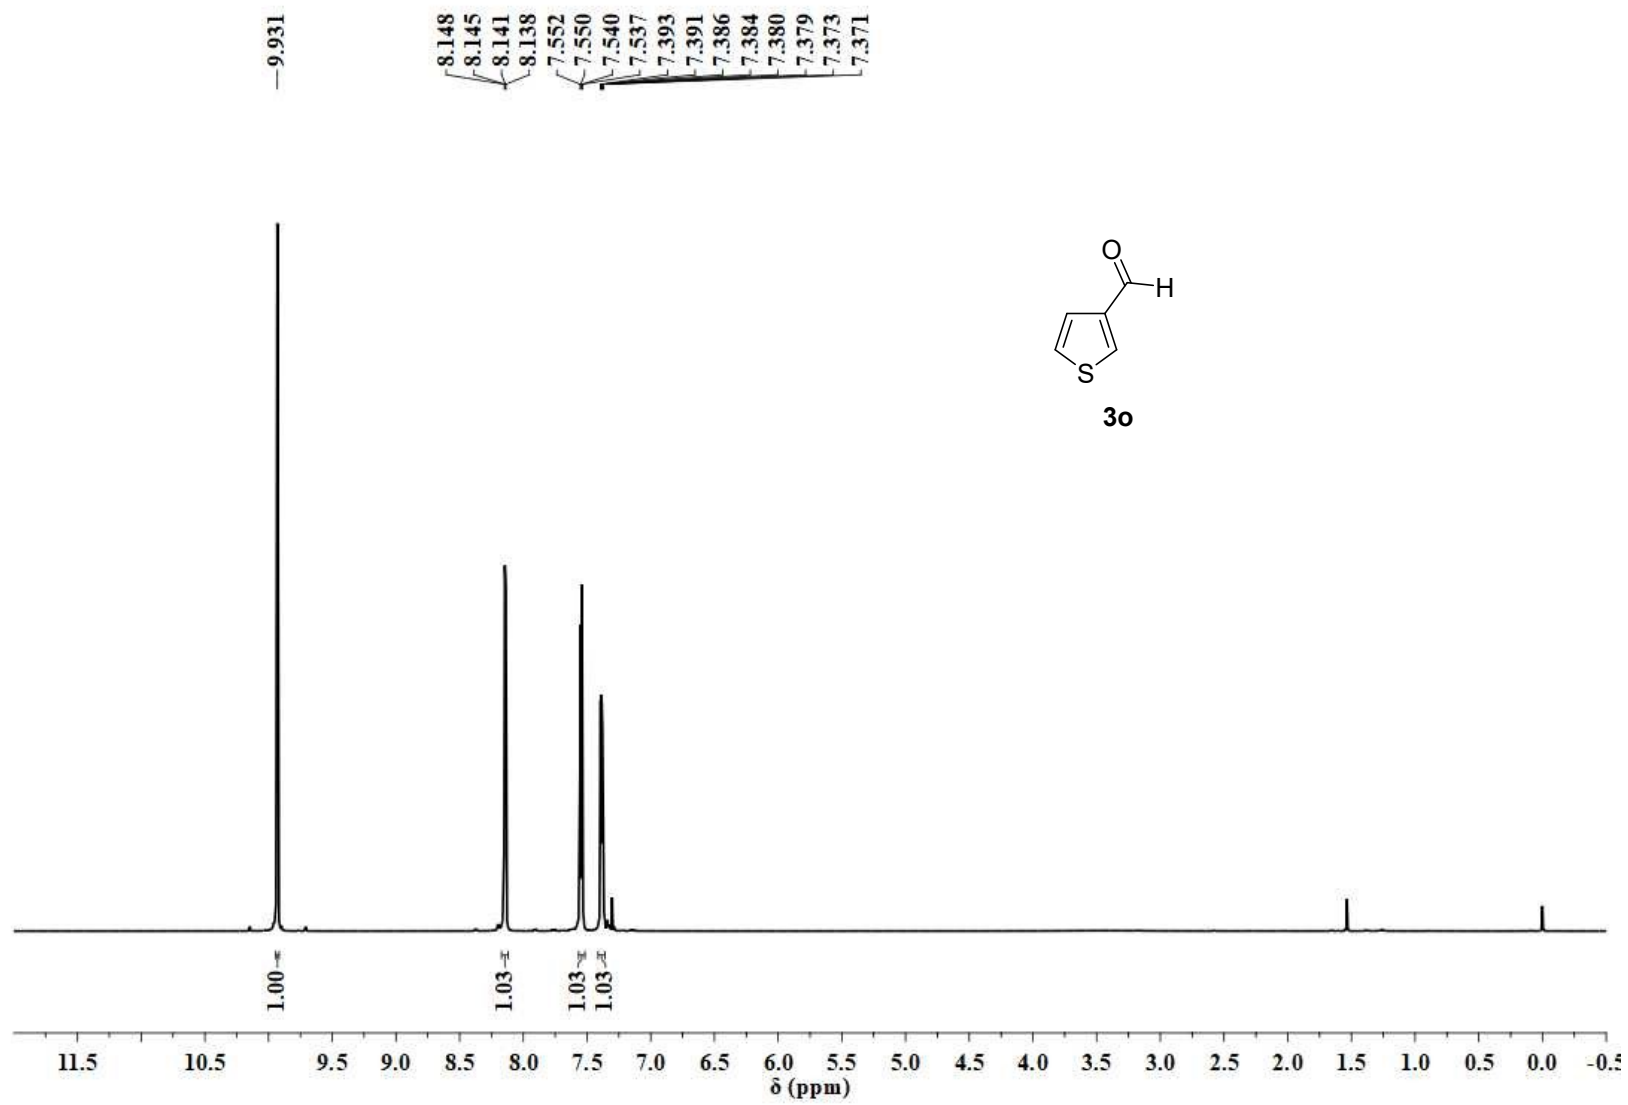

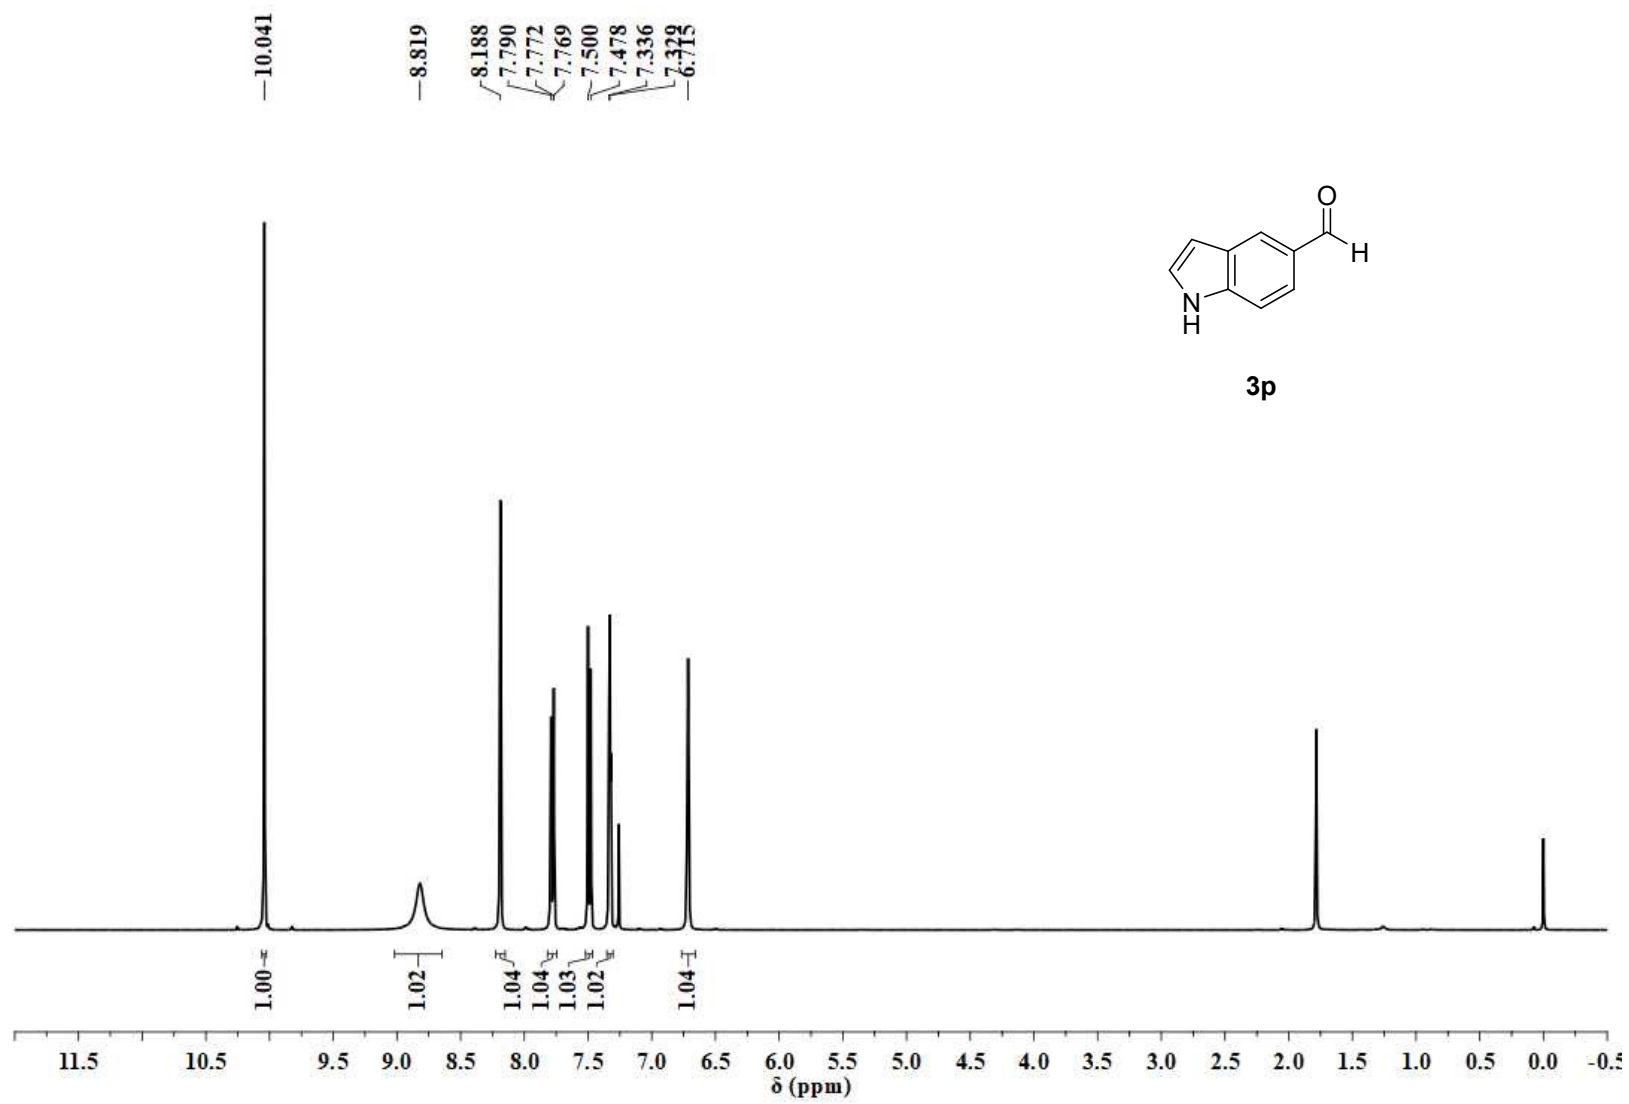

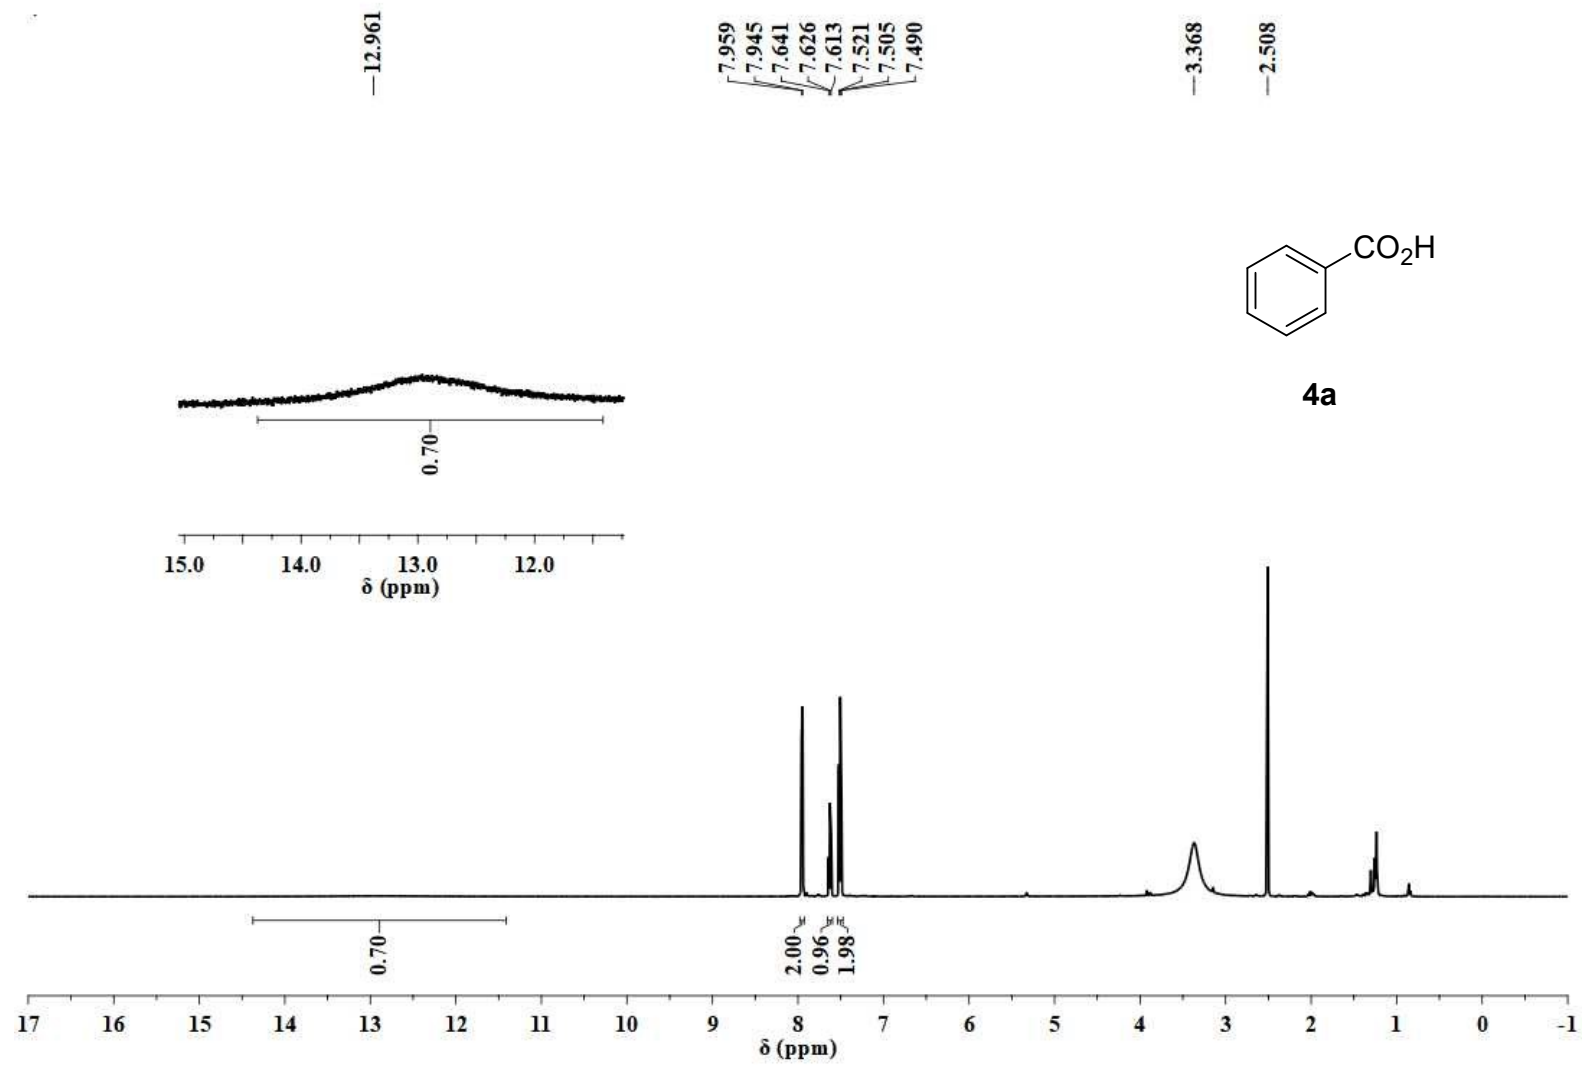

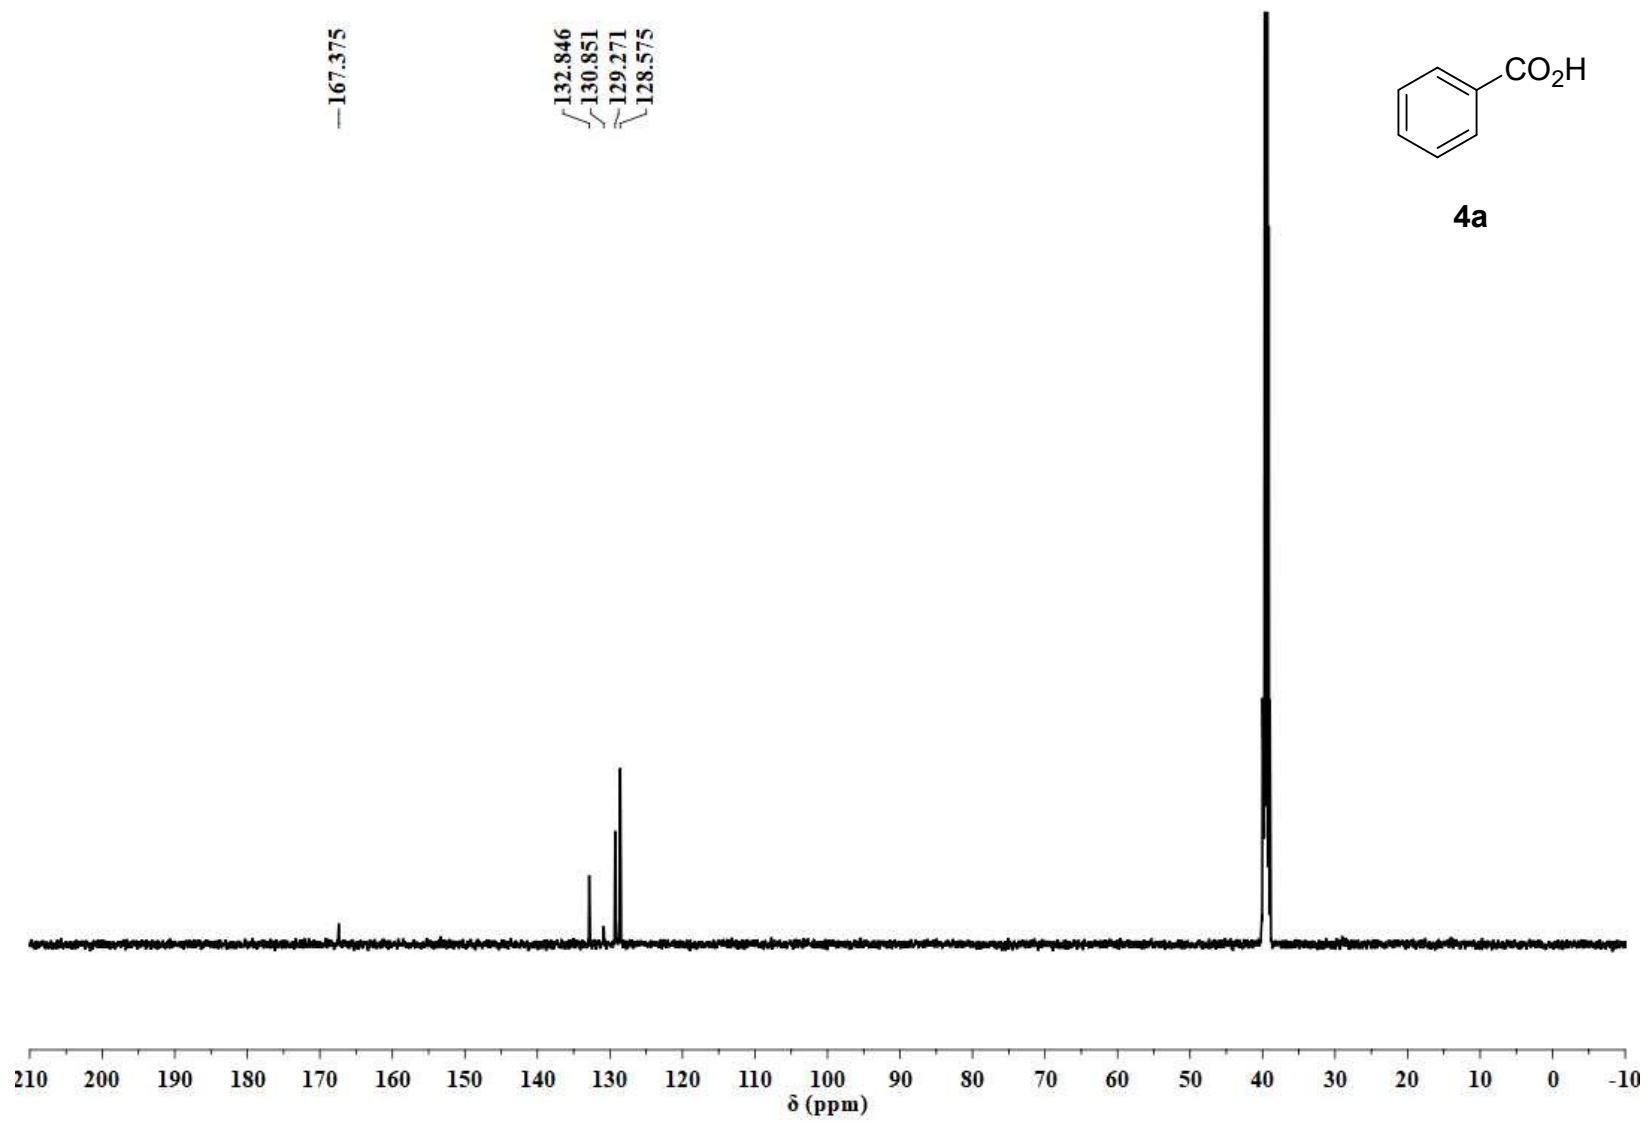

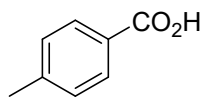

4b

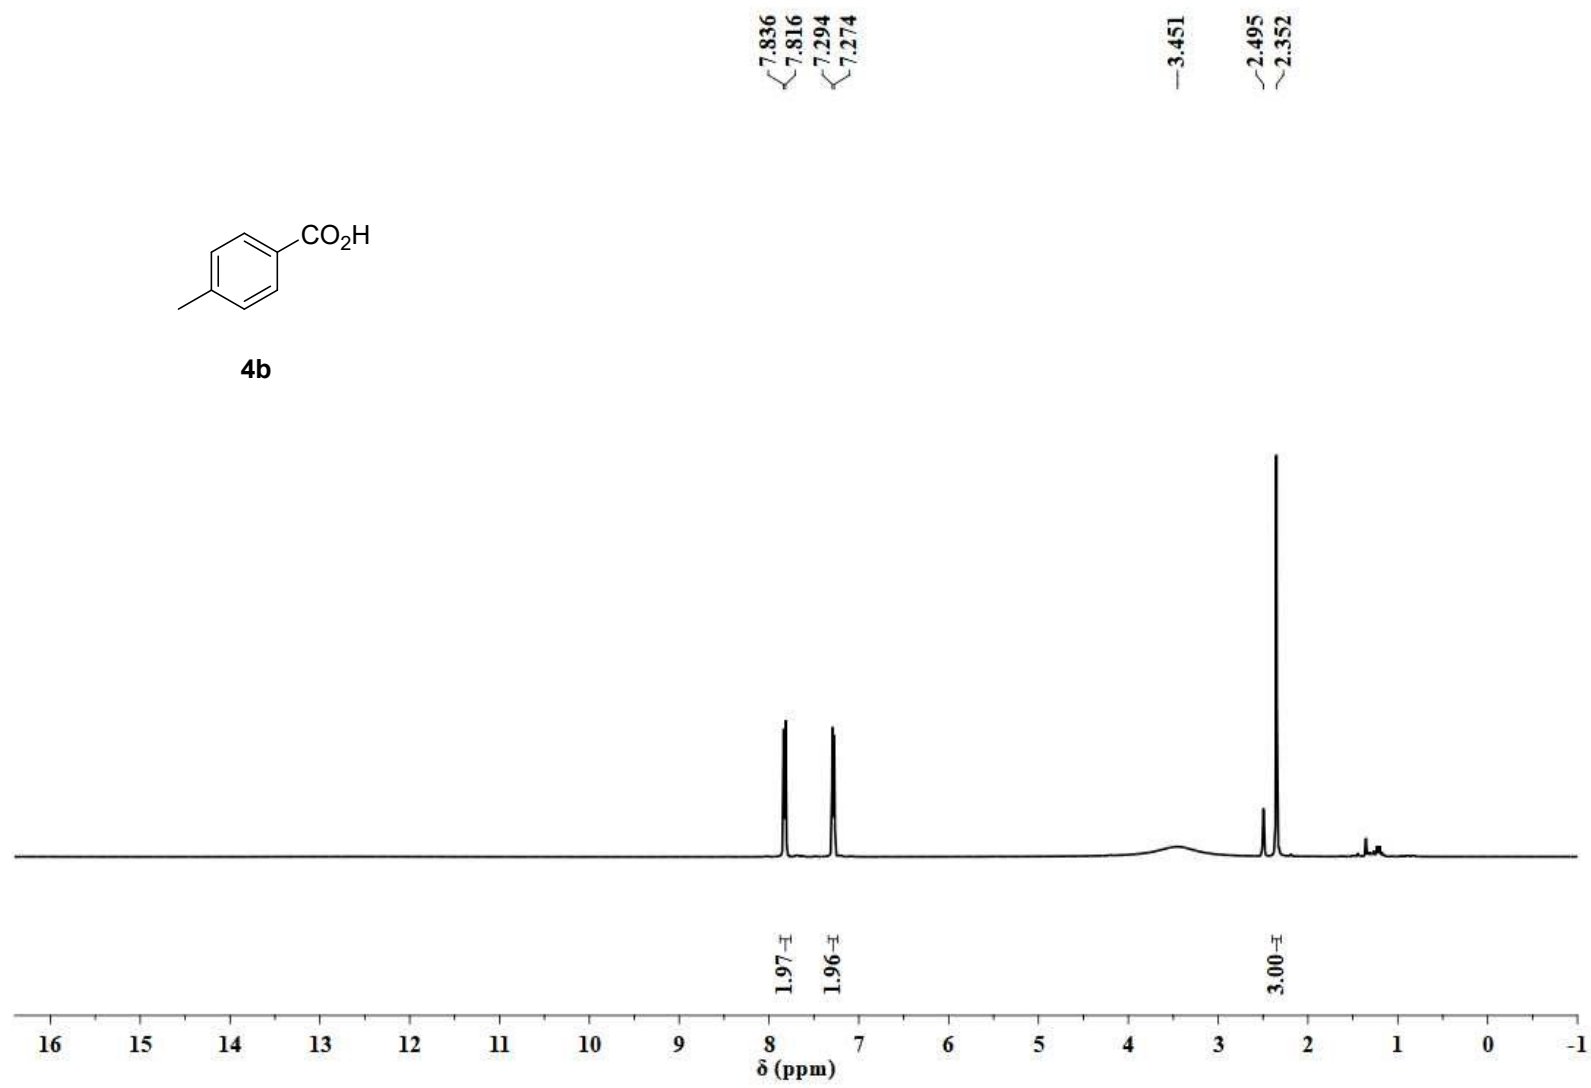

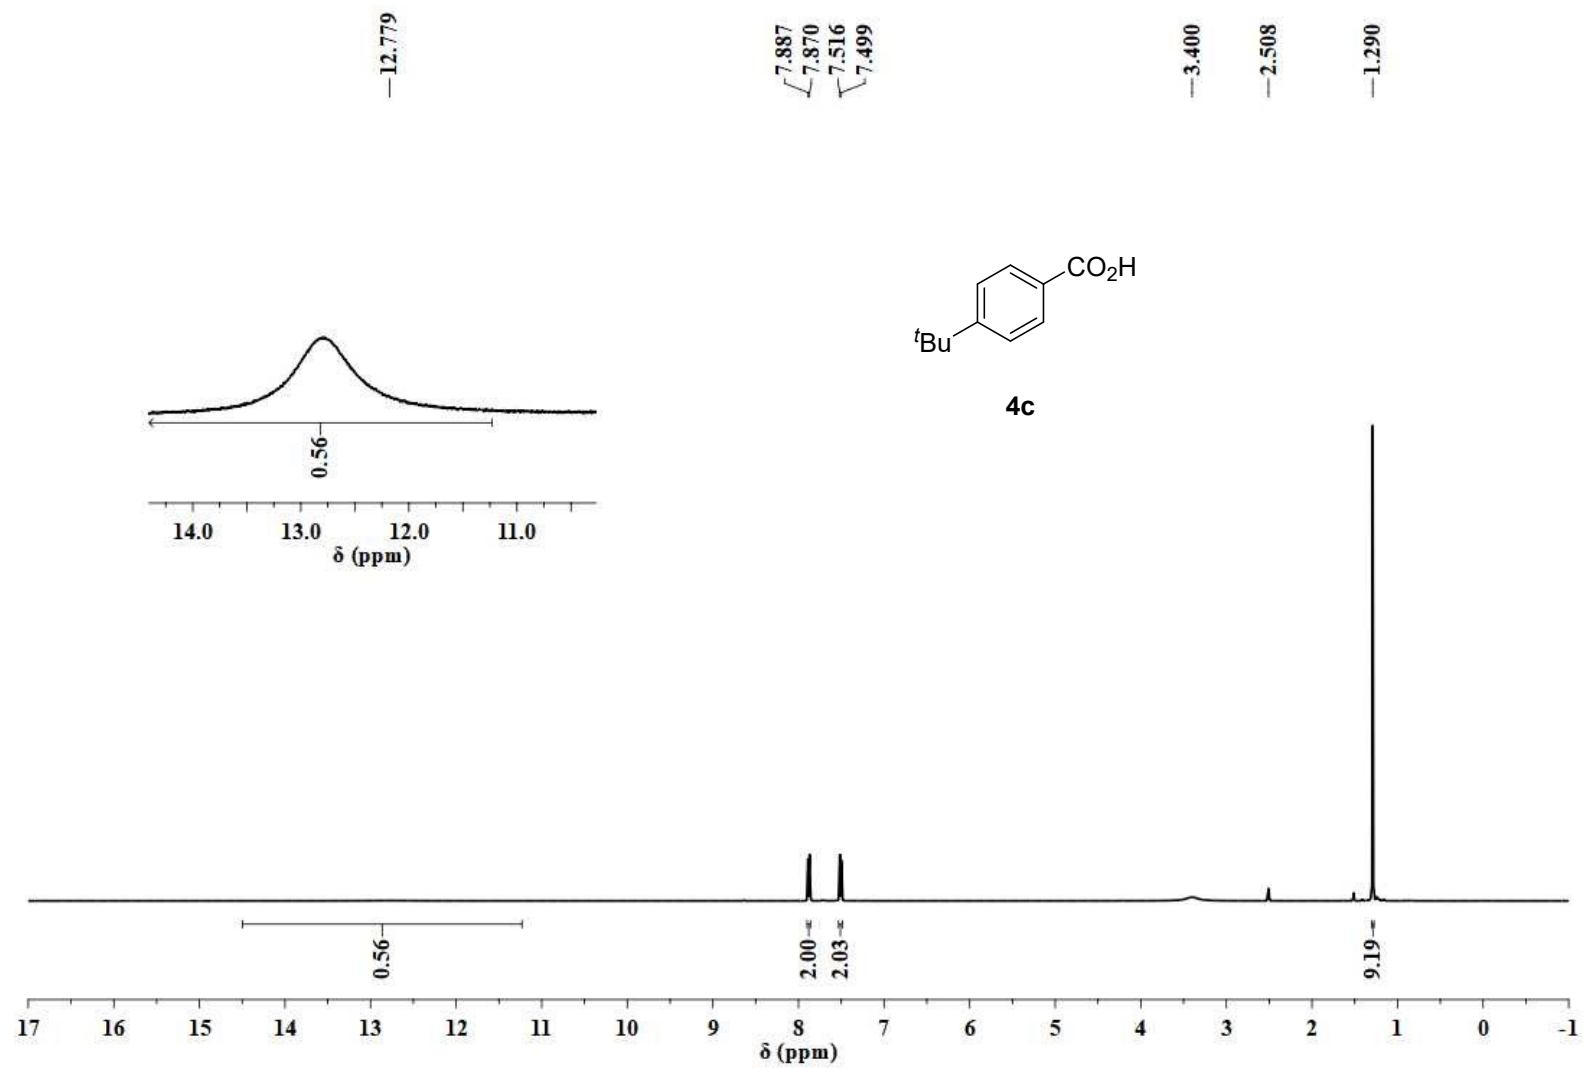

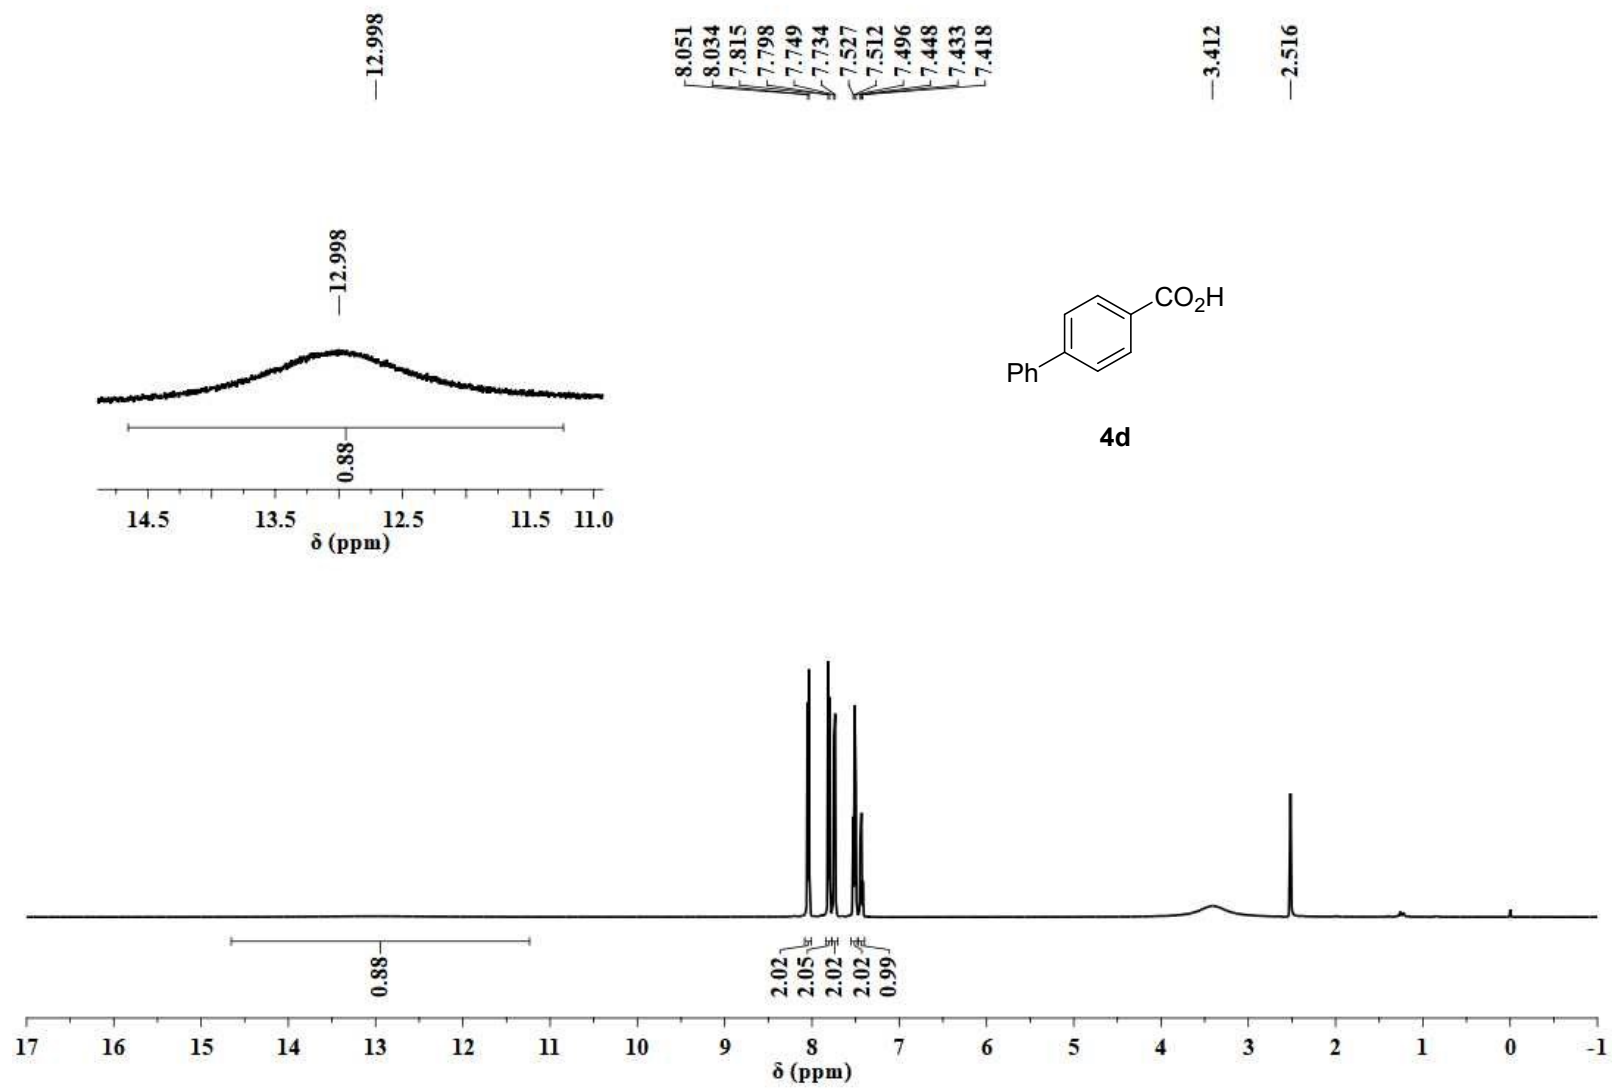

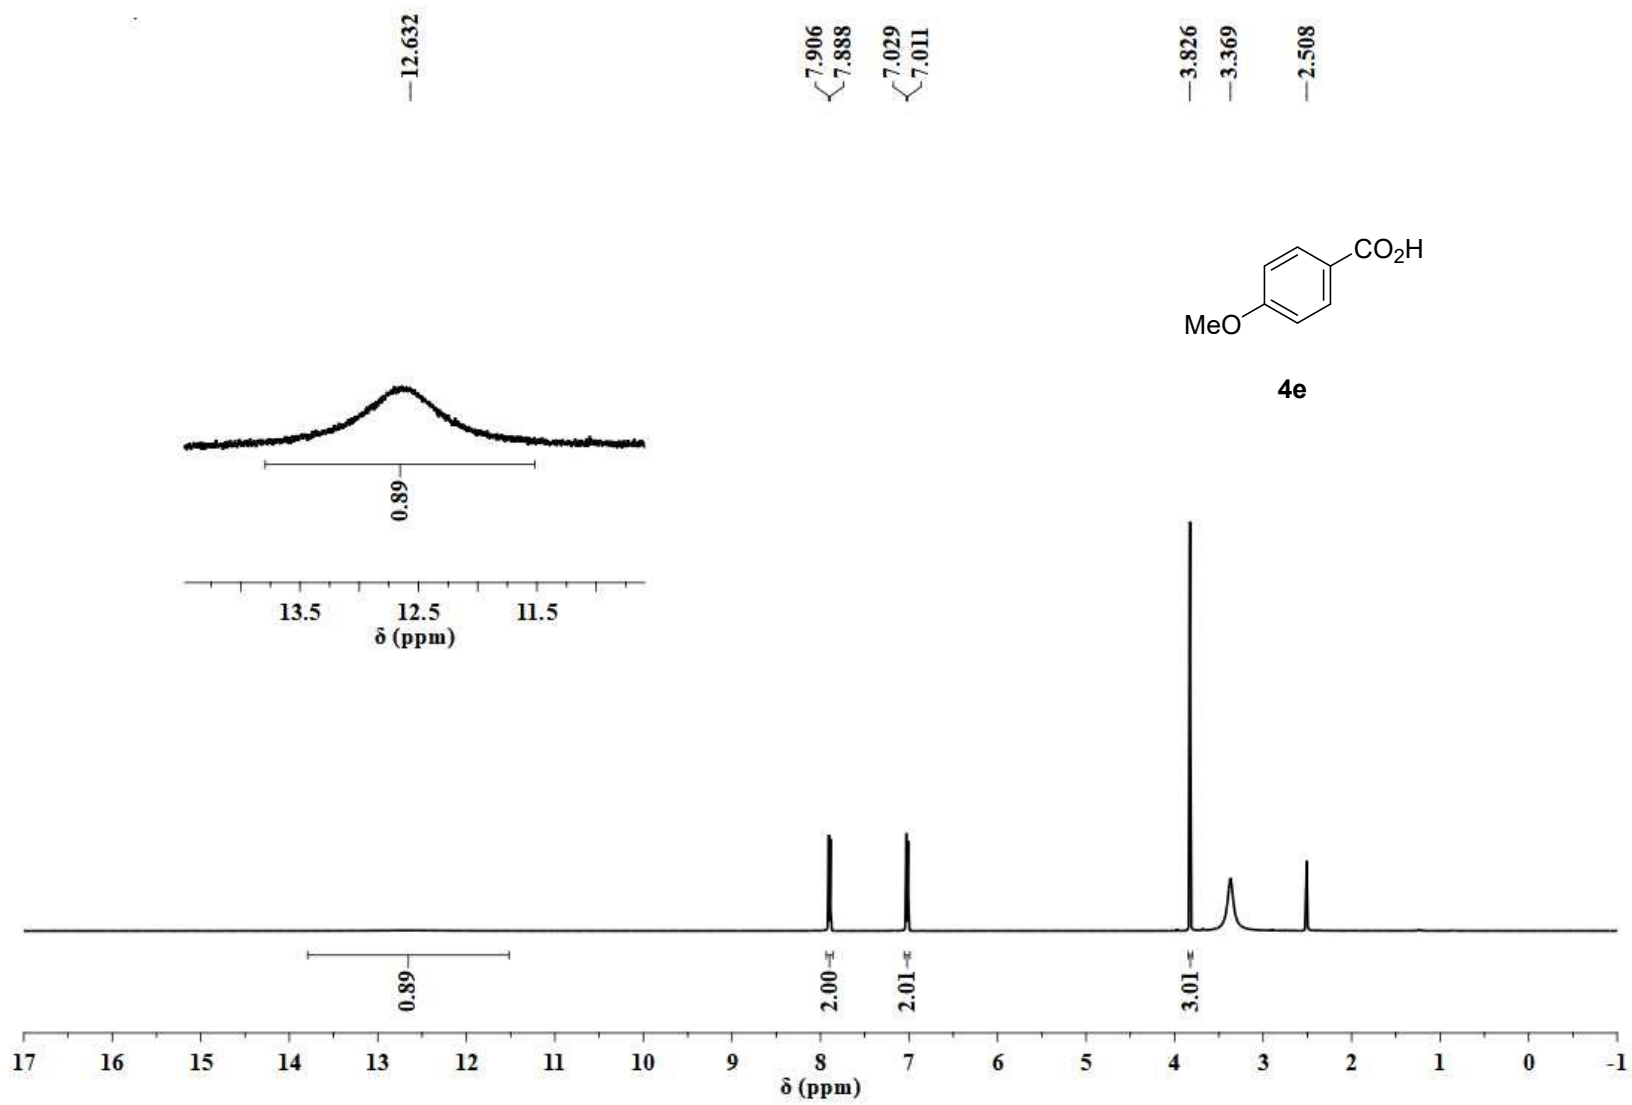



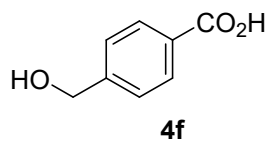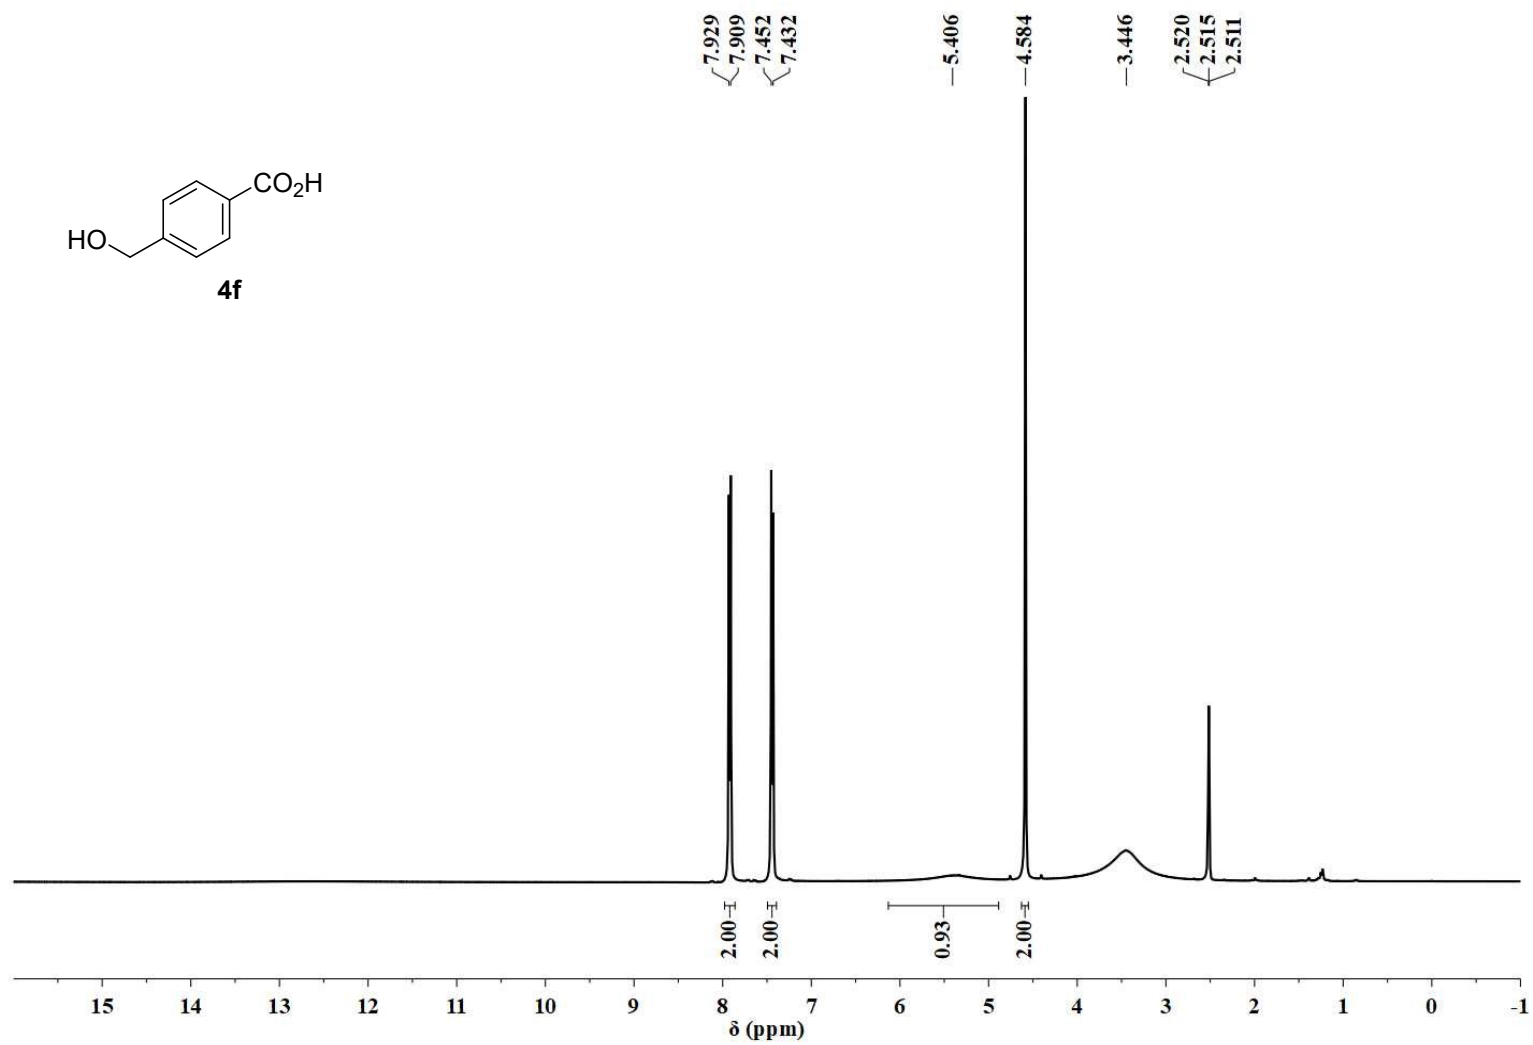

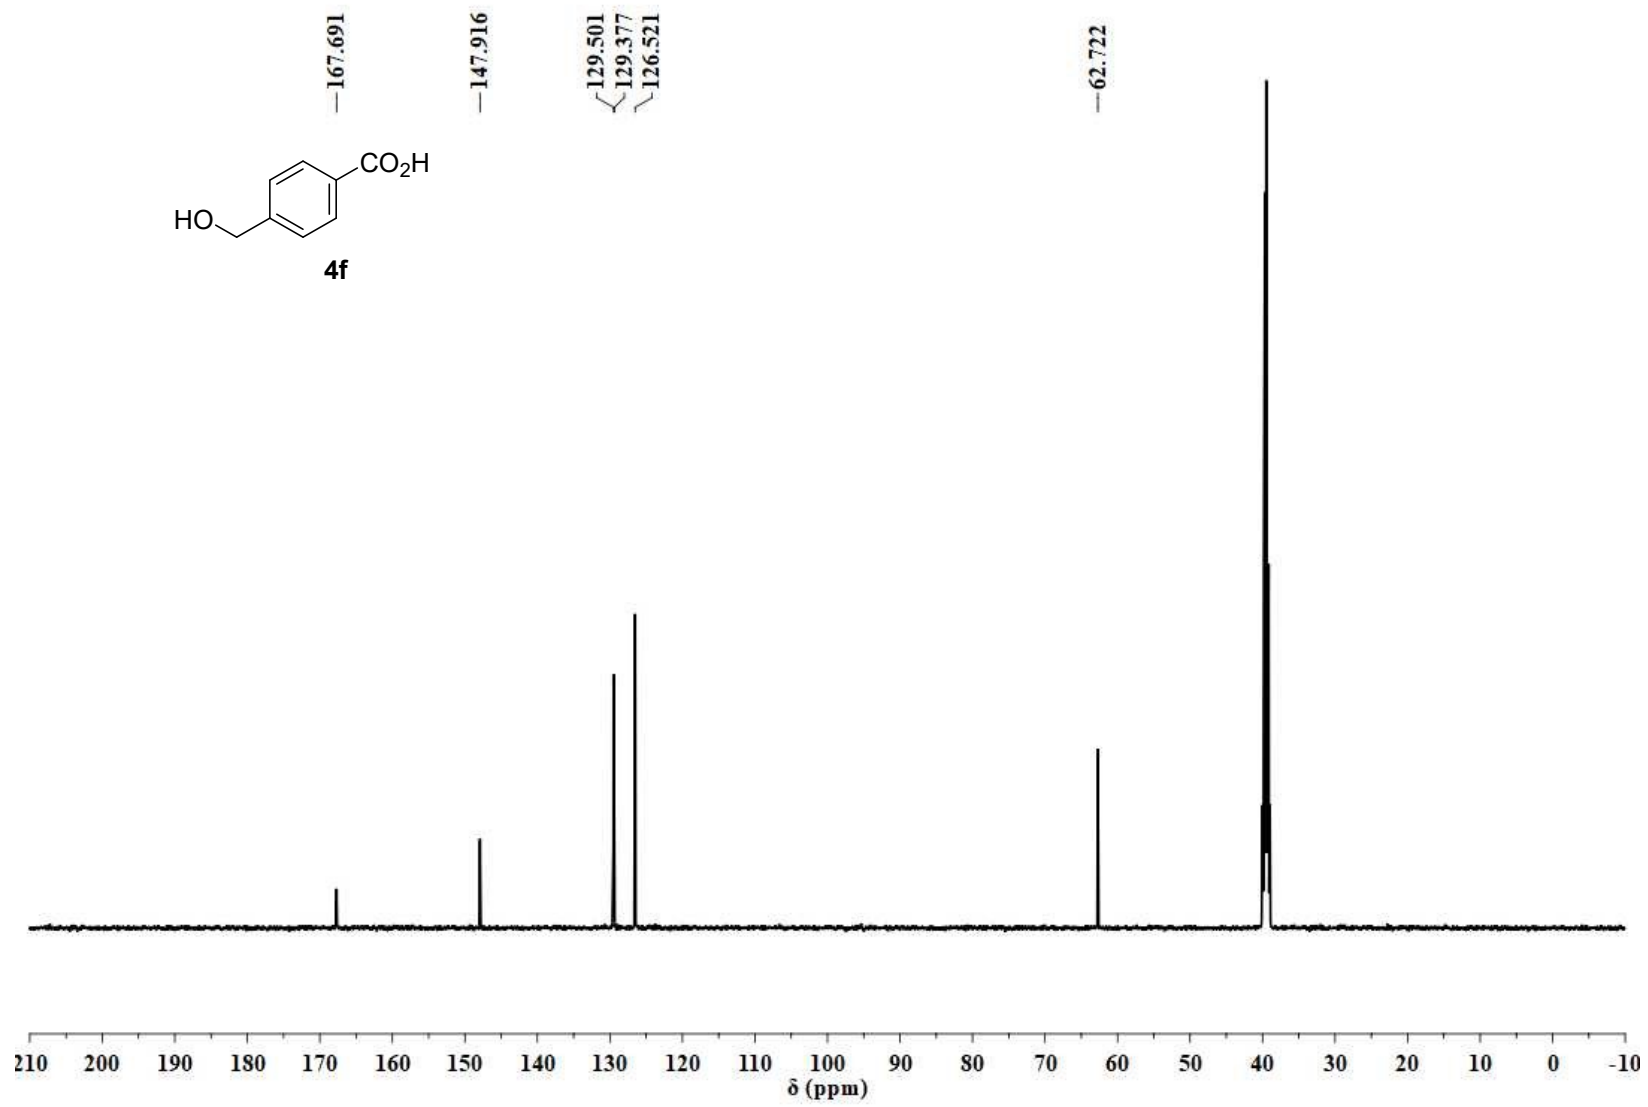

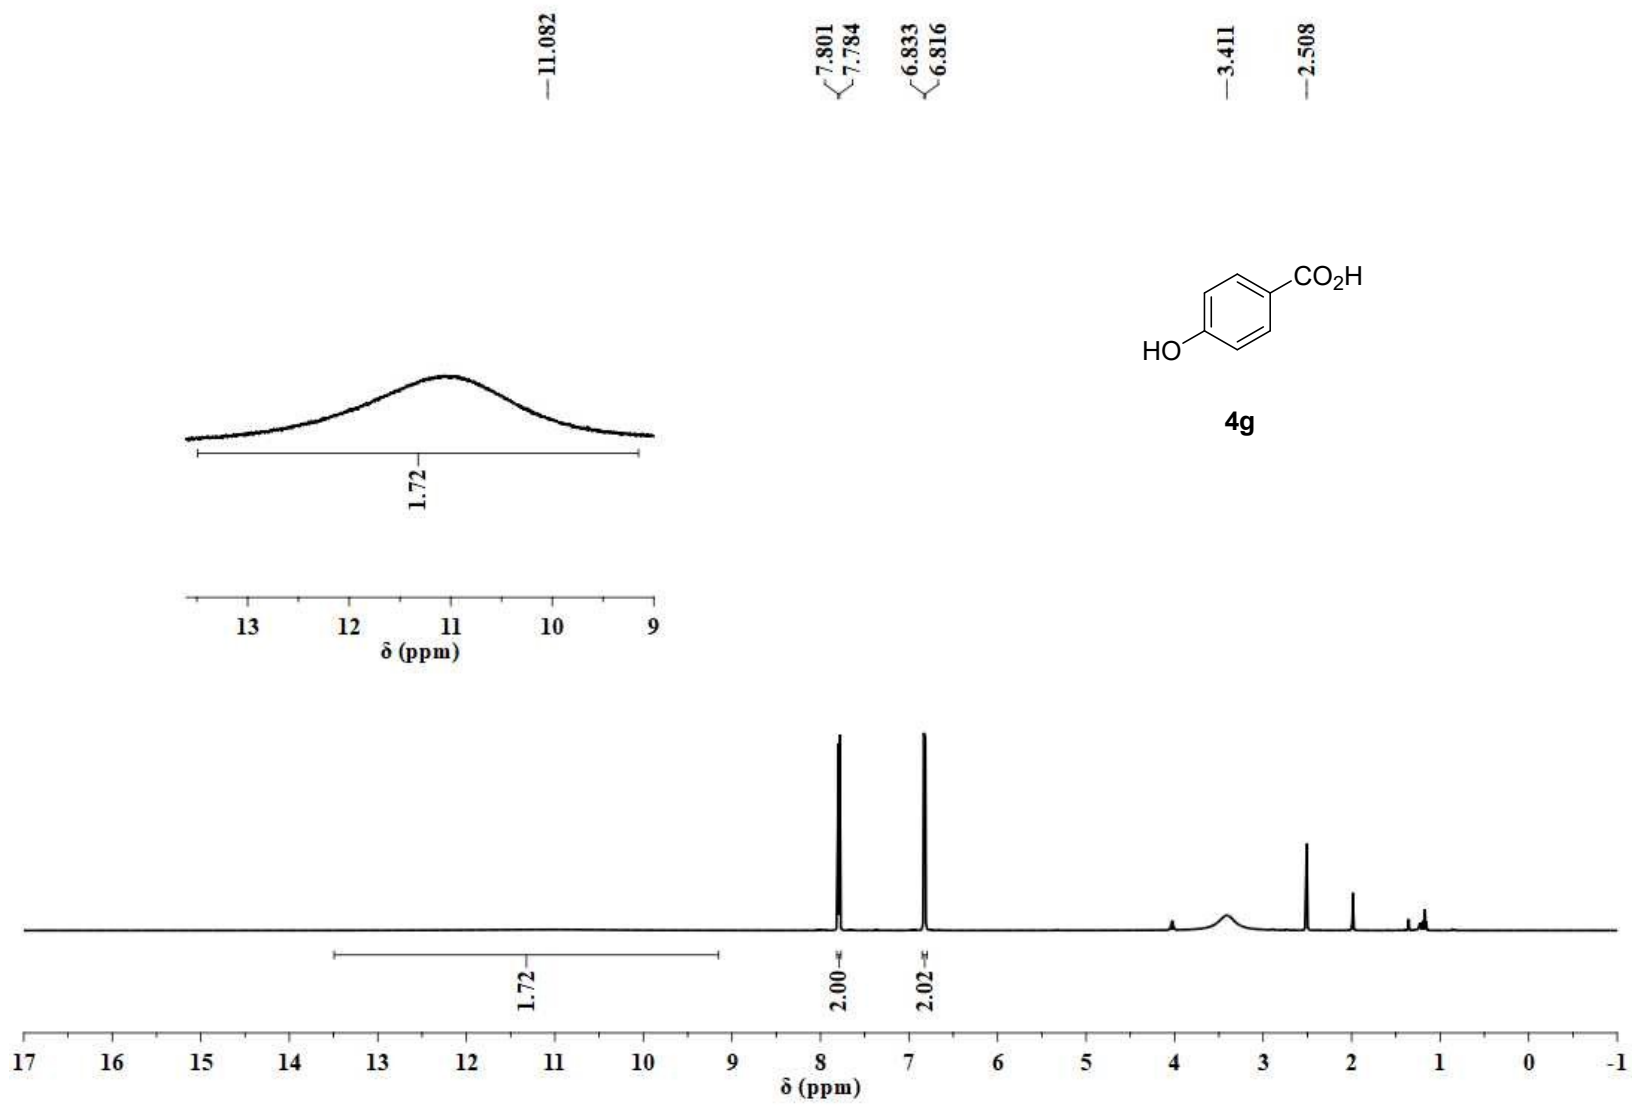

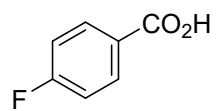

4h

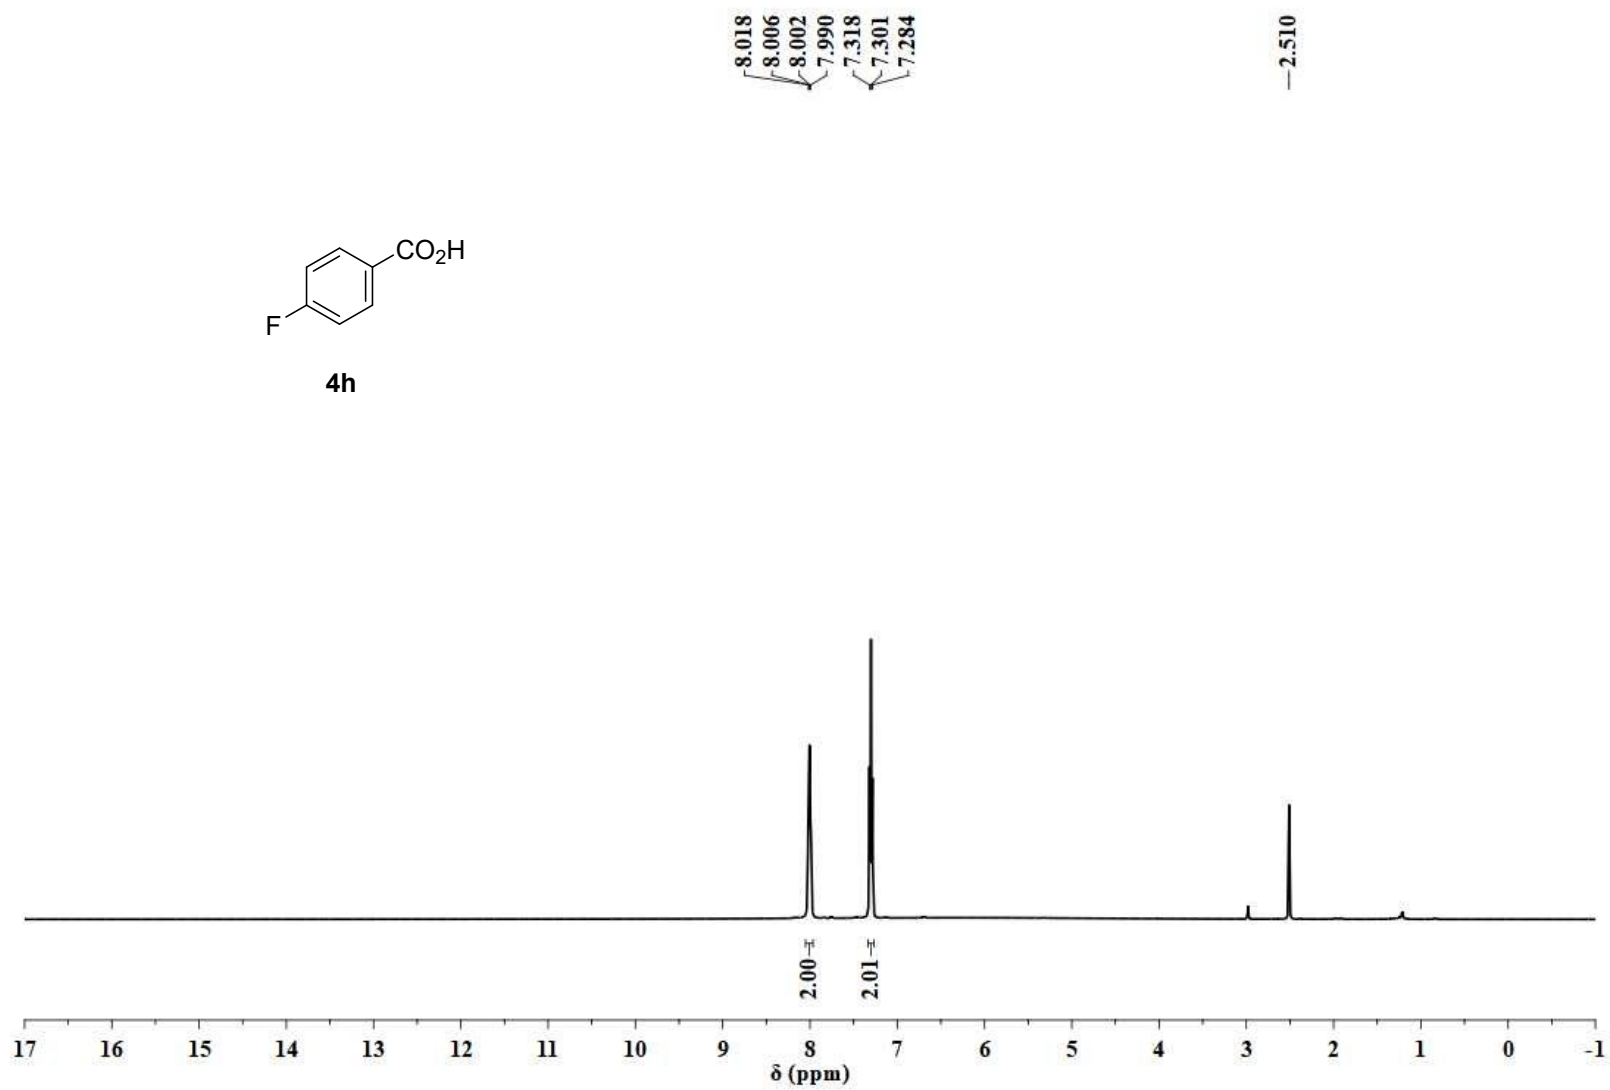

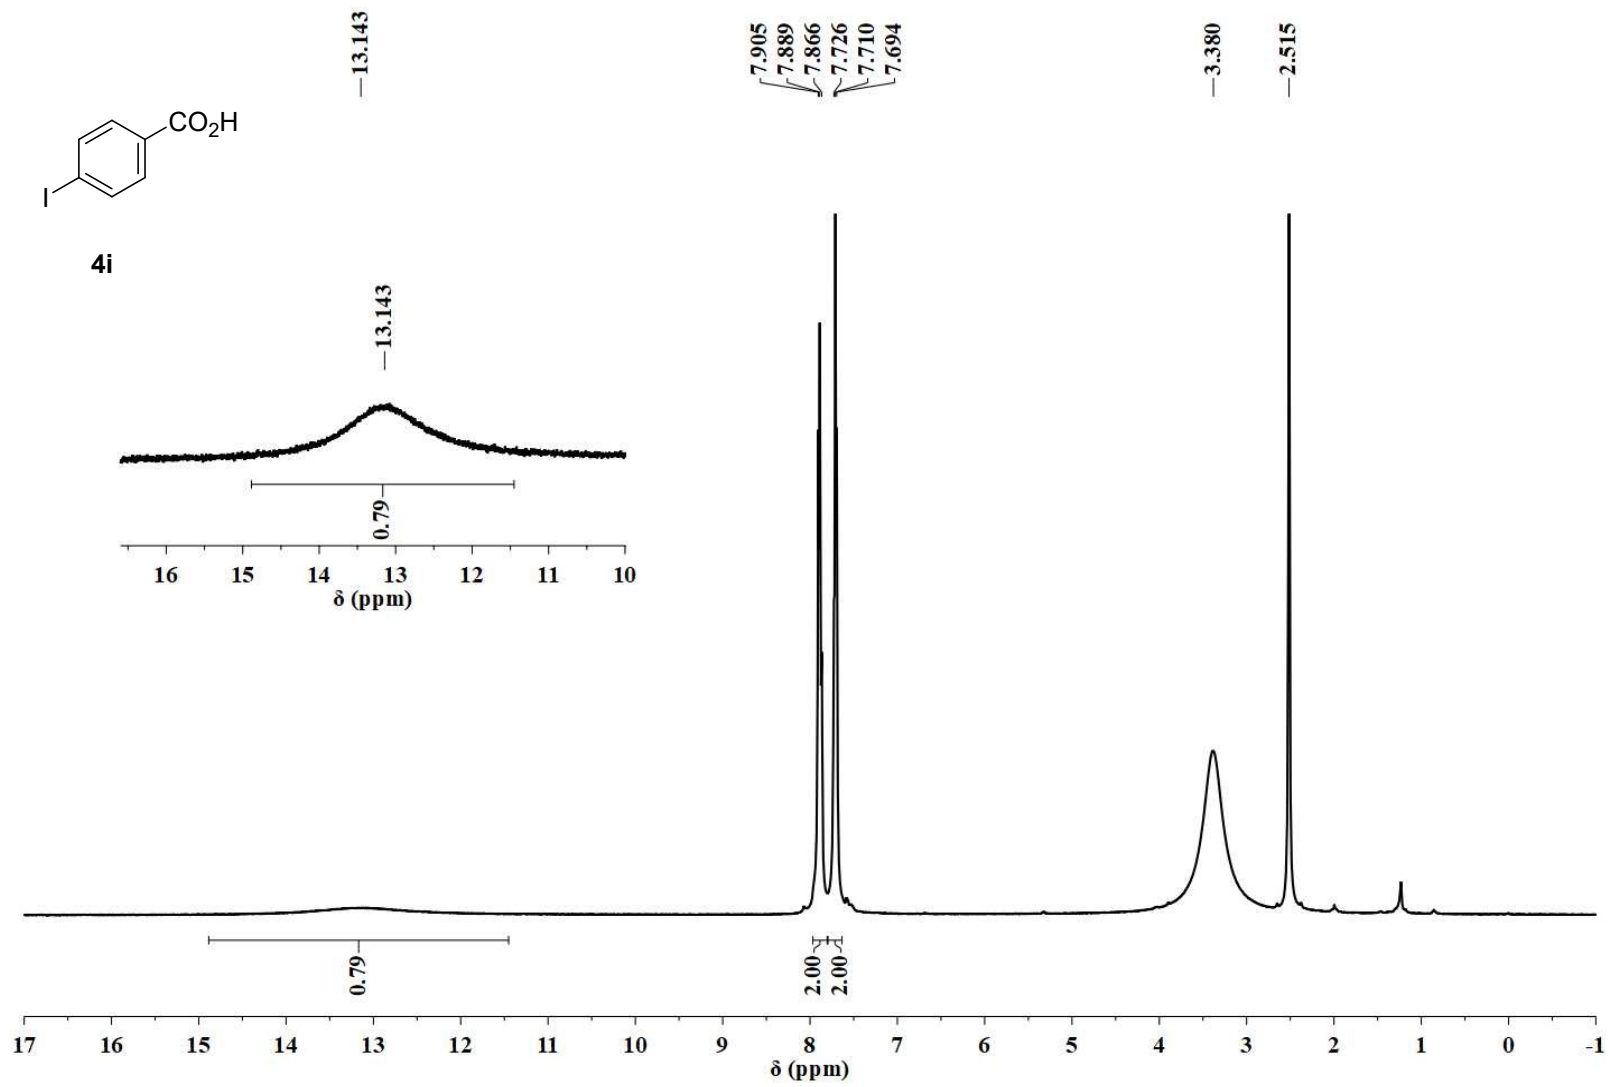

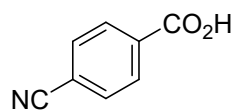

4j

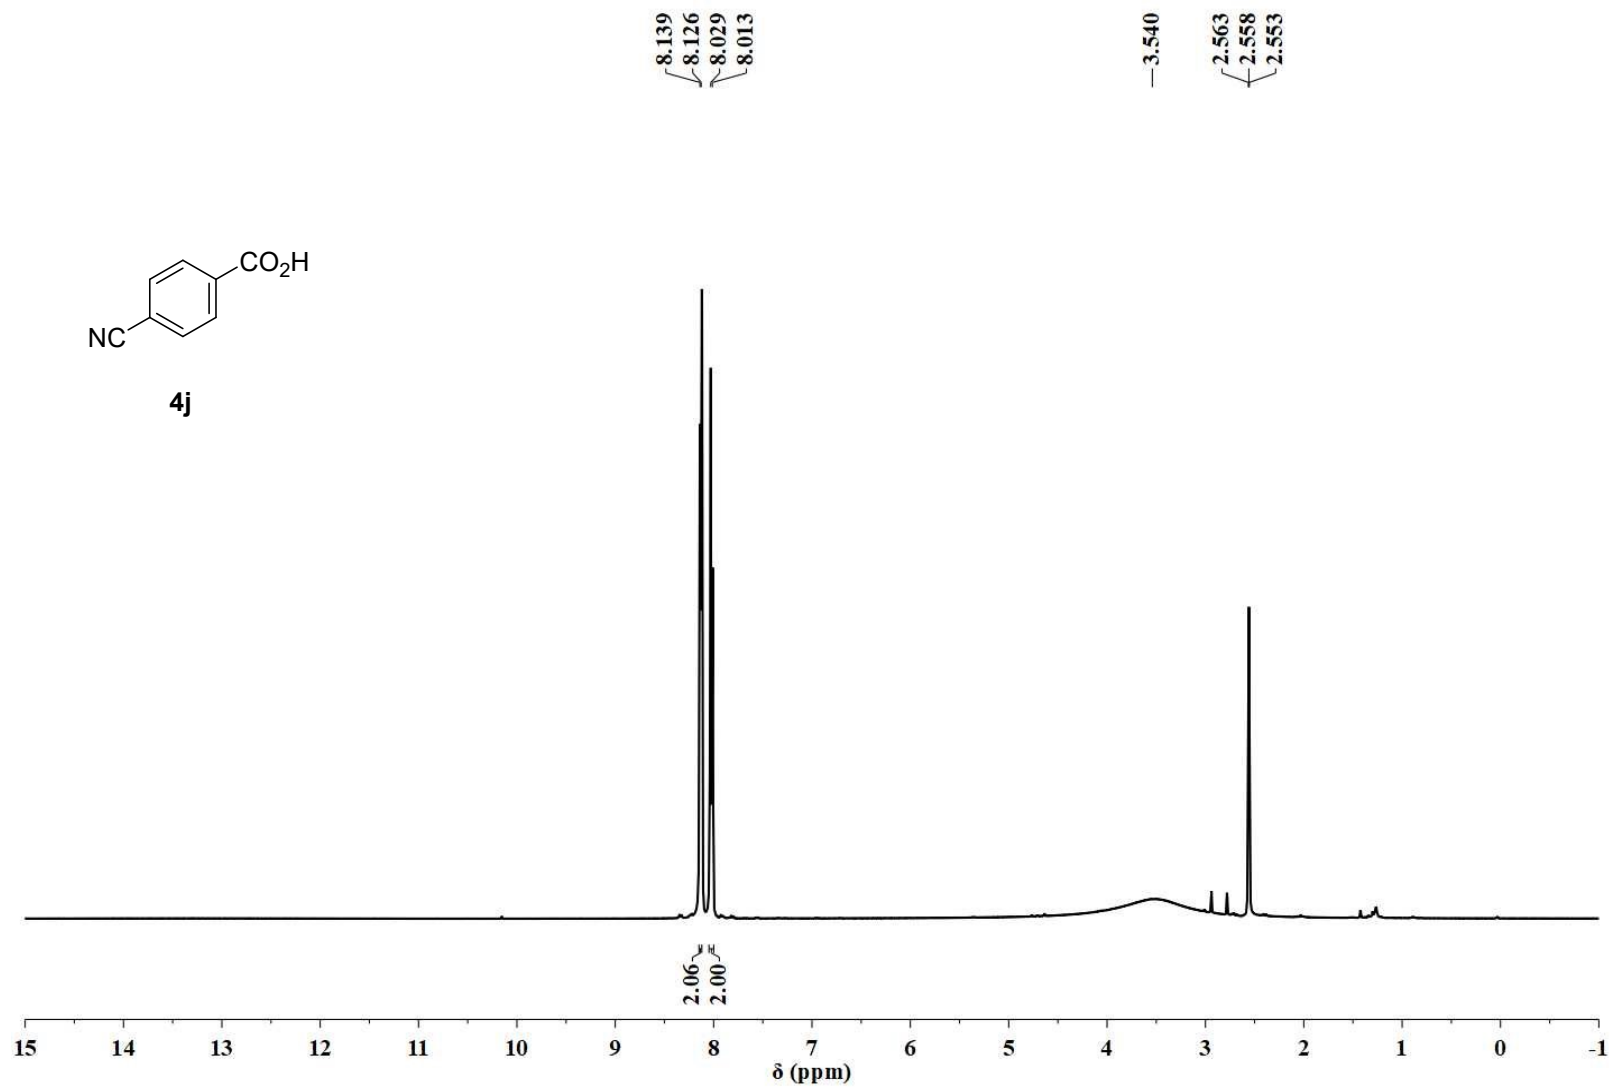

S54

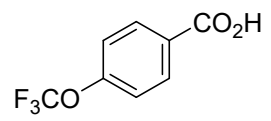

4k

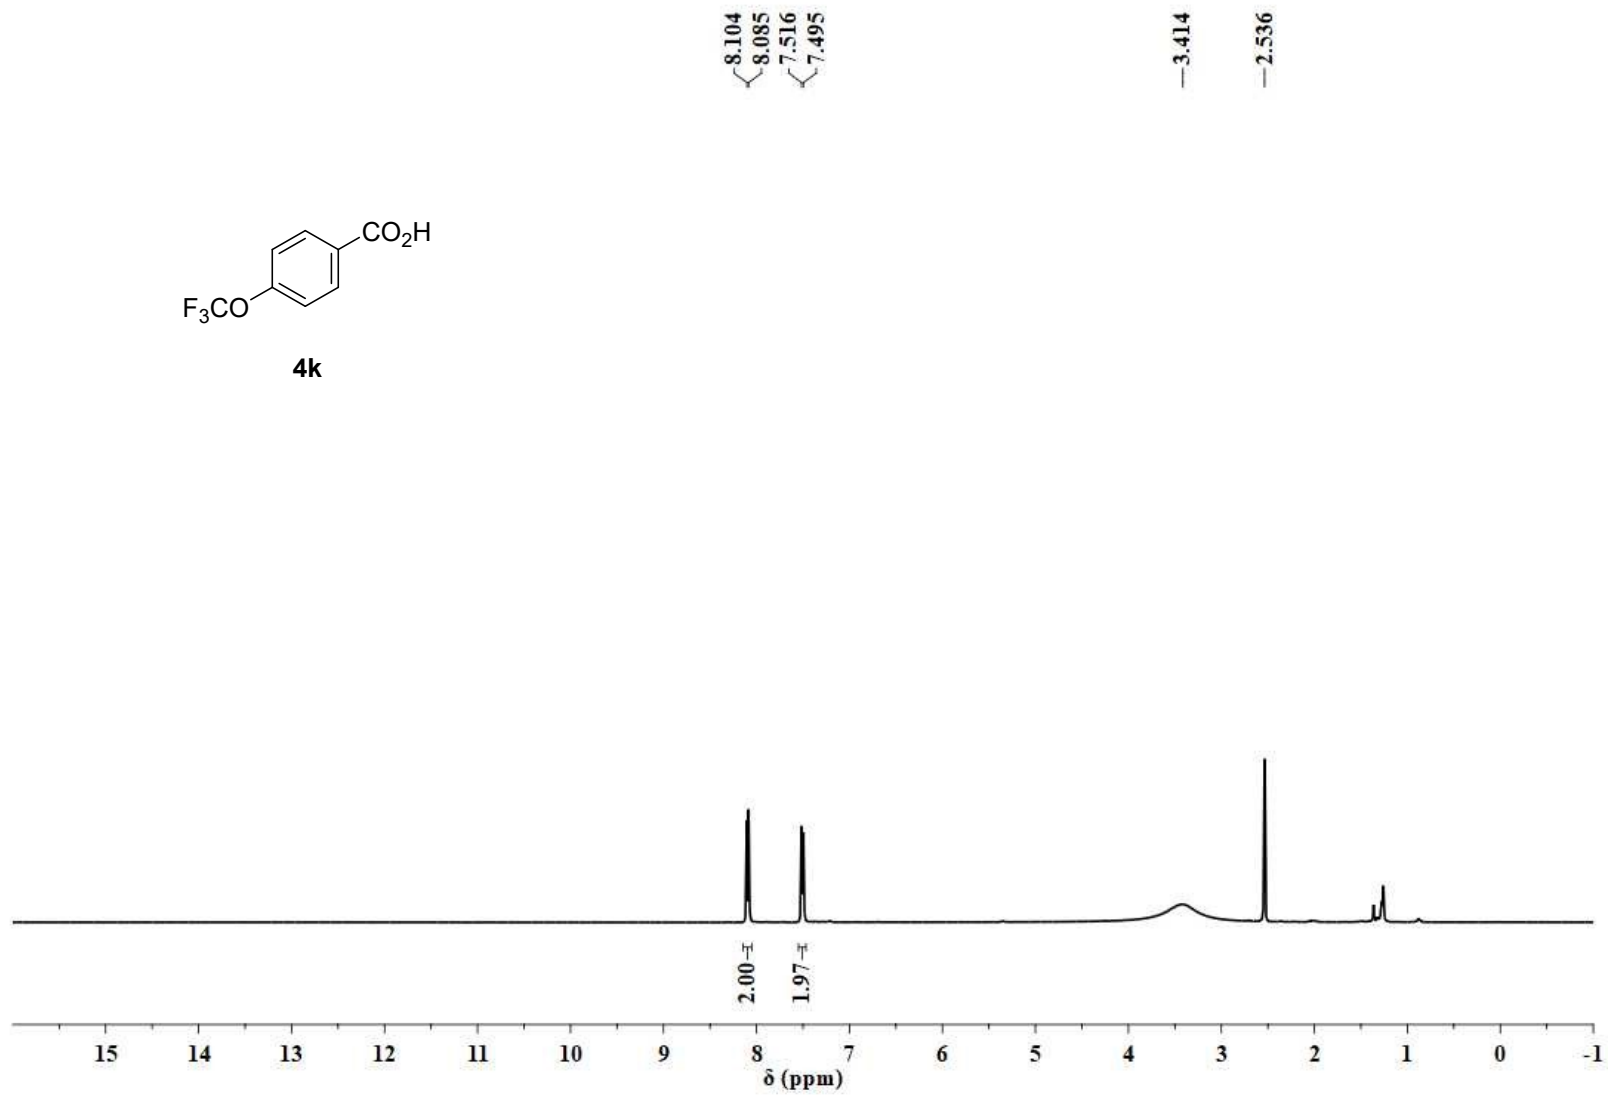

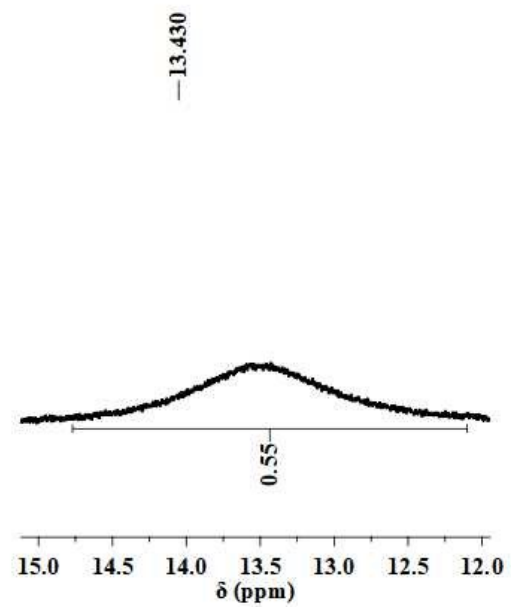

8.169  
8.148  
7.908  
7.888

—3.395  
—2.526

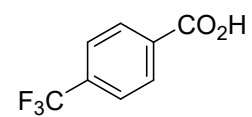

4l

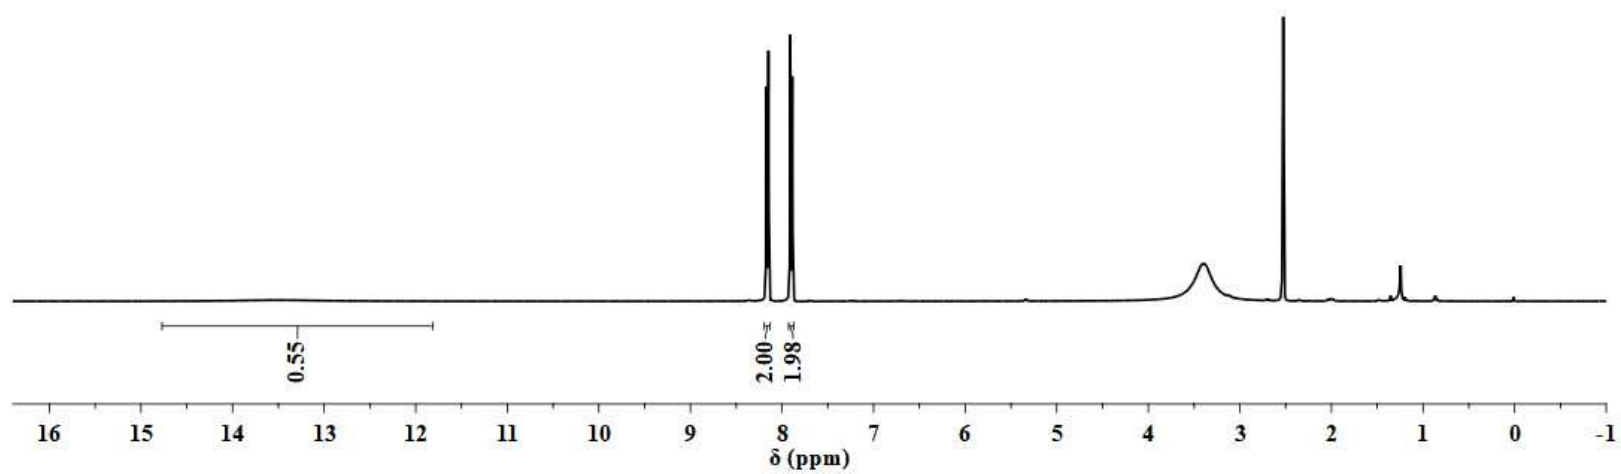

S56



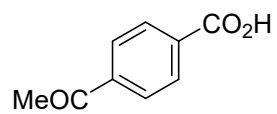

4m

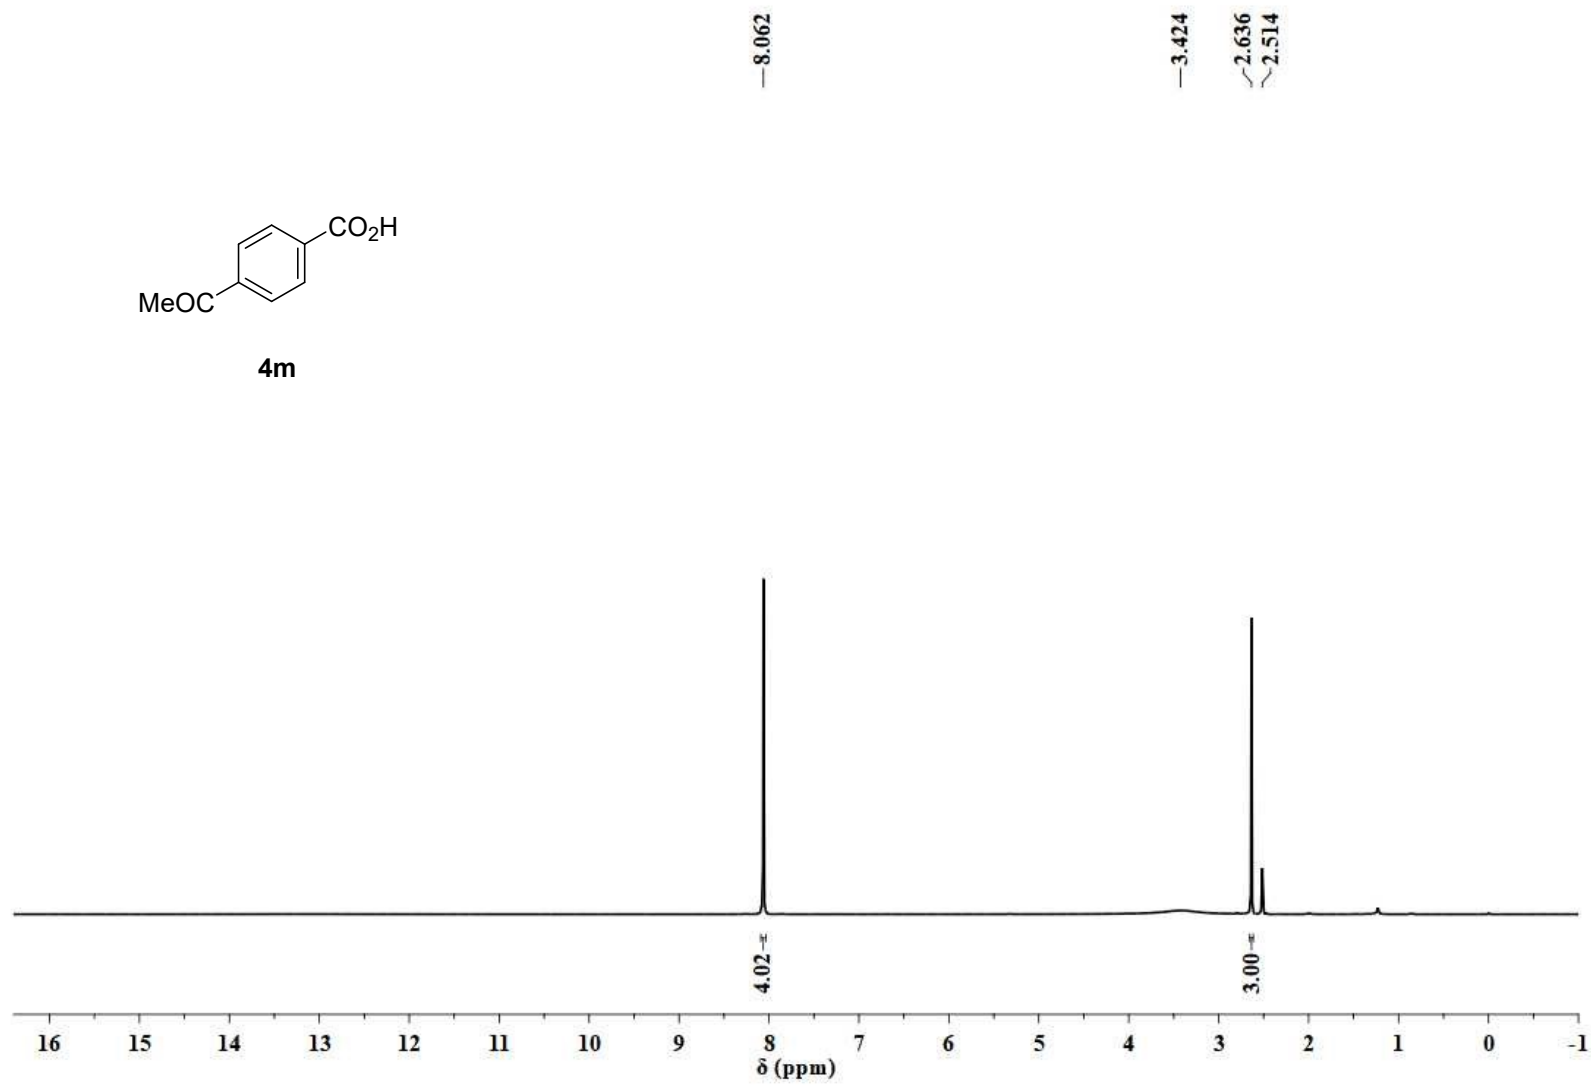

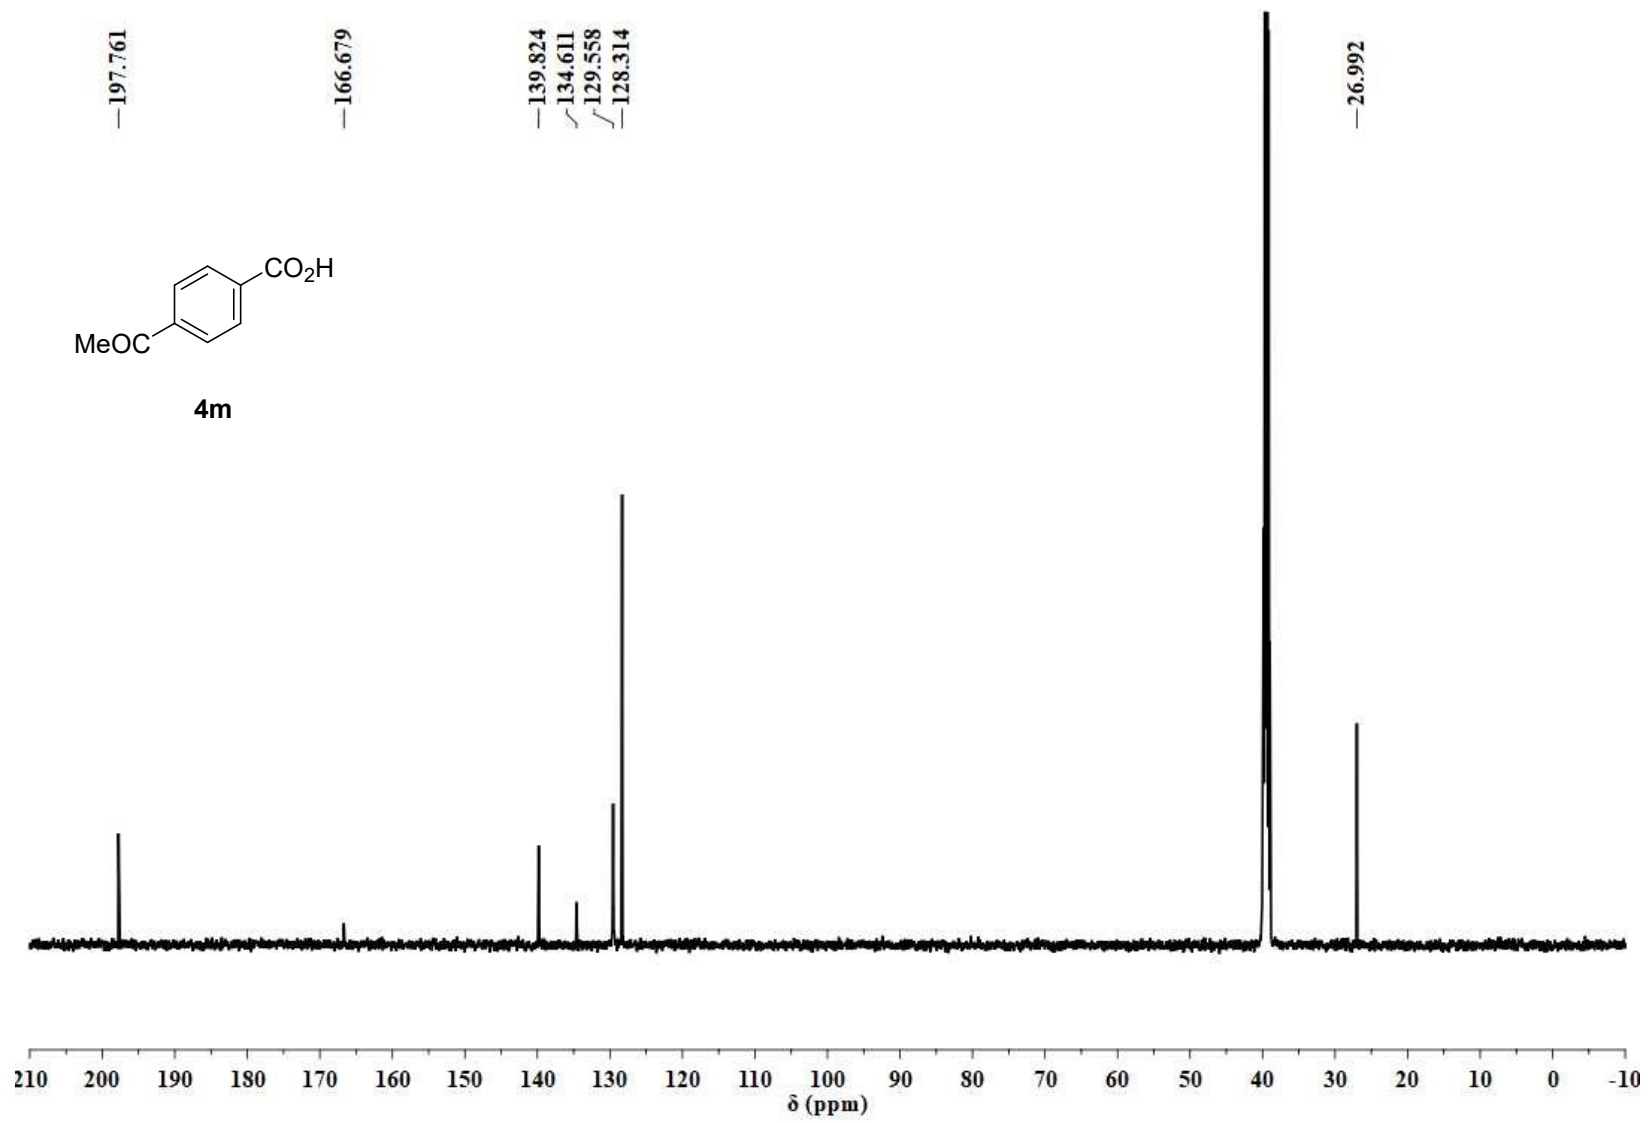

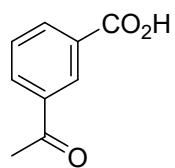

4n

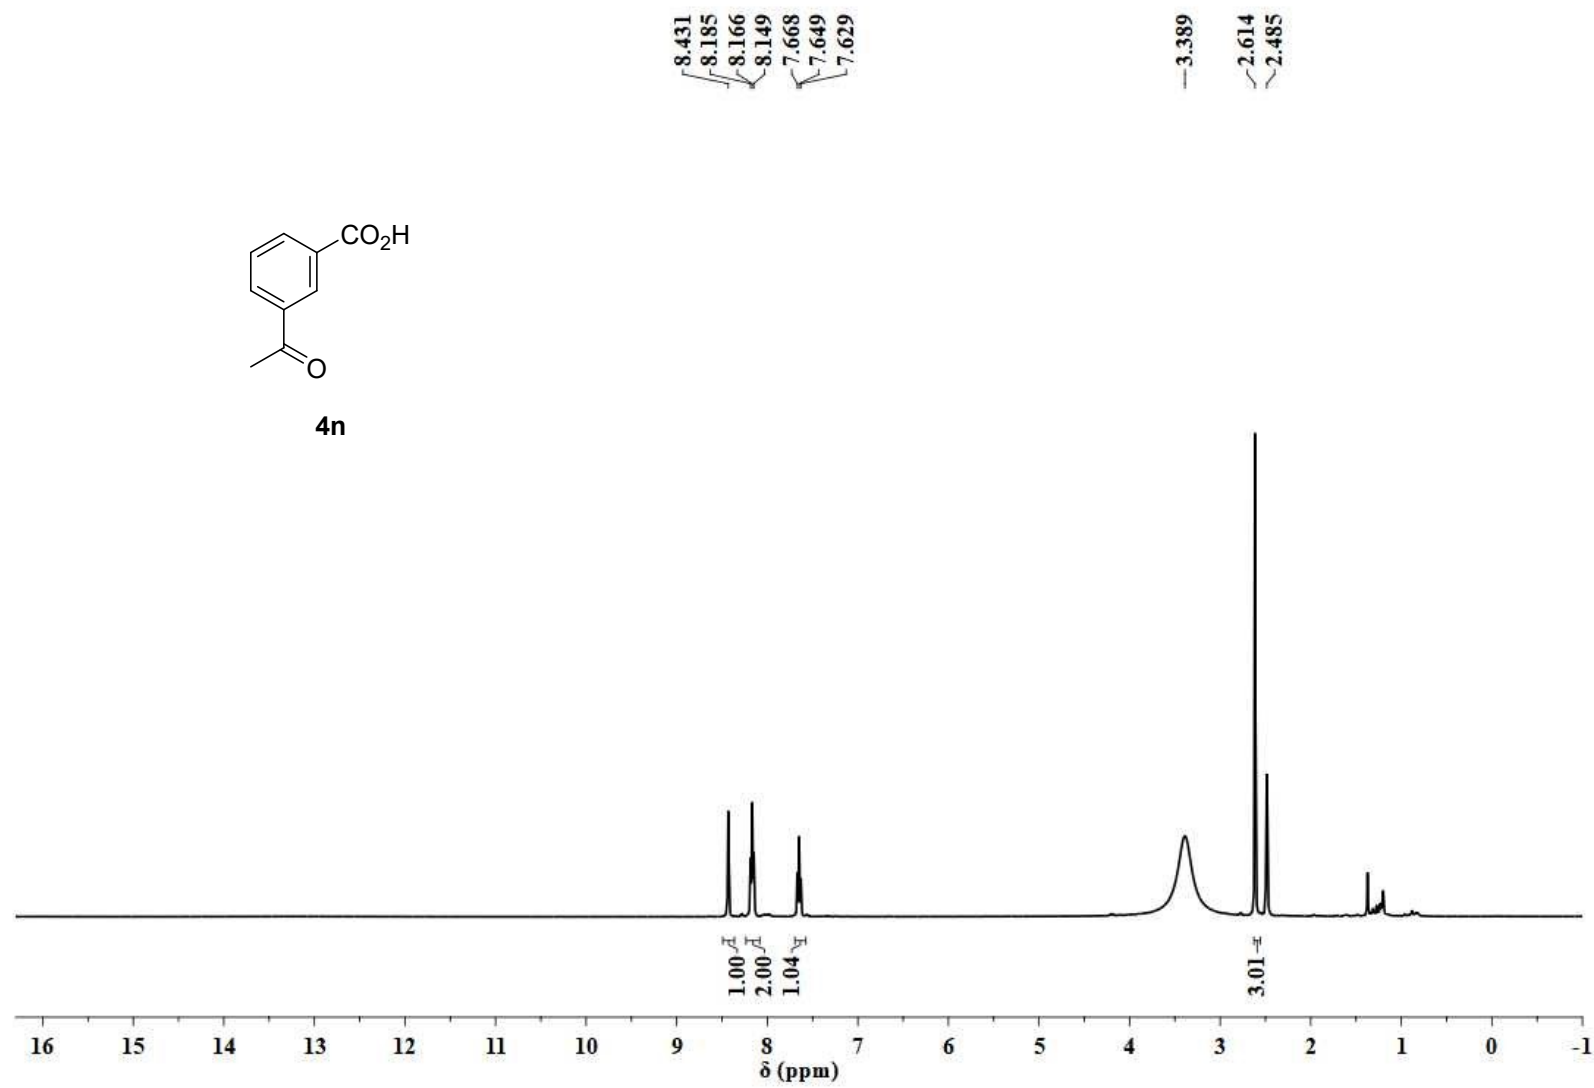

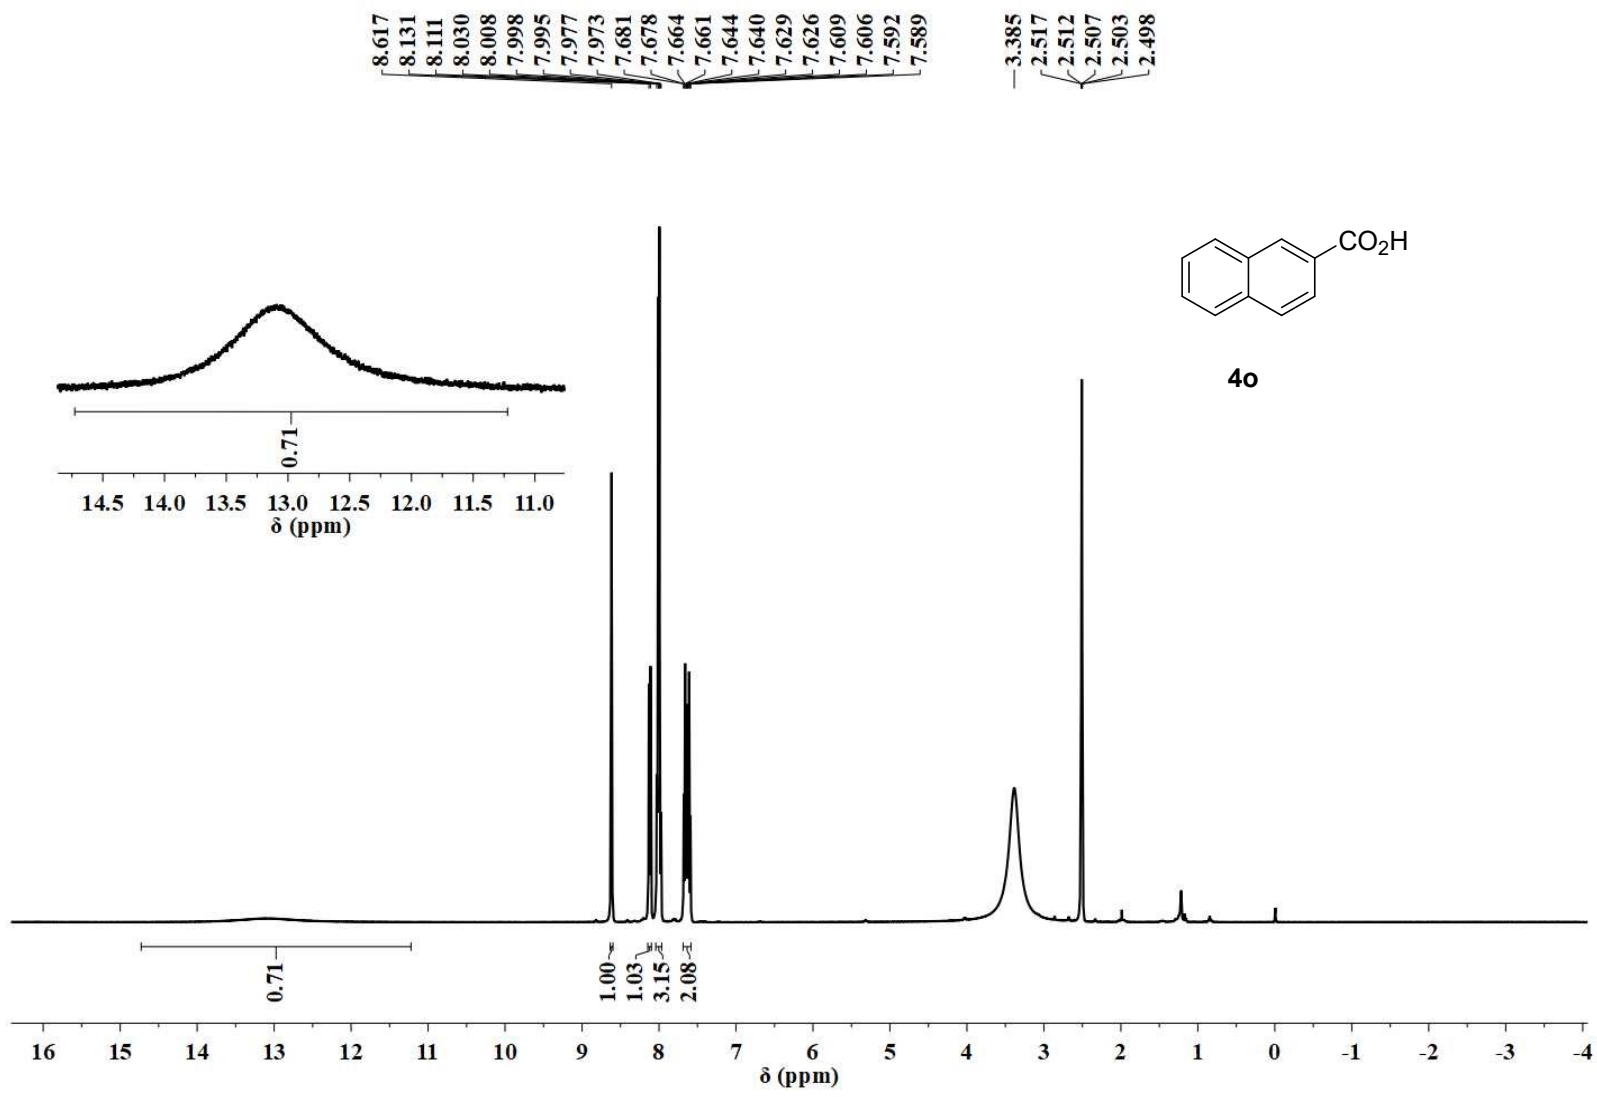

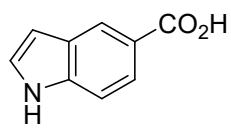

4p

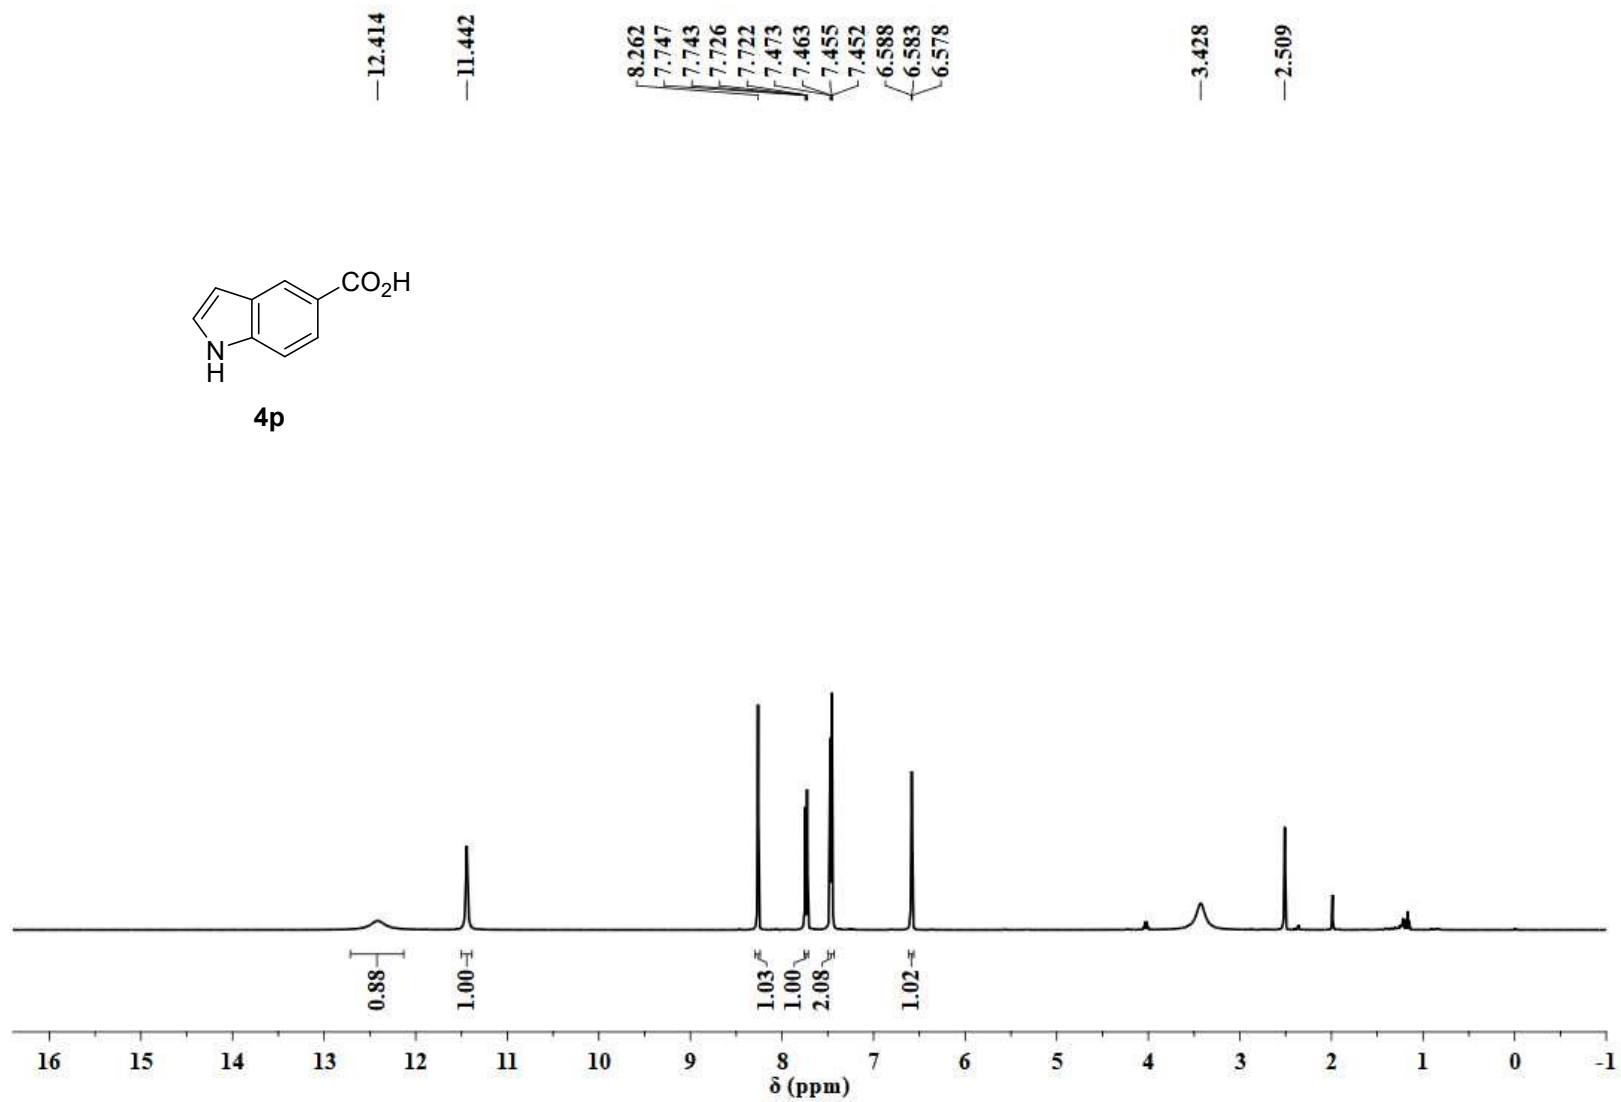

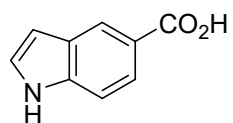

4p

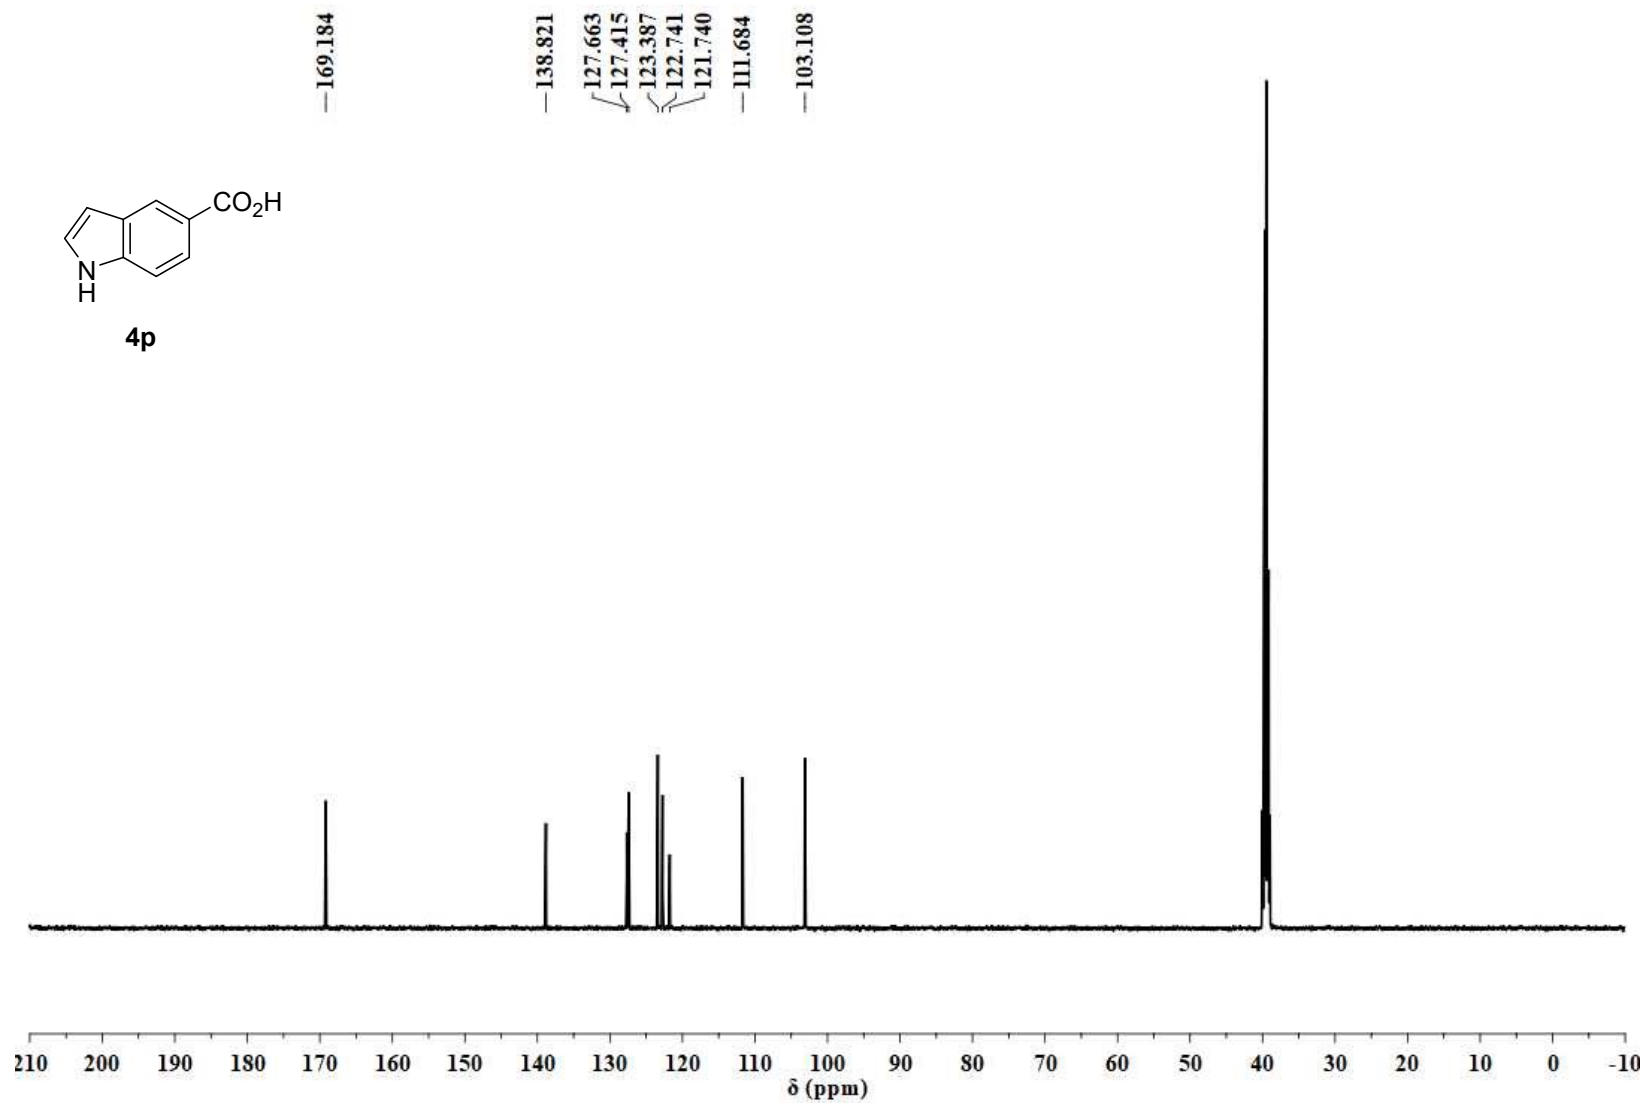

Supplement: d3ob00327b1.pdf [file d3ob00327b1.pdf]
